# Supplementary material for: Identification of Endothelial Cell Protein C Receptor by Urinary Proteomics as Novel Prognostic Marker in Non-Recovery Kidney Injury
Source: MDPI journal article supplement (doi:10.3390/ijms25052783), 2024-02-28
Supplement: s1 [file s1]

|         |         | Accession                                           | Description                                                                                             | Σ# Unique Peptides | Σ# Peptides | Ratio: 115/114 | Ratio: 116/114 |
|---------|---------|-----------------------------------------------------|---------------------------------------------------------------------------------------------------------|--------------------|-------------|----------------|----------------|
| 115/114 | 116/114 |                                                     |                                                                                                         |                    |             |                |                |
|         |         | <b>Up-Regulated Proteins in two Subgroups (189)</b> |                                                                                                         |                    |             |                |                |
| ▲       | ▲       | Q9ULH7                                              | MKL/myocardin-like protein 2 OS=Homo sapiens GN=MKL2 PE=1 SV=3 - [MKL2_HUMAN]                           | 1.00               | 1.00        | 4.53           | 28.30          |
| ▲       | ▲       | O75394                                              | 39S ribosomal protein L33, mitochondrial OS=Homo sapiens GN=MRPL33 PE=1 SV=1 - [RM33_HUMAN]             | 1.00               | 1.00        | 23.64          | 26.69          |
| ▲       | ▲       | P16860                                              | Natriuretic peptides B OS=Homo sapiens GN=NPPB PE=1 SV=1 - [ANFB_HUMAN]                                 | 1.00               | 1.00        | 7.78           | 19.48          |
| ▲       | ▲       | P35611                                              | Alpha-adducin OS=Homo sapiens GN=ADD1 PE=1 SV=2 - [ADDA_HUMAN]                                          | 1.00               | 1.00        | 2.53           | 18.36          |
| ▲       | ▲       | Q9NS71                                              | Gastroke-1 OS=Homo sapiens GN=GKN1 PE=2 SV=3 - [GKN1_HUMAN]                                             | 2.00               | 2.00        | 2.35           | 13.64          |
| ▲       | ▲       | Q9BX66                                              | Sorbin and SH3 domain-containing protein 1 OS=Homo sapiens GN=SORBS1 PE=1 SV=2 - [SRBS1_HUMAN]          | 1.00               | 1.00        | 2.71           | 13.61          |
| ▲       | ▲       | P63313                                              | Thymosin beta-10 OS=Homo sapiens GN=TMSB10 PE=1 SV=2 - [TYB10_HUMAN]                                    | 1.00               | 2.00        | 2.08           | 13.27          |
| ▲       | ▲       | Q15063                                              | Periostin OS=Homo sapiens GN=POSTN PE=1 SV=2 - [POSTN_HUMAN]                                            | 3.00               | 3.00        | 2.69           | 12.77          |
| ▲       | ▲       | P13747                                              | HLA class I histocompatibility antigen, alpha chain E OS=Homo sapiens GN=HLA-E PE=1 SV=3 - [HLAE_HUMAN] | 1.00               | 2.00        | 2.84           | 12.62          |
| ▲       | ▲       | P61626                                              | Lysozyme C OS=Homo sapiens GN=LYZ PE=1 SV=1 - [LYSC_HUMAN]                                              | 6.00               | 6.00        | 2.83           | 12.61          |
| ▲       | ▲       | Q0D2I5                                              | Intermediate filament family orphan 1 OS=Homo sapiens GN=IFFO1 PE=2 SV=2 - [IFFO1_HUMAN]                | 1.00               | 1.00        | 5.75           | 12.49          |
| ▲       | ▲       | Q9NPD7                                              | Neuritin OS=Homo sapiens GN=NRN1 PE=1 SV=1 - [NRN1_HUMAN]                                               | 1.00               | 1.00        | 3.24           | 11.70          |
| ▲       | ▲       | Q9P035                                              | Protein tyrosine phosphatase-like protein PTPLAD1 OS=Homo sapiens GN=PTPLAD1 PE=1 SV=2 - [PTAD1_HUMAN]  | 1.00               | 1.00        | 3.13           | 11.53          |
| ▲       | ▲       | A8MW06                                              | Thymosin beta-4-like protein 3 OS=Homo sapiens GN=TMSL3 PE=2 SV=1 - [TMSL3_HUMAN]                       | 2.00               | 3.00        | 4.00           | 11.53          |
| ▲       | ▲       | P51161                                              | Gastrotropin OS=Homo sapiens GN=FABP6 PE=1 SV=2 - [FABP6_HUMAN]                                         | 6.00               | 6.00        | 3.40           | 11.18          |
| ▲       | ▲       | P01178                                              | Oxytocin-neurophysin 1 OS=Homo sapiens GN=OXT PE=1 SV=1 - [NEU1_HUMAN]                                  | 1.00               | 2.00        | 4.99           | 11.18          |
| ▲       | ▲       | P02652                                              | Apolipoprotein A-II OS=Homo sapiens GN=APOA2 PE=1 SV=1 - [APOA2_HUMAN]                                  | 7.00               | 7.00        | 2.84           | 11.09          |
| ▲       | ▲       | P06727                                              | Apolipoprotein A-IV OS=Homo sapiens GN=APOA4 PE=1 SV=3 - [APOA4_HUMAN]                                  | 26.00              | 26.00       | 3.46           | 10.85          |
| ▲       | ▲       | P02647                                              | Apolipoprotein A-I OS=Homo sapiens GN=APOA1 PE=1 SV=1 - [APOA1_HUMAN]                                   | 24.00              | 24.00       | 2.05           | 10.83          |
| ▲       | ▲       | Q16627                                              | C-C motif chemokine 14 OS=Homo sapiens GN=CCL14 PE=1 SV=1 - [CCL14_HUMAN]                               | 3.00               | 3.00        | 2.18           | 10.21          |
| ▲       | ▲       | P05976                                              | Myosin light chain 1/3, skeletal muscle isoform OS=Homo sapiens GN=MYL1 PE=1 SV=3 - [MYL1_HUMAN]        | 1.00               | 2.00        | 2.23           | 10.16          |
| ▲       | ▲       | Q01523                                              | Defensin-5 OS=Homo sapiens GN=DEFA5 PE=1 SV=1 - [DEF5_HUMAN]                                            | 1.00               | 1.00        | 2.98           | 9.74           |
| ▲       | ▲       | P35542                                              | Serum amyloid A-4 protein OS=Homo sapiens GN=SAA4 PE=1 SV=2 - [SAA4_HUMAN]                              | 3.00               | 3.00        | 2.05           | 9.74           |
| ▲       | ▲       | P11226                                              | Mannose-binding protein C OS=Homo sapiens GN=MBL2 PE=1 SV=2 - [MBL2_HUMAN]                              | 2.00               | 2.00        | 2.42           | 9.56           |
| ▲       | ▲       | Q96S66                                              | Chloride channel CLIC-like protein 1 OS=Homo sapiens GN=CLCC1 PE=1 SV=1 - [CLCC1_HUMAN]                 | 1.00               | 1.00        | 2.22           | 9.36           |
| ▲       | ▲       | P02679                                              | Fibrinogen gamma chain OS=Homo sapiens GN=FGG PE=1 SV=3 - [FIBG_HUMAN]                                  | 14.00              | 14.00       | 3.27           | 9.36           |
| ▲       | ▲       | P24387                                              | Corticotropin-releasing factor-binding protein OS=Homo sapiens GN=CRHBP PE=1 SV=2 - [CRHBP_HUMAN]       | 3.00               | 3.00        | 2.88           | 9.22           |
| ▲       | ▲       | P51858                                              | Hepatoma-derived growth factor OS=Homo sapiens GN=HDGF PE=1 SV=1 - [HDGF_HUMAN]                         | 3.00               | 3.00        | 2.50           | 9.02           |
| ▲       | ▲       | Q9P1F3                                              | UPF0727 protein C6orf115 OS=Homo sapiens GN=C6orf115 PE=1 SV=1 - [CF115_HUMAN]                          | 2.00               | 2.00        | 2.87           | 8.41           |
| ▲       | ▲       | P05413                                              | Fatty acid-binding protein, heart OS=Homo sapiens GN=FABP3 PE=1 SV=4 - [FABPH_HUMAN]                    | 11.00              | 11.00       | 3.34           | 8.19           |
| ▲       | ▲       | P00751                                              | Complement factor B OS=Homo sapiens GN=CFB PE=1 SV=2 - [CFAB_HUMAN]                                     | 30.00              | 30.00       | 2.09           | 8.16           |
| ▲       | ▲       | P59665                                              | Neutrophil defensin 1 OS=Homo sapiens GN=DEFA1 PE=1 SV=1 - [DEF1_HUMAN]                                 | 5.00               | 5.00        | 3.29           | 7.90           |

|   |   |        |                                                                                                     |        |        |      |      |
|---|---|--------|-----------------------------------------------------------------------------------------------------|--------|--------|------|------|
| ▲ | ▲ | P36955 | Pigment epithelium-derived factor OS=Homo sapiens GN=SERPINF1 PE=1 SV=3 - [PEDF_HUMAN]              | 20.00  | 20.00  | 2.54 | 7.84 |
| ▲ | ▲ | P01034 | Cystatin-C OS=Homo sapiens GN=CST3 PE=1 SV=1 - [CYTC_HUMAN]                                         | 9.00   | 9.00   | 2.12 | 7.73 |
| ▲ | ▲ | P02748 | Complement component C9 OS=Homo sapiens GN=C9 PE=1 SV=2 - [CO9_HUMAN]                               | 17.00  | 17.00  | 2.08 | 7.53 |
| ▲ | ▲ | P02144 | Myoglobin OS=Homo sapiens GN=MB PE=1 SV=2 - [MYG_HUMAN]                                             | 9.00   | 9.00   | 2.64 | 7.51 |
| ▲ | ▲ | Q08554 | Desmocollin-1 OS=Homo sapiens GN=DSC1 PE=1 SV=2 - [DSC1_HUMAN]                                      | 4.00   | 4.00   | 2.84 | 7.38 |
| ▲ | ▲ | P23083 | Ig heavy chain V-I region V35 OS=Homo sapiens PE=1 SV=1 - [HV103_HUMAN]                             | 2.00   | 3.00   | 2.73 | 7.32 |
| ▲ | ▲ | Q8WXD2 | Secretogranin-3 OS=Homo sapiens GN=SCG3 PE=1 SV=3 - [SCG3_HUMAN]                                    | 1.00   | 1.00   | 2.20 | 7.27 |
| ▲ | ▲ | P01344 | Insulin-like growth factor II OS=Homo sapiens GN=IGF2 PE=1 SV=1 - [IGF2_HUMAN]                      | 4.00   | 5.00   | 4.15 | 7.12 |
| ▲ | ▲ | P36980 | Complement factor H-related protein 2 OS=Homo sapiens GN=CFHR2 PE=1 SV=1 - [FHR2_HUMAN]             | 4.00   | 8.00   | 3.86 | 7.11 |
| ▲ | ▲ | Q5JU67 | Uncharacterized protein C9orf117 OS=Homo sapiens GN=C9orf117 PE=2 SV=1 - [C1117_HUMAN]              | 1.00   | 1.00   | 5.98 | 7.10 |
| ▲ | ▲ | Q96IY4 | Carboxypeptidase B2 OS=Homo sapiens GN=CPB2 PE=1 SV=1 - [CBPB2_HUMAN]                               | 2.00   | 2.00   | 2.43 | 7.08 |
| ▲ | ▲ | Q9UNN5 | FAS-associated factor 1 OS=Homo sapiens GN=FAF1 PE=1 SV=2 - [FAF1_HUMAN]                            | 1.00   | 1.00   | 2.38 | 7.04 |
| ▲ | ▲ | P28300 | Protein-lysine 6-oxidase OS=Homo sapiens GN=LOX PE=1 SV=2 - [LYOX_HUMAN]                            | 3.00   | 3.00   | 3.15 | 7.03 |
| ▲ | ▲ | Q9UGM5 | Fetuin-B OS=Homo sapiens GN=FETUB PE=1 SV=2 - [FETUB_HUMAN]                                         | 8.00   | 8.00   | 2.93 | 7.03 |
| ▲ | ▲ | P04080 | Cystatin-B OS=Homo sapiens GN=CSTB PE=1 SV=2 - [CYTB_HUMAN]                                         | 6.00   | 6.00   | 3.16 | 6.93 |
| ▲ | ▲ | P02775 | Platelet basic protein OS=Homo sapiens GN=PPBP PE=1 SV=3 - [CXCL7_HUMAN]                            | 3.00   | 3.00   | 3.00 | 6.88 |
| ▲ | ▲ | P27169 | Serum paraoxonase/arylesterase 1 OS=Homo sapiens GN=PON1 PE=1 SV=2 - [PON1_HUMAN]                   | 5.00   | 5.00   | 3.00 | 6.85 |
| ▲ | ▲ | Q96KK5 | Histone H2A type 1-H OS=Homo sapiens GN=HIST1H2AH PE=1 SV=3 - [H2A1H_HUMAN]                         | 1.00   | 1.00   | 3.09 | 6.69 |
| ▲ | ▲ | P14621 | Acyolphosphatase-2 OS=Homo sapiens GN=ACYP2 PE=1 SV=2 - [ACYP2_HUMAN]                               | 3.00   | 3.00   | 2.22 | 6.64 |
| ▲ | ▲ | P05160 | Coagulation factor XIII B chain OS=Homo sapiens GN=F13B PE=1 SV=3 - [F13B_HUMAN]                    | 10.00  | 10.00  | 2.52 | 6.55 |
| ▲ | ▲ | P27918 | Properdin OS=Homo sapiens GN=CFP PE=1 SV=2 - [PROP_HUMAN]                                           | 1.00   | 1.00   | 3.06 | 6.51 |
| ▲ | ▲ | Q9NQ38 | Serine protease inhibitor Kazal-type 5 OS=Homo sapiens GN=SPINK5 PE=1 SV=2 - [ISK5_HUMAN]           | 25.00  | 25.00  | 3.33 | 6.50 |
| ▲ | ▲ | O14556 | Glyceraldehyde-3-phosphate dehydrogenase, testis-specific OS=Homo sapiens GN=GAPDHS PE=1 SV=2 - [G3 | 1.00   | 1.00   | 3.35 | 6.41 |
| ▲ | ▲ | P08311 | Cathepsin G OS=Homo sapiens GN=CTSG PE=1 SV=2 - [CATG_HUMAN]                                        | 2.00   | 2.00   | 2.21 | 6.38 |
| ▲ | ▲ | P02675 | Fibrinogen beta chain OS=Homo sapiens GN=FGB PE=1 SV=2 - [FIBB_HUMAN]                               | 18.00  | 18.00  | 2.91 | 6.31 |
| ▲ | ▲ | Q9ULZ3 | Apoptosis-associated speck-like protein containing a CARD OS=Homo sapiens GN=PYCARD PE=1 SV=2 - [A  | 6.00   | 6.00   | 2.37 | 6.18 |
| ▲ | ▲ | P01024 | Complement C3 OS=Homo sapiens GN=C3 PE=1 SV=2 - [CO3_HUMAN]                                         | 101.00 | 101.00 | 2.16 | 6.17 |
| ▲ | ▲ | P48304 | Lithostathine-1-beta OS=Homo sapiens GN=REG1B PE=1 SV=1 - [REG1B_HUMAN]                             | 4.00   | 8.00   | 8.47 | 6.14 |
| ▲ | ▲ | Q9H2X0 | Chordin OS=Homo sapiens GN=CHRD PE=1 SV=2 - [CHRD_HUMAN]                                            | 1.00   | 1.00   | 2.04 | 6.08 |
| ▲ | ▲ | P19827 | Inter-alpha-trypsin inhibitor heavy chain H1 OS=Homo sapiens GN=ITIH1 PE=1 SV=3 - [ITIH1_HUMAN]     | 13.00  | 13.00  | 2.17 | 6.06 |
| ▲ | ▲ | P02746 | Complement C1q subcomponent subunit B OS=Homo sapiens GN=C1QB PE=1 SV=2 - [C1QB_HUMAN]              | 1.00   | 1.00   | 2.09 | 6.05 |
| ▲ | ▲ | P02774 | Vitamin D-binding protein OS=Homo sapiens GN=GC PE=1 SV=1 - [VTDB_HUMAN]                            | 36.00  | 36.00  | 2.12 | 5.89 |
| ▲ | ▲ | P62805 | Histone H4 OS=Homo sapiens GN=HIST1H4A PE=1 SV=2 - [H4_HUMAN]                                       | 4.00   | 4.00   | 2.11 | 5.87 |
| ▲ | ▲ | P15090 | Fatty acid-binding protein, adipocyte OS=Homo sapiens GN=FABP4 PE=1 SV=3 - [FABP4_HUMAN]            | 8.00   | 8.00   | 3.74 | 5.80 |
| ▲ | ▲ | P58166 | Inhibin beta E chain OS=Homo sapiens GN=INHBE PE=1 SV=1 - [INHBE_HUMAN]                             | 1.00   | 1.00   | 2.41 | 5.73 |
| ▲ | ▲ | O60575 | Serine protease inhibitor Kazal-type 4 OS=Homo sapiens GN=SPINK4 PE=2 SV=1 - [ISK4_HUMAN]           | 1.00   | 1.00   | 5.09 | 5.71 |

|   |   |        |                                                                                                         |       |       |       |      |
|---|---|--------|---------------------------------------------------------------------------------------------------------|-------|-------|-------|------|
| ▲ | ▲ | Q06033 | Inter-alpha-trypsin inhibitor heavy chain H3 OS=Homo sapiens GN=ITIH3 PE=1 SV=2 - [ITIH3_HUMAN]         | 8.00  | 8.00  | 2.90  | 5.70 |
| ▲ | ▲ | P00740 | Coagulation factor IX OS=Homo sapiens GN=F9 PE=1 SV=2 - [FA9_HUMAN]                                     | 6.00  | 6.00  | 2.18  | 5.68 |
| ▲ | ▲ | P50120 | Retinol-binding protein 2 OS=Homo sapiens GN=RBP2 PE=1 SV=3 - [RET2_HUMAN]                              | 3.00  | 3.00  | 4.67  | 5.65 |
| ▲ | ▲ | Q6NT04 | Tigger transposable element-derived protein 7 OS=Homo sapiens GN=TIGD7 PE=2 SV=1 - [TIGD7_HUMAN]        | 1.00  | 1.00  | 5.37  | 5.65 |
| ▲ | ▲ | P00739 | Haptoglobin-related protein OS=Homo sapiens GN=HPR PE=1 SV=2 - [HPTR_HUMAN]                             | 2.00  | 13.00 | 3.96  | 5.62 |
| ▲ | ▲ | P20774 | Mimecan OS=Homo sapiens GN=OGN PE=1 SV=1 - [MIME_HUMAN]                                                 | 7.00  | 7.00  | 2.52  | 5.55 |
| ▲ | ▲ | Q86V81 | THO complex subunit 4 OS=Homo sapiens GN=THOC4 PE=1 SV=3 - [THOC4_HUMAN]                                | 1.00  | 1.00  | 2.23  | 5.53 |
| ▲ | ▲ | P04196 | Histidine-rich glycoprotein OS=Homo sapiens GN=HRG PE=1 SV=1 - [HRG_HUMAN]                              | 14.00 | 14.00 | 2.73  | 5.45 |
| ▲ | ▲ | Q9BZ29 | Dedicator of cytokinesis protein 9 OS=Homo sapiens GN=DOCK9 PE=1 SV=2 - [DOCK9_HUMAN]                   | 1.00  | 1.00  | 4.24  | 5.45 |
| ▲ | ▲ | Q14118 | Dystroglycan OS=Homo sapiens GN=DAG1 PE=1 SV=2 - [DAG1_HUMAN]                                           | 9.00  | 9.00  | 2.21  | 5.43 |
| ▲ | ▲ | P30042 | ES1 protein homolog, mitochondrial OS=Homo sapiens GN=C21orf33 PE=1 SV=3 - [ES1_HUMAN]                  | 3.00  | 3.00  | 2.02  | 5.40 |
| ▲ | ▲ | P02753 | Retinol-binding protein 4 OS=Homo sapiens GN=RBP4 PE=1 SV=3 - [RET4_HUMAN]                              | 15.00 | 15.00 | 2.86  | 5.30 |
| ▲ | ▲ | P08833 | Insulin-like growth factor-binding protein 1 OS=Homo sapiens GN=IGFBP1 PE=1 SV=1 - [IBP1_HUMAN]         | 3.00  | 3.00  | 2.27  | 5.26 |
| ▲ | ▲ | P24158 | Myeloblastin OS=Homo sapiens GN=PRTN3 PE=1 SV=3 - [PRTN3_HUMAN]                                         | 4.00  | 4.00  | 2.54  | 5.21 |
| ▲ | ▲ | P61769 | Beta-2-microglobulin OS=Homo sapiens GN=B2M PE=1 SV=1 - [B2MG_HUMAN]                                    | 8.00  | 8.00  | 3.37  | 5.02 |
| ▲ | ▲ | P08246 | Neutrophil elastase OS=Homo sapiens GN=ELANE PE=1 SV=1 - [ELNE_HUMAN]                                   | 5.00  | 5.00  | 3.04  | 5.01 |
| ▲ | ▲ | Q16610 | Extracellular matrix protein 1 OS=Homo sapiens GN=ECM1 PE=1 SV=2 - [ECM1_HUMAN]                         | 9.00  | 9.00  | 2.21  | 4.97 |
| ▲ | ▲ | P80188 | Neutrophil gelatinase-associated lipocalin OS=Homo sapiens GN=LCN2 PE=1 SV=2 - [NGAL_HUMAN]             | 9.00  | 9.00  | 3.31  | 4.96 |
| ▲ | ▲ | Q8WW59 | SPRY domain-containing protein 4 OS=Homo sapiens GN=SPRYD4 PE=1 SV=2 - [SPRY4_HUMAN]                    | 1.00  | 1.00  | 2.97  | 4.94 |
| ▲ | ▲ | P24592 | Insulin-like growth factor-binding protein 6 OS=Homo sapiens GN=IGFBP6 PE=1 SV=1 - [IBP6_HUMAN]         | 7.00  | 7.00  | 2.15  | 4.93 |
| ▲ | ▲ | P55103 | Inhibin beta C chain OS=Homo sapiens GN=INHBC PE=1 SV=1 - [INHBC_HUMAN]                                 | 2.00  | 2.00  | 2.46  | 4.92 |
| ▲ | ▲ | P06310 | Ig kappa chain V-II region RPMI 6410 OS=Homo sapiens PE=4 SV=1 - [KV206_HUMAN]                          | 1.00  | 3.00  | 15.95 | 4.85 |
| ▲ | ▲ | P05164 | Myeloperoxidase OS=Homo sapiens GN=MPO PE=1 SV=1 - [PERM_HUMAN]                                         | 20.00 | 20.00 | 2.43  | 4.84 |
| ▲ | ▲ | Q5FWF4 | Zinc finger Ran-binding domain-containing protein 3 OS=Homo sapiens GN=ZRANB3 PE=2 SV=2 - [ZRAB3_HUMAN] | 1.00  | 1.00  | 3.46  | 4.81 |
| ▲ | ▲ | P07988 | Pulmonary surfactant-associated protein B OS=Homo sapiens GN=SFTPB PE=1 SV=3 - [PSPB_HUMAN]             | 2.00  | 2.00  | 2.09  | 4.80 |
| ▲ | ▲ | P05546 | Heparin cofactor 2 OS=Homo sapiens GN=SERPIND1 PE=1 SV=3 - [HEP2_HUMAN]                                 | 12.00 | 12.00 | 2.02  | 4.72 |
| ▲ | ▲ | Q8N3J3 | Uncharacterized protein C17orf53 OS=Homo sapiens GN=C17orf53 PE=2 SV=1 - [CQ053_HUMAN]                  | 1.00  | 1.00  | 3.45  | 4.68 |
| ▲ | ▲ | P07737 | Profilin-1 OS=Homo sapiens GN=PFN1 PE=1 SV=2 - [PROF1_HUMAN]                                            | 8.00  | 8.00  | 2.29  | 4.67 |
| ▲ | ▲ | Q01082 | Spectrin beta chain, brain 1 OS=Homo sapiens GN=SPTBN1 PE=1 SV=2 - [SPTB2_HUMAN]                        | 1.00  | 1.00  | 5.31  | 4.66 |
| ▲ | ▲ | Q9BU40 | Chordin-like protein 1 OS=Homo sapiens GN=CHRD1 PE=2 SV=1 - [CRDL1_HUMAN]                               | 2.00  | 2.00  | 2.06  | 4.66 |
| ▲ | ▲ | P07478 | Trypsin-2 OS=Homo sapiens GN=PRSS2 PE=1 SV=1 - [TRY2_HUMAN]                                             | 2.00  | 4.00  | 3.24  | 4.64 |
| ▲ | ▲ | P02768 | Serum albumin OS=Homo sapiens GN=ALB PE=1 SV=2 - [ALBU_HUMAN]                                           | 92.00 | 92.00 | 3.38  | 4.61 |
| ▲ | ▲ | P01768 | Ig heavy chain V-III region CAM OS=Homo sapiens PE=1 SV=1 - [HV307_HUMAN]                               | 2.00  | 2.00  | 2.51  | 4.59 |
| ▲ | ▲ | P08670 | Vimentin OS=Homo sapiens GN=VIM PE=1 SV=4 - [VIME_HUMAN]                                                | 8.00  | 10.00 | 2.34  | 4.36 |
| ▲ | ▲ | P06702 | Protein S100-A9 OS=Homo sapiens GN=S100A9 PE=1 SV=1 - [S10A9_HUMAN]                                     | 7.00  | 7.00  | 2.05  | 4.35 |
| ▲ | ▲ | Q13519 | Nociceptin OS=Homo sapiens GN=PNOC PE=1 SV=1 - [PNOC_HUMAN]                                             | 1.00  | 1.00  | 2.85  | 4.30 |

|   |   |        |                                                                                                      |       |       |      |      |
|---|---|--------|------------------------------------------------------------------------------------------------------|-------|-------|------|------|
| ▲ | ▲ | P46939 | Utrophin OS=Homo sapiens GN=UTRN PE=1 SV=2 - [UTRO_HUMAN]                                            | 1.00  | 1.00  | 2.17 | 4.13 |
| ▲ | ▲ | P02790 | Hemopexin OS=Homo sapiens GN=HPX PE=1 SV=2 - [HEMO_HUMAN]                                            | 25.00 | 25.00 | 2.30 | 4.12 |
| ▲ | ▲ | A6NLU5 | V-set and transmembrane domain-containing protein 2B OS=Homo sapiens GN=VSTM2B PE=2 SV=2 - [VTM]     | 2.00  | 2.00  | 2.17 | 4.06 |
| ▲ | ▲ | P01610 | Ig kappa chain V-I region WEA OS=Homo sapiens PE=1 SV=1 - [KV118_HUMAN]                              | 1.00  | 2.00  | 2.32 | 4.03 |
| ▲ | ▲ | O43432 | Eukaryotic translation initiation factor 4 gamma 3 OS=Homo sapiens GN=EIF4G3 PE=1 SV=2 - [IF4G3_HUM] | 1.00  | 1.00  | 2.92 | 4.01 |
| ▲ | ▲ | Q6ZQW0 | Indoleamine 2,3-dioxygenase 2 OS=Homo sapiens GN=IDO2 PE=1 SV=3 - [I23O2_HUMAN]                      | 1.00  | 1.00  | 3.80 | 3.92 |
| ▲ | ▲ | P09681 | Gastric inhibitory polypeptide OS=Homo sapiens GN=GIP PE=1 SV=1 - [GIP_HUMAN]                        | 4.00  | 4.00  | 2.25 | 3.91 |
| ▲ | ▲ | P01023 | Alpha-2-macroglobulin OS=Homo sapiens GN=A2M PE=1 SV=2 - [A2MG_HUMAN]                                | 55.00 | 55.00 | 3.35 | 3.82 |
| ▲ | ▲ | P00995 | Pancreatic secretory trypsin inhibitor OS=Homo sapiens GN=SPINK1 PE=1 SV=2 - [ISK1_HUMAN]            | 3.00  | 3.00  | 2.37 | 3.81 |
| ▲ | ▲ | Q9BWQ8 | Fas apoptotic inhibitory molecule 2 OS=Homo sapiens GN=FAIM2 PE=1 SV=1 - [FAIM2_HUMAN]               | 1.00  | 1.00  | 2.16 | 3.74 |
| ▲ | ▲ | Q9NZD4 | Alpha-hemoglobin-stabilizing protein OS=Homo sapiens GN=AHSP PE=1 SV=1 - [AHSP_HUMAN]                | 3.00  | 3.00  | 2.43 | 3.74 |
| ▲ | ▲ | Q9BZG9 | Ly-6/neurotoxin-like protein 1 OS=Homo sapiens GN=LYNX1 PE=1 SV=2 - [LYNX1_HUMAN]                    | 1.00  | 1.00  | 2.21 | 3.73 |
| ▲ | ▲ | P01769 | Ig heavy chain V-III region GA OS=Homo sapiens PE=1 SV=1 - [HV308_HUMAN]                             | 2.00  | 2.00  | 2.42 | 3.73 |
| ▲ | ▲ | O14793 | Growth/differentiation factor 8 OS=Homo sapiens GN=MSTN PE=1 SV=1 - [GDF8_HUMAN]                     | 2.00  | 2.00  | 2.02 | 3.64 |
| ▲ | ▲ | P22894 | Neutrophil collagenase OS=Homo sapiens GN=MMP8 PE=1 SV=1 - [MMP8_HUMAN]                              | 5.00  | 5.00  | 3.45 | 3.58 |
| ▲ | ▲ | P01773 | Ig heavy chain V-III region BUR OS=Homo sapiens PE=1 SV=1 - [HV312_HUMAN]                            | 1.00  | 1.00  | 2.01 | 3.55 |
| ▲ | ▲ | O75368 | SH3 domain-binding glutamic acid-rich-like protein OS=Homo sapiens GN=SH3BGRL PE=1 SV=1 - [SH3L1_    | 9.00  | 9.00  | 2.32 | 3.51 |
| ▲ | ▲ | Q6JBY9 | CapZ-interacting protein OS=Homo sapiens GN=RCSL1 PE=1 SV=1 - [CPZIP_HUMAN]                          | 3.00  | 3.00  | 2.54 | 3.50 |
| ▲ | ▲ | Q8TC20 | Cancer-associated gene 1 protein OS=Homo sapiens GN=CAGE1 PE=2 SV=2 - [CAGE1_HUMAN]                  | 1.00  | 1.00  | 2.52 | 3.50 |
| ▲ | ▲ | P02787 | Serotransferrin OS=Homo sapiens GN=TF PE=1 SV=2 - [TRFE_HUMAN]                                       | 58.00 | 58.00 | 2.64 | 3.49 |
| ▲ | ▲ | O60353 | Frizzled-6 OS=Homo sapiens GN=FZD6 PE=1 SV=2 - [FZD6_HUMAN]                                          | 1.00  | 1.00  | 3.02 | 3.49 |
| ▲ | ▲ | Q7Z2H8 | Proton-coupled amino acid transporter 1 OS=Homo sapiens GN=SLC36A1 PE=1 SV=1 - [S36A1_HUMAN]         | 1.00  | 1.00  | 2.13 | 3.45 |
| ▲ | ▲ | P61956 | Small ubiquitin-related modifier 2 OS=Homo sapiens GN=SUMO2 PE=1 SV=1 - [SUMO2_HUMAN]                | 1.00  | 1.00  | 2.00 | 3.41 |
| ▲ | ▲ | Q92520 | Protein FAM3C OS=Homo sapiens GN=FAM3C PE=1 SV=1 - [FAM3C_HUMAN]                                     | 11.00 | 11.00 | 2.23 | 3.35 |
| ▲ | ▲ | O00264 | Membrane-associated progesterone receptor component 1 OS=Homo sapiens GN=PGRMC1 PE=1 SV=3 - [PGR     | 1.00  | 2.00  | 2.17 | 3.30 |
| ▲ | ▲ | Q86YW5 | Trem-like transcript 1 protein OS=Homo sapiens GN=TREML1 PE=1 SV=2 - [TRML1_HUMAN]                   | 2.00  | 2.00  | 3.37 | 3.29 |
| ▲ | ▲ | P01011 | Alpha-1-antichymotrypsin OS=Homo sapiens GN=SERPINA3 PE=1 SV=2 - [AACT_HUMAN]                        | 24.00 | 24.00 | 2.27 | 3.27 |
| ▲ | ▲ | Q15828 | Cystatin-M OS=Homo sapiens GN=CST6 PE=1 SV=1 - [CYTM_HUMAN]                                          | 7.00  | 7.00  | 2.64 | 3.27 |
| ▲ | ▲ | P43652 | Afamin OS=Homo sapiens GN=AFM PE=1 SV=1 - [AFAM_HUMAN]                                               | 33.00 | 33.00 | 2.41 | 3.26 |
| ▲ | ▲ | P29401 | Transketolase OS=Homo sapiens GN=TKT PE=1 SV=3 - [TKT_HUMAN]                                         | 10.00 | 10.00 | 2.01 | 3.23 |
| ▲ | ▲ | P02042 | Hemoglobin subunit delta OS=Homo sapiens GN=HBD PE=1 SV=2 - [HBD_HUMAN]                              | 5.00  | 10.00 | 2.78 | 3.18 |
| ▲ | ▲ | P21817 | Ryanodine receptor 1 OS=Homo sapiens GN=RYR1 PE=1 SV=3 - [RYR1_HUMAN]                                | 1.00  | 1.00  | 2.77 | 3.17 |
| ▲ | ▲ | Q9UHI8 | A disintegrin and metalloproteinase with thrombospondin motifs 1 OS=Homo sapiens GN=ADAMTS1 PE=1 SV  | 3.00  | 3.00  | 2.50 | 3.17 |
| ▲ | ▲ | P20160 | Azurocidin OS=Homo sapiens GN=AZU1 PE=1 SV=3 - [CAP7_HUMAN]                                          | 3.00  | 3.00  | 2.07 | 3.17 |
| ▲ | ▲ | P04114 | Apolipoprotein B-100 OS=Homo sapiens GN=APOB PE=1 SV=1 - [APOB_HUMAN]                                | 36.00 | 36.00 | 3.60 | 3.17 |
| ▲ | ▲ | Q8NHQ9 | ATP-dependent RNA helicase DDX55 OS=Homo sapiens GN=DDX55 PE=1 SV=3 - [DDX55_HUMAN]                  | 1.00  | 1.00  | 2.55 | 3.16 |

|   |   |        |                                                                                                        |       |       |      |      |
|---|---|--------|--------------------------------------------------------------------------------------------------------|-------|-------|------|------|
| ▲ | ▲ | Q99996 | A-kinase anchor protein 9 OS=Homo sapiens GN=AKAP9 PE=1 SV=3 - [AKAP9_HUMAN]                           | 1.00  | 1.00  | 4.16 | 3.15 |
| ▲ | ▲ | Q6UWW0 | Lipocalin-15 OS=Homo sapiens GN=LCN15 PE=2 SV=1 - [LCN15_HUMAN]                                        | 1.00  | 1.00  | 3.29 | 3.09 |
| ▲ | ▲ | Q13231 | Chitotriosidase-1 OS=Homo sapiens GN=CHIT1 PE=1 SV=1 - [CHIT1_HUMAN]                                   | 11.00 | 11.00 | 2.14 | 3.08 |
| ▲ | ▲ | Q99674 | Cell growth regulator with EF hand domain protein 1 OS=Homo sapiens GN=CGREF1 PE=2 SV=2 - [CGRE1_      | 5.00  | 5.00  | 2.03 | 3.07 |
| ▲ | ▲ | P10645 | Chromogranin-A OS=Homo sapiens GN=CHGA PE=1 SV=7 - [CMGA_HUMAN]                                        | 14.00 | 14.00 | 2.47 | 3.04 |
| ▲ | ▲ | Q15363 | Transmembrane emp24 domain-containing protein 2 OS=Homo sapiens GN=TMED2 PE=1 SV=1 - [TMED2_H          | 1.00  | 1.00  | 2.20 | 3.03 |
| ▲ | ▲ | P51693 | Amyloid-like protein 1 OS=Homo sapiens GN=APLP1 PE=1 SV=3 - [APLP1_HUMAN]                              | 3.00  | 3.00  | 2.65 | 3.03 |
| ▲ | ▲ | Q9UHB6 | LIM domain and actin-binding protein 1 OS=Homo sapiens GN=LIMA1 PE=1 SV=1 - [LIMA1_HUMAN]              | 1.00  | 1.00  | 2.14 | 3.02 |
| ▲ | ▲ | P08254 | Stromelysin-1 OS=Homo sapiens GN=MMP3 PE=1 SV=2 - [MMP3_HUMAN]                                         | 1.00  | 1.00  | 2.40 | 2.96 |
| ▲ | ▲ | Q9UF56 | F-box/LRR-repeat protein 17 OS=Homo sapiens GN=FBXL17 PE=2 SV=3 - [FXL17_HUMAN]                        | 1.00  | 1.00  | 2.54 | 2.96 |
| ▲ | ▲ | P52799 | Ephrin-B2 OS=Homo sapiens GN=EFNB2 PE=1 SV=1 - [EFNB2_HUMAN]                                           | 7.00  | 7.00  | 2.07 | 2.84 |
| ▲ | ▲ | P12104 | Fatty acid-binding protein, intestinal OS=Homo sapiens GN=FABP2 PE=1 SV=2 - [FABPI_HUMAN]              | 3.00  | 3.00  | 3.07 | 2.79 |
| ▲ | ▲ | P02788 | Lactotransferrin OS=Homo sapiens GN=LTF PE=1 SV=6 - [TRFL_HUMAN]                                       | 38.00 | 38.00 | 3.09 | 2.78 |
| ▲ | ▲ | P15085 | Carboxypeptidase A1 OS=Homo sapiens GN=CPA1 PE=1 SV=2 - [CBPA1_HUMAN]                                  | 7.00  | 7.00  | 2.31 | 2.73 |
| ▲ | ▲ | P68871 | Hemoglobin subunit beta OS=Homo sapiens GN=HBB PE=1 SV=2 - [HBB_HUMAN]                                 | 8.00  | 13.00 | 3.15 | 2.72 |
| ▲ | ▲ | P06317 | Ig lambda chain V-VI region SUT OS=Homo sapiens PE=1 SV=1 - [LV603_HUMAN]                              | 1.00  | 1.00  | 2.44 | 2.72 |
| ▲ | ▲ | Q14165 | Malectin OS=Homo sapiens GN=MLEC PE=1 SV=1 - [MLEC_HUMAN]                                              | 4.00  | 4.00  | 2.02 | 2.70 |
| ▲ | ▲ | P01714 | Ig lambda chain V-III region SH OS=Homo sapiens PE=1 SV=1 - [LV301_HUMAN]                              | 1.00  | 1.00  | 2.33 | 2.67 |
| ▲ | ▲ | P01622 | Ig kappa chain V-III region Ti OS=Homo sapiens PE=1 SV=1 - [KV304_HUMAN]                               | 2.00  | 7.00  | 2.14 | 2.64 |
| ▲ | ▲ | Q7Z4P5 | Growth/differentiation factor 7 OS=Homo sapiens GN=GDF7 PE=2 SV=2 - [GDF7_HUMAN]                       | 1.00  | 1.00  | 2.21 | 2.62 |
| ▲ | ▲ | P69905 | Hemoglobin subunit alpha OS=Homo sapiens GN=HBA1 PE=1 SV=2 - [HBA_HUMAN]                               | 7.00  | 7.00  | 2.53 | 2.61 |
| ▲ | ▲ | Q9H8J5 | MANSC domain-containing protein 1 OS=Homo sapiens GN=MANSC1 PE=2 SV=1 - [MANS1_HUMAN]                  | 4.00  | 4.00  | 2.32 | 2.58 |
| ▲ | ▲ | Q86UP2 | Kinectin OS=Homo sapiens GN=KTN1 PE=1 SV=1 - [KTN1_HUMAN]                                              | 1.00  | 1.00  | 2.14 | 2.57 |
| ▲ | ▲ | P01602 | Ig kappa chain V-I region HK102 (Fragment) OS=Homo sapiens GN=IGKV1-5 PE=4 SV=1 - [KV110_HUMA          | 2.00  | 2.00  | 2.65 | 2.53 |
| ▲ | ▲ | Q6UY14 | ADAMTS-like protein 4 OS=Homo sapiens GN=ADAMTSL4 PE=1 SV=2 - [ATL4_HUMAN]                             | 7.00  | 7.00  | 2.33 | 2.53 |
| ▲ | ▲ | Q15485 | Ficolin-2 OS=Homo sapiens GN=FCN2 PE=1 SV=2 - [FCN2_HUMAN]                                             | 3.00  | 3.00  | 3.71 | 2.53 |
| ▲ | ▲ | Q16661 | Guanylate cyclase activator 2B OS=Homo sapiens GN=GUCA2B PE=1 SV=1 - [GUC2B_HUMAN]                     | 4.00  | 4.00  | 2.77 | 2.50 |
| ▲ | ▲ | Q8NBS9 | Thioredoxin domain-containing protein 5 OS=Homo sapiens GN=TXNDC5 PE=1 SV=2 - [TXND5_HUMAN]            | 11.00 | 11.00 | 2.54 | 2.49 |
| ▲ | ▲ | P00450 | Ceruloplasmin OS=Homo sapiens GN=CP PE=1 SV=1 - [CERU_HUMAN]                                           | 43.00 | 43.00 | 2.14 | 2.47 |
| ▲ | ▲ | P04217 | Alpha-1B-glycoprotein OS=Homo sapiens GN=A1BG PE=1 SV=3 - [A1BG_HUMAN]                                 | 14.00 | 14.00 | 2.31 | 2.41 |
| ▲ | ▲ | P57087 | Junctional adhesion molecule B OS=Homo sapiens GN=JAM2 PE=1 SV=1 - [JAM2_HUMAN]                        | 1.00  | 1.00  | 2.20 | 2.37 |
| ▲ | ▲ | Q6UWJ1 | Transmembrane and coiled-coil domain-containing protein 3 OS=Homo sapiens GN=TMCO3 PE=2 SV=1 - [TM     | 1.00  | 1.00  | 2.14 | 2.35 |
| ▲ | ▲ | P01781 | Ig heavy chain V-III region GAL OS=Homo sapiens PE=1 SV=1 - [HV320_HUMAN]                              | 3.00  | 3.00  | 2.09 | 2.33 |
| ▲ | ▲ | P14780 | Matrix metalloproteinase-9 OS=Homo sapiens GN=MMP9 PE=1 SV=3 - [MMP9_HUMAN]                            | 16.00 | 16.00 | 2.05 | 2.32 |
| ▲ | ▲ | Q02747 | Guanylin OS=Homo sapiens GN=GUCA2A PE=1 SV=2 - [GUC2A_HUMAN]                                           | 4.00  | 4.00  | 3.13 | 2.32 |
| ▲ | ▲ | P52848 | Bifunctional heparan sulfate N-deacetylase/N-sulfotransferase 1 OS=Homo sapiens GN=NDST1 PE=1 SV=1 - [ | 1.00  | 1.00  | 2.60 | 2.31 |

|   |   |                                                         |                                                                                                                              |       |       |      |      |
|---|---|---------------------------------------------------------|------------------------------------------------------------------------------------------------------------------------------|-------|-------|------|------|
| ▲ | ▲ | Q86YD5                                                  | Low-density lipoprotein receptor class A domain-containing protein 3 OS=Homo sapiens GN=LDLRAD3 PE=2                         | 1.00  | 1.00  | 2.44 | 2.31 |
| ▲ | ▲ | P01767                                                  | Ig heavy chain V-III region BUT OS=Homo sapiens PE=1 SV=1 - [HV306_HUMAN]                                                    | 2.00  | 3.00  | 2.25 | 2.30 |
| ▲ | ▲ | O95711                                                  | Lymphocyte antigen 86 OS=Homo sapiens GN=LY86 PE=1 SV=1 - [LY86_HUMAN]                                                       | 1.00  | 1.00  | 2.39 | 2.24 |
| ▲ | ▲ | Q6P3W7                                                  | SCY1-like protein 2 OS=Homo sapiens GN=SCYL2 PE=1 SV=1 - [SCYL2_HUMAN]                                                       | 1.00  | 1.00  | 2.25 | 2.22 |
| ▲ | ▲ | Q2NL68                                                  | Uncharacterized protein C19orf55 OS=Homo sapiens GN=C19orf55 PE=2 SV=1 - [CS055_HUMAN]                                       | 1.00  | 1.00  | 3.01 | 2.18 |
| ▲ | ▲ | Q9NQ55                                                  | Suppressor of SWI4 1 homolog OS=Homo sapiens GN=PPAN PE=1 SV=1 - [SSF1_HUMAN]                                                | 1.00  | 1.00  | 2.15 | 2.13 |
| ▲ | ▲ | Q9H6B4                                                  | Adipocyte adhesion molecule OS=Homo sapiens GN=ACAM PE=1 SV=1 - [ACAM_HUMAN]                                                 | 3.00  | 3.00  | 2.57 | 2.13 |
| ▲ | ▲ | O43405                                                  | Cochlin OS=Homo sapiens GN=COCH PE=1 SV=1 - [COCH_HUMAN]                                                                     | 2.00  | 2.00  | 2.51 | 2.08 |
| ▲ | ▲ | Q9NWX4                                                  | UPF0587 protein C1orf123 OS=Homo sapiens GN=C1orf123 PE=1 SV=1 - [CA123_HUMAN]                                               | 3.00  | 3.00  | 2.01 | 2.05 |
| ▲ | ▲ | P01766                                                  | Ig heavy chain V-III region BRO OS=Homo sapiens PE=1 SV=1 - [HV305_HUMAN]                                                    | 1.00  | 2.00  | 2.11 | 2.03 |
| ▲ | ▲ | P01765                                                  | Ig heavy chain V-III region TIL OS=Homo sapiens PE=1 SV=1 - [HV304_HUMAN]                                                    | 1.00  | 2.00  | 2.27 | 2.01 |
| ▲ | ▲ | O95502                                                  | Neuronal pentraxin receptor OS=Homo sapiens GN=NPTXR PE=2 SV=2 - [NPTXR_HUMAN]                                               | 1.00  | 1.00  | 2.17 | 2.00 |
| ▲ | ▲ | P01876                                                  | Ig alpha-1 chain C region OS=Homo sapiens GN=IGHA1 PE=1 SV=2 - [IGHA1_HUMAN]                                                 | 7.00  | 16.00 | 2.09 | 2.00 |
|   |   | <b>Up-Regulated Proteins in any one Subgroups (400)</b> |                                                                                                                              |       |       |      |      |
| ▲ |   | Q6N063                                                  | 2-oxoglutarate and iron-dependent oxygenase domain-containing protein 2 OS=Homo sapiens GN=OGFOD2 PE=1 SV=1 - [OGFOD2_HUMAN] | 1.00  | 1.00  | 3.03 | 1.98 |
| ▲ |   | P00915                                                  | Carbonic anhydrase 1 OS=Homo sapiens GN=CA1 PE=1 SV=2 - [CAH1_HUMAN]                                                         | 14.00 | 14.00 | 2.20 | 1.97 |
| ▲ |   | P01275                                                  | Glucagon OS=Homo sapiens GN=GCG PE=1 SV=3 - [GLUC_HUMAN]                                                                     | 1.00  | 1.00  | 4.15 | 1.94 |
| ▲ |   | P04216                                                  | Thy-1 membrane glycoprotein OS=Homo sapiens GN=THY1 PE=1 SV=2 - [THY1_HUMAN]                                                 | 4.00  | 4.00  | 2.25 | 1.93 |
| ▲ |   | Q9UBR2                                                  | Cathepsin Z OS=Homo sapiens GN=CTSZ PE=1 SV=1 - [CATZ_HUMAN]                                                                 | 8.00  | 8.00  | 2.12 | 1.91 |
| ▲ |   | P00736                                                  | Complement C1r subcomponent OS=Homo sapiens GN=C1R PE=1 SV=2 - [C1R_HUMAN]                                                   | 3.00  | 4.00  | 2.94 | 1.83 |
| ▲ |   | P69891                                                  | Hemoglobin subunit gamma-1 OS=Homo sapiens GN=HBG1 PE=1 SV=2 - [HBG1_HUMAN]                                                  | 1.00  | 2.00  | 2.20 | 1.83 |
| ▲ |   | P05451                                                  | Lithostathine-1-alpha OS=Homo sapiens GN=REG1A PE=1 SV=3 - [REG1A_HUMAN]                                                     | 7.00  | 11.00 | 2.64 | 1.71 |
| ▲ |   | P01611                                                  | Ig kappa chain V-I region Wes OS=Homo sapiens PE=1 SV=1 - [KV119_HUMAN]                                                      | 1.00  | 1.00  | 2.01 | 1.70 |
| ▲ |   | P01601                                                  | Ig kappa chain V-I region HK101 (Fragment) OS=Homo sapiens PE=4 SV=1 - [KV109_HUMAN]                                         | 1.00  | 1.00  | 2.33 | 1.68 |
| ▲ |   | P12110                                                  | Collagen alpha-2(VI) chain OS=Homo sapiens GN=COL6A2 PE=1 SV=4 - [CO6A2_HUMAN]                                               | 5.00  | 5.00  | 2.00 | 1.63 |
| ▲ |   | P02763                                                  | Alpha-1-acid glycoprotein 1 OS=Homo sapiens GN=ORM1 PE=1 SV=1 - [A1AG1_HUMAN]                                                | 12.00 | 20.00 | 2.27 | 1.57 |
| ▲ |   | P15018                                                  | Leukemia inhibitory factor OS=Homo sapiens GN=LIF PE=1 SV=1 - [LIF_HUMAN]                                                    | 1.00  | 1.00  | 3.10 | 1.53 |
| ▲ |   | P06314                                                  | Ig kappa chain V-IV region B17 OS=Homo sapiens PE=2 SV=1 - [KV404_HUMAN]                                                     | 1.00  | 6.00  | 2.82 | 1.50 |
| ▲ |   | A6NI79                                                  | Coiled-coil domain-containing protein 69 OS=Homo sapiens GN=CCDC69 PE=2 SV=1 - [CCD69_HUMAN]                                 | 1.00  | 1.00  | 2.66 | 1.47 |
| ▲ |   | Q8NI35                                                  | InaD-like protein OS=Homo sapiens GN=INADL PE=1 SV=3 - [INADL_HUMAN]                                                         | 1.00  | 1.00  | 2.10 | 1.44 |
| ▲ |   | Q8TDL5                                                  | Long palate, lung and nasal epithelium carcinoma-associated protein 1 OS=Homo sapiens GN=LPLUNC1 PE=2 SV=1 - [LPLUNC1_HUMAN] | 2.00  | 2.00  | 2.11 | 1.44 |
| ▲ |   | P04211                                                  | Ig lambda chain V region 4A OS=Homo sapiens PE=4 SV=1 - [LV001_HUMAN]                                                        | 1.00  | 1.00  | 2.12 | 1.44 |
| ▲ |   | Q9Y2I9                                                  | TBC1 domain family member 30 OS=Homo sapiens GN=TBC1D30 PE=2 SV=2 - [TBC30_HUMAN]                                            | 1.00  | 1.00  | 3.01 | 1.41 |
| ▲ |   | Q15699                                                  | ALX homeobox protein 1 OS=Homo sapiens GN=ALX1 PE=1 SV=2 - [ALX1_HUMAN]                                                      | 1.00  | 1.00  | 2.31 | 1.39 |
| ▲ |   | O60635                                                  | Tetraspanin-1 OS=Homo sapiens GN=TSPAN1 PE=1 SV=2 - [TSN1_HUMAN]                                                             | 2.00  | 2.00  | 4.71 | 1.35 |
| ▲ |   | P40926                                                  | Malate dehydrogenase, mitochondrial OS=Homo sapiens GN=MDH2 PE=1 SV=3 - [MDHM_HUMAN]                                         | 4.00  | 4.00  | 2.18 | 1.32 |

|   |   |        |                                                                                                                             |      |      |       |       |
|---|---|--------|-----------------------------------------------------------------------------------------------------------------------------|------|------|-------|-------|
| ▲ |   | P03973 | Antileukoproteinase OS=Homo sapiens GN=SLPI PE=1 SV=2 - [SLPI_HUMAN]                                                        | 5.00 | 5.00 | 2.09  | 1.31  |
| ▲ |   | P01709 | Ig lambda chain V-II region MGC OS=Homo sapiens PE=1 SV=1 - [LV206_HUMAN]                                                   | 1.00 | 2.00 | 2.15  | 1.28  |
| ▲ |   | P42765 | 3-ketoacyl-CoA thiolase, mitochondrial OS=Homo sapiens GN=ACAA2 PE=1 SV=2 - [THIM_HUMAN]                                    | 2.00 | 2.00 | 2.25  | 1.28  |
| ▲ |   | Q02383 | Semenogelin-2 OS=Homo sapiens GN=SEMG2 PE=1 SV=1 - [SEMG2_HUMAN]                                                            | 8.00 | 9.00 | 10.60 | 1.25  |
| ▲ |   | Q8WVN6 | Secreted and transmembrane protein 1 OS=Homo sapiens GN=SECTM1 PE=1 SV=2 - [SCTM1_HUMAN]                                    | 4.00 | 4.00 | 2.18  | 1.22  |
| ▲ |   | P30084 | Enoyl-CoA hydratase, mitochondrial OS=Homo sapiens GN=ECHS1 PE=1 SV=4 - [ECHM_HUMAN]                                        | 2.00 | 2.00 | 2.21  | 1.11  |
| ▲ |   | Q9Y3B3 | Transmembrane emp24 domain-containing protein 7 OS=Homo sapiens GN=TMED7 PE=1 SV=2 - [TMED7_HUMAN]                          | 1.00 | 1.00 | 2.37  | 1.07  |
| ▲ |   | Q86V85 | Integral membrane protein GPR180 OS=Homo sapiens GN=GPR180 PE=2 SV=1 - [GP180_HUMAN]                                        | 2.00 | 2.00 | 2.65  | 1.04  |
| ▲ |   | Q5UCC4 | UPF0510 protein INM02 OS=Homo sapiens GN=C19orf63 PE=1 SV=1 - [INM02_HUMAN]                                                 | 1.00 | 1.00 | 2.06  | 1.01  |
| ▲ |   | Q9ULV1 | Frizzled-4 OS=Homo sapiens GN=FZD4 PE=1 SV=2 - [FZD4_HUMAN]                                                                 | 1.00 | 1.00 | 2.25  | 0.99  |
| ▲ |   | P04279 | Semenogelin-1 OS=Homo sapiens GN=SEMG1 PE=1 SV=2 - [SEMG1_HUMAN]                                                            | 5.00 | 6.00 | 20.55 | 0.92  |
| ▲ |   | Q96M29 | Tektin-5 OS=Homo sapiens GN=TEKT5 PE=2 SV=1 - [TEKT5_HUMAN]                                                                 | 1.00 | 1.00 | 2.54  | 0.82  |
| ▲ |   | P49788 | Retinoic acid receptor responder protein 1 OS=Homo sapiens GN=RARRES1 PE=2 SV=2 - [TIG1_HUMAN]                              | 1.00 | 1.00 | 2.60  | 0.81  |
| ▲ |   | P06576 | ATP synthase subunit beta, mitochondrial OS=Homo sapiens GN=ATP5B PE=1 SV=3 - [ATPB_HUMAN]                                  | 1.00 | 1.00 | 2.01  | 0.74  |
| ▲ |   | Q02252 | Methylmalonate-semialdehyde dehydrogenase [acylating], mitochondrial OS=Homo sapiens GN=ALDH6A1 PE=1 SV=1 - [ALDH6A1_HUMAN] | 1.00 | 1.00 | 3.46  | 0.71  |
| ▲ |   | Q9H227 | Cytosolic beta-glucosidase OS=Homo sapiens GN=GBA3 PE=1 SV=2 - [GBA3_HUMAN]                                                 | 1.00 | 1.00 | 7.48  | 0.60  |
| ▲ |   | P55083 | Microfibril-associated glycoprotein 4 OS=Homo sapiens GN=MFAP4 PE=1 SV=2 - [MFAP4_HUMAN]                                    | 1.00 | 1.00 | 2.52  | 0.52  |
|   | ▲ | P62857 | 40S ribosomal protein S28 OS=Homo sapiens GN=RPS28 PE=1 SV=1 - [RS28_HUMAN]                                                 | 2.00 | 2.00 | 1.80  | 29.83 |
|   | ▲ | P02656 | Apolipoprotein C-III OS=Homo sapiens GN=APOC3 PE=1 SV=1 - [APOC3_HUMAN]                                                     | 4.00 | 4.00 | 1.67  | 15.13 |
|   | ▲ | P30049 | ATP synthase subunit delta, mitochondrial OS=Homo sapiens GN=ATP5D PE=1 SV=2 - [ATPD_HUMAN]                                 | 1.00 | 1.00 | 1.23  | 13.21 |
|   | ▲ | P08493 | Matrix Gla protein OS=Homo sapiens GN=MGP PE=1 SV=2 - [MGP_HUMAN]                                                           | 1.00 | 1.00 | 1.44  | 13.18 |
|   | ▲ | P01160 | Atrial natriuretic factor OS=Homo sapiens GN=NPPA PE=1 SV=1 - [ANF_HUMAN]                                                   | 1.00 | 1.00 | 1.79  | 13.15 |
|   | ▲ | P07951 | Tropomyosin beta chain OS=Homo sapiens GN=TPM2 PE=1 SV=1 - [TPM2_HUMAN]                                                     | 2.00 | 7.00 | 1.89  | 13.03 |
|   | ▲ | O75208 | Ubiquinone biosynthesis protein COQ9, mitochondrial OS=Homo sapiens GN=COQ9 PE=1 SV=1 - [COQ9_HUMAN]                        | 1.00 | 1.00 |       | 11.88 |
|   | ▲ | Q01995 | Transgelin OS=Homo sapiens GN=TAGLN PE=1 SV=4 - [TAGL_HUMAN]                                                                | 9.00 | 9.00 | 1.72  | 11.76 |
|   | ▲ | P36578 | 60S ribosomal protein L4 OS=Homo sapiens GN=RPL4 PE=1 SV=5 - [RL4_HUMAN]                                                    | 1.00 | 1.00 | 1.48  | 11.75 |
|   | ▲ | P20962 | Parathymosin OS=Homo sapiens GN=PTMS PE=1 SV=2 - [PTMS_HUMAN]                                                               | 3.00 | 3.00 | 1.16  | 11.70 |
|   | ▲ | P31327 | Carbamoyl-phosphate synthase [ammonia], mitochondrial OS=Homo sapiens GN=CPS1 PE=1 SV=2 - [CPSM_HUMAN]                      | 1.00 | 1.00 | 1.03  | 11.07 |
|   | ▲ | O75381 | Peroxisomal membrane protein PEX14 OS=Homo sapiens GN=PEX14 PE=1 SV=1 - [PEX14_HUMAN]                                       | 1.00 | 1.00 | 1.66  | 10.63 |
|   | ▲ | Q8WUJ0 | Serine/threonine/tyrosine-interacting protein OS=Homo sapiens GN=STYX PE=1 SV=1 - [STYX_HUMAN]                              | 1.00 | 1.00 | 1.91  | 9.84  |
|   | ▲ | P51460 | Insulin-like 3 OS=Homo sapiens GN=INSL3 PE=1 SV=1 - [INSL3_HUMAN]                                                           | 1.00 | 1.00 | 1.41  | 9.09  |
|   | ▲ | P07108 | Acyl-CoA-binding protein OS=Homo sapiens GN=DBI PE=1 SV=2 - [ACBP_HUMAN]                                                    | 5.00 | 5.00 | 1.42  | 9.01  |
|   | ▲ | P07148 | Fatty acid-binding protein, liver OS=Homo sapiens GN=FABP1 PE=1 SV=1 - [FABPL_HUMAN]                                        | 9.00 | 9.00 | 1.59  | 8.14  |
|   | ▲ | P18428 | Lipopolysaccharide-binding protein OS=Homo sapiens GN=LBP PE=1 SV=3 - [LBP_HUMAN]                                           | 8.00 | 8.00 | 1.73  | 8.14  |
|   | ▲ | Q8NBP7 | Proprotein convertase subtilisin/kexin type 9 OS=Homo sapiens GN=PCSK9 PE=1 SV=2 - [PCSK9_HUMAN]                            | 1.00 | 1.00 | 1.68  | 7.86  |
|   | ▲ | Q66K74 | Microtubule-associated protein 1S OS=Homo sapiens GN=MAP1S PE=1 SV=2 - [MAP1S_HUMAN]                                        | 1.00 | 1.00 | 1.70  | 7.75  |

|  |   |        |                                                                                                    |       |       |      |      |
|--|---|--------|----------------------------------------------------------------------------------------------------|-------|-------|------|------|
|  | ▲ | Q16595 | Frataxin, mitochondrial OS=Homo sapiens GN=FXN PE=1 SV=2 - [FRDA_HUMAN]                            | 2.00  | 2.00  | 1.29 | 7.74 |
|  | ▲ | P01185 | Vasopressin-neurophysin 2-copeptin OS=Homo sapiens GN=AVP PE=1 SV=2 - [NEU2_HUMAN]                 | 1.00  | 2.00  | 1.46 | 7.70 |
|  | ▲ | P22692 | Insulin-like growth factor-binding protein 4 OS=Homo sapiens GN=IGFBP4 PE=1 SV=2 - [IBP4_HUMAN]    | 8.00  | 8.00  | 1.92 | 7.66 |
|  | ▲ | Q05315 | Eosinophil lysophospholipase OS=Homo sapiens GN=CLC PE=1 SV=2 - [LPPL_HUMAN]                       | 1.00  | 1.00  | 1.78 | 7.65 |
|  | ▲ | P39019 | 40S ribosomal protein S19 OS=Homo sapiens GN=RPS19 PE=1 SV=2 - [RS19_HUMAN]                        | 1.00  | 1.00  | 1.01 | 7.62 |
|  | ▲ | P23434 | Glycine cleavage system H protein, mitochondrial OS=Homo sapiens GN=GCSH PE=1 SV=1 - [GCSH_HUMAN]  | 2.00  | 2.00  | 1.27 | 7.43 |
|  | ▲ | O95456 | Proteasome assembly chaperone 1 OS=Homo sapiens GN=PSMG1 PE=1 SV=1 - [PSMG1_HUMAN]                 | 1.00  | 1.00  | 1.21 | 7.18 |
|  | ▲ | Q14520 | Hyaluronan-binding protein 2 OS=Homo sapiens GN=HABP2 PE=1 SV=1 - [HABP2_HUMAN]                    | 4.00  | 4.00  | 1.94 | 7.13 |
|  | ▲ | O00515 | Ladinin-1 OS=Homo sapiens GN=LAD1 PE=1 SV=2 - [LAD1_HUMAN]                                         | 2.00  | 2.00  | 1.52 | 6.99 |
|  | ▲ | Q99541 | Perilipin-2 OS=Homo sapiens GN=PLIN2 PE=1 SV=2 - [PLIN2_HUMAN]                                     | 1.00  | 1.00  | 1.37 | 6.93 |
|  | ▲ | P10644 | cAMP-dependent protein kinase type I-alpha regulatory subunit OS=Homo sapiens GN=PRKAR1A PE=1 SV=1 | 2.00  | 2.00  | 1.80 | 6.85 |
|  | ▲ | P01880 | Ig delta chain C region OS=Homo sapiens GN=IGHD PE=1 SV=2 - [IGHD_HUMAN]                           | 5.00  | 5.00  | 1.77 | 6.79 |
|  | ▲ | Q16663 | C-C motif chemokine 15 OS=Homo sapiens GN=CCL15 PE=1 SV=2 - [CCL15_HUMAN]                          | 1.00  | 1.00  | 1.44 | 6.77 |
|  | ▲ | Q93091 | Ribonuclease K6 OS=Homo sapiens GN=RNASE6 PE=1 SV=2 - [RNASE6_HUMAN]                               | 1.00  | 1.00  | 1.81 | 6.73 |
|  | ▲ | P61960 | Ubiquitin-fold modifier 1 OS=Homo sapiens GN=UFM1 PE=1 SV=1 - [UFM1_HUMAN]                         | 3.00  | 3.00  | 1.79 | 6.72 |
|  | ▲ | P26885 | Peptidyl-prolyl cis-trans isomerase FKBP2 OS=Homo sapiens GN=FKBP2 PE=1 SV=2 - [FKBP2_HUMAN]       | 2.00  | 2.00  | 1.99 | 6.71 |
|  | ▲ | P34096 | Ribonuclease 4 OS=Homo sapiens GN=RNASE4 PE=1 SV=3 - [RNASE4_HUMAN]                                | 4.00  | 4.00  | 1.42 | 6.53 |
|  | ▲ | P41159 | Leptin OS=Homo sapiens GN=LEP PE=1 SV=1 - [LEP_HUMAN]                                              | 3.00  | 3.00  | 1.75 | 6.47 |
|  | ▲ | Q16762 | Thiosulfate sulfurtransferase OS=Homo sapiens GN=TST PE=1 SV=4 - [THTR_HUMAN]                      | 3.00  | 3.00  | 1.69 | 6.36 |
|  | ▲ | Q96NZ9 | Proline-rich acidic protein 1 OS=Homo sapiens GN=PRAP1 PE=2 SV=1 - [PRAP1_HUMAN]                   | 5.00  | 5.00  | 1.68 | 6.25 |
|  | ▲ | P46952 | 3-hydroxyanthranilate 3,4-dioxygenase OS=Homo sapiens GN=HAAO PE=1 SV=1 - [3HAO_HUMAN]             | 9.00  | 9.00  | 1.39 | 6.07 |
|  | ▲ | P06681 | Complement C2 OS=Homo sapiens GN=C2 PE=1 SV=2 - [CO2_HUMAN]                                        | 15.00 | 15.00 | 1.90 | 5.97 |
|  | ▲ | Q13790 | Apolipoprotein F OS=Homo sapiens GN=APOF PE=1 SV=1 - [APOF_HUMAN]                                  | 4.00  | 4.00  | 1.92 | 5.92 |
|  | ▲ | P00441 | Superoxide dismutase [Cu-Zn] OS=Homo sapiens GN=SOD1 PE=1 SV=2 - [SODC_HUMAN]                      | 12.00 | 12.00 | 1.77 | 5.91 |
|  | ▲ | P07360 | Complement component C8 gamma chain OS=Homo sapiens GN=C8G PE=1 SV=3 - [CO8G_HUMAN]                | 9.00  | 9.00  | 1.98 | 5.90 |
|  | ▲ | P02735 | Serum amyloid A protein OS=Homo sapiens GN=SAA1 PE=1 SV=2 - [SAA_HUMAN]                            | 6.00  | 6.00  | 1.60 | 5.89 |
|  | ▲ | P04732 | Metallothionein-1E OS=Homo sapiens GN=MT1E PE=1 SV=1 - [MT1E_HUMAN]                                | 1.00  | 2.00  | 1.49 | 5.88 |
|  | ▲ | P62750 | 60S ribosomal protein L23a OS=Homo sapiens GN=RPL23A PE=1 SV=1 - [RL23A_HUMAN]                     | 1.00  | 1.00  | 0.76 | 5.87 |
|  | ▲ | Q9NQ76 | Matrix extracellular phosphoglycoprotein OS=Homo sapiens GN=MEPE PE=1 SV=1 - [MEPE_HUMAN]          | 3.00  | 3.00  | 1.67 | 5.87 |
|  | ▲ | P02655 | Apolipoprotein C-II OS=Homo sapiens GN=APOC2 PE=1 SV=1 - [APOC2_HUMAN]                             | 4.00  | 4.00  | 1.93 | 5.86 |
|  | ▲ | Q49AM3 | Tetratricopeptide repeat protein 31 OS=Homo sapiens GN=TTC31 PE=2 SV=3 - [TTC31_HUMAN]             | 1.00  | 1.00  | 1.84 | 5.77 |
|  | ▲ | P80297 | Metallothionein-1X OS=Homo sapiens GN=MT1X PE=1 SV=1 - [MT1X_HUMAN]                                | 2.00  | 3.00  | 1.26 | 5.77 |
|  | ▲ | P07357 | Complement component C8 alpha chain OS=Homo sapiens GN=C8A PE=1 SV=2 - [CO8A_HUMAN]                | 10.00 | 10.00 | 1.86 | 5.71 |
|  | ▲ | P30046 | D-dopachrome decarboxylase OS=Homo sapiens GN=DDT PE=1 SV=3 - [DOPD_HUMAN]                         | 4.00  | 4.00  | 1.13 | 5.69 |
|  | ▲ | Q99757 | Thioredoxin, mitochondrial OS=Homo sapiens GN=TXN2 PE=1 SV=2 - [THIOM_HUMAN]                       | 3.00  | 3.00  | 1.70 | 5.66 |
|  | ▲ | P20810 | Calpastatin OS=Homo sapiens GN=CAST PE=1 SV=4 - [ICAL_HUMAN]                                       | 3.00  | 3.00  | 1.82 | 5.64 |



|  |   |        |                                                                                                       |       |       |      |      |
|--|---|--------|-------------------------------------------------------------------------------------------------------|-------|-------|------|------|
|  | ▲ | P36222 | Chitinase-3-like protein 1 OS=Homo sapiens GN=CHI3L1 PE=1 SV=2 - [CH3L1_HUMAN]                        | 10.00 | 10.00 | 1.54 | 5.61 |
|  | ▲ | P02654 | Apolipoprotein C-I OS=Homo sapiens GN=APOC1 PE=1 SV=1 - [APOC1_HUMAN]                                 | 4.00  | 4.00  | 1.80 | 5.53 |
|  | ▲ | Q9NYJ1 | Coiled-coil-helix-coiled-coil-helix domain-containing protein 8 OS=Homo sapiens GN=CHCHD8 PE=1 SV=2 - | 1.00  | 1.00  | 1.39 | 5.51 |
|  | ▲ | Q15493 | Regucalcin OS=Homo sapiens GN=RGN PE=1 SV=1 - [RGN_HUMAN]                                             | 7.00  | 7.00  | 0.73 | 5.48 |
|  | ▲ | Q02878 | 60S ribosomal protein L6 OS=Homo sapiens GN=RPL6 PE=1 SV=3 - [RL6_HUMAN]                              | 1.00  | 1.00  | 1.43 | 5.38 |
|  | ▲ | P20848 | Putative alpha-1-antitrypsin-related protein OS=Homo sapiens GN=SERPINA2 PE=5 SV=1 - [A1ATR_HUMA]     | 1.00  | 2.00  | 1.56 | 5.35 |
|  | ▲ | P15502 | Elastin OS=Homo sapiens GN=ELN PE=1 SV=2 - [ELN_HUMAN]                                                | 2.00  | 2.00  | 1.63 | 5.30 |
|  | ▲ | Q03591 | Complement factor H-related protein 1 OS=Homo sapiens GN=CFHR1 PE=1 SV=2 - [FHR1_HUMAN]               | 2.00  | 8.00  | 1.92 | 5.29 |
|  | ▲ | Q06141 | Regenerating islet-derived protein 3-alpha OS=Homo sapiens GN=REG3A PE=1 SV=1 - [REG3A_HUMAN]         | 3.00  | 3.00  | 1.90 | 5.15 |
|  | ▲ | Q9HCB6 | Spondin-1 OS=Homo sapiens GN=SPON1 PE=1 SV=2 - [SPON1_HUMAN]                                          | 2.00  | 2.00  | 1.37 | 5.05 |
|  | ▲ | P10109 | Adrenodoxin, mitochondrial OS=Homo sapiens GN=FDX1 PE=1 SV=1 - [ADX_HUMAN]                            | 4.00  | 4.00  | 0.75 | 5.05 |
|  | ▲ | P00746 | Complement factor D OS=Homo sapiens GN=CFD PE=1 SV=5 - [CFAD_HUMAN]                                   | 12.00 | 12.00 | 1.92 | 5.04 |
|  | ▲ | P01009 | Alpha-1-antitrypsin OS=Homo sapiens GN=SERPINA1 PE=1 SV=3 - [A1AT_HUMAN]                              | 34.00 | 35.00 | 1.66 | 5.03 |
|  | ▲ | P61923 | Coatomer subunit zeta-1 OS=Homo sapiens GN=COPZ1 PE=1 SV=1 - [COPZ1_HUMAN]                            | 1.00  | 1.00  | 1.22 | 5.02 |
|  | ▲ | O95810 | Serum deprivation-response protein OS=Homo sapiens GN=SDPR PE=1 SV=3 - [SDPR_HUMAN]                   | 2.00  | 2.00  | 1.79 | 5.02 |
|  | ▲ | O15204 | ADAM DEC1 OS=Homo sapiens GN=ADAMDEC1 PE=1 SV=2 - [ADEC1_HUMAN]                                       | 2.00  | 2.00  | 1.48 | 4.99 |
|  | ▲ | Q12874 | Splicing factor 3A subunit 3 OS=Homo sapiens GN=SF3A3 PE=1 SV=1 - [SF3A3_HUMAN]                       | 1.00  | 1.00  | 1.33 | 4.96 |
|  | ▲ | P01860 | Ig gamma-3 chain C region OS=Homo sapiens GN=IGHG3 PE=1 SV=2 - [IGHG3_HUMAN]                          | 7.00  | 17.00 | 1.90 | 4.92 |
|  | ▲ | P07358 | Complement component C8 beta chain OS=Homo sapiens GN=C8B PE=1 SV=3 - [CO8B_HUMAN]                    | 6.00  | 6.00  | 1.49 | 4.91 |
|  | ▲ | P11686 | Pulmonary surfactant-associated protein C OS=Homo sapiens GN=SFTPC PE=1 SV=2 - [PSPC_HUMAN]           | 1.00  | 1.00  | 1.04 | 4.91 |
|  | ▲ | Q9UNH7 | Sorting nexin-6 OS=Homo sapiens GN=SNX6 PE=1 SV=1 - [SNX6_HUMAN]                                      | 1.00  | 1.00  | 1.28 | 4.86 |
|  | ▲ | P09382 | Galectin-1 OS=Homo sapiens GN=LGALS1 PE=1 SV=2 - [LEG1_HUMAN]                                         | 3.00  | 3.00  | 1.65 | 4.85 |
|  | ▲ | P04278 | Sex hormone-binding globulin OS=Homo sapiens GN=SHBG PE=1 SV=2 - [SHBG_HUMAN]                         | 8.00  | 8.00  | 1.17 | 4.84 |
|  | ▲ | P56277 | Protein p8 MTCP-1 OS=Homo sapiens GN=MTCP1 PE=1 SV=1 - [MTCPA_HUMAN]                                  | 1.00  | 1.00  | 1.25 | 4.83 |
|  | ▲ | P12882 | Myosin-1 OS=Homo sapiens GN=MYH1 PE=1 SV=3 - [MYH1_HUMAN]                                             | 2.00  | 9.00  | 1.89 | 4.78 |
|  | ▲ | P08697 | Alpha-2-antiplasmin OS=Homo sapiens GN=SERPINF2 PE=1 SV=3 - [A2AP_HUMAN]                              | 17.00 | 17.00 | 1.98 | 4.73 |
|  | ▲ | P62942 | Peptidyl-prolyl cis-trans isomerase FKBP1A OS=Homo sapiens GN=FKBP1A PE=1 SV=2 - [FKB1A_HUMAN]        | 3.00  | 3.00  | 1.38 | 4.67 |
|  | ▲ | Q15084 | Protein disulfide-isomerase A6 OS=Homo sapiens GN=PDIA6 PE=1 SV=1 - [PDIA6_HUMAN]                     | 2.00  | 2.00  | 1.42 | 4.66 |
|  | ▲ | P02741 | C-reactive protein OS=Homo sapiens GN=CRP PE=1 SV=1 - [CRP_HUMAN]                                     | 7.00  | 7.00  | 1.52 | 4.64 |
|  | ▲ | P08603 | Complement factor H OS=Homo sapiens GN=CFH PE=1 SV=4 - [CFAH_HUMAN]                                   | 21.00 | 23.00 | 2.00 | 4.63 |
|  | ▲ | P19823 | Inter-alpha-trypsin inhibitor heavy chain H2 OS=Homo sapiens GN=ITIH2 PE=1 SV=2 - [ITIH2_HUMAN]       | 19.00 | 19.00 | 1.91 | 4.62 |
|  | ▲ | P17661 | Desmin OS=Homo sapiens GN=DES PE=1 SV=3 - [DESM_HUMAN]                                                | 2.00  | 4.00  | 1.38 | 4.61 |
|  | ▲ | P41271 | Neuroblastoma suppressor of tumorigenicity 1 OS=Homo sapiens GN=NBL1 PE=1 SV=1 - [NBL1_HUMAN]         | 2.00  | 2.00  | 1.55 | 4.58 |
|  | ▲ | Q13907 | Isopentenyl-diphosphate Delta-isomerase 1 OS=Homo sapiens GN=IDI1 PE=1 SV=2 - [IDI1_HUMAN]            | 1.00  | 1.00  | 1.52 | 4.58 |
|  | ▲ | Q9Y2B0 | Protein canopy homolog 2 OS=Homo sapiens GN=CNPY2 PE=1 SV=1 - [CNPY2_HUMAN]                           | 1.00  | 1.00  | 1.69 | 4.55 |
|  | ▲ | Q9H6Z4 | Ran-binding protein 3 OS=Homo sapiens GN=RANBP3 PE=1 SV=1 - [RANB3_HUMAN]                             | 1.00  | 1.00  | 1.94 | 4.55 |

|  |   |        |                                                                                                     |       |       |      |      |
|--|---|--------|-----------------------------------------------------------------------------------------------------|-------|-------|------|------|
|  | ▲ | Q9UJC5 | SH3 domain-binding glutamic acid-rich-like protein 2 OS=Homo sapiens GN=SH3BGRL2 PE=1 SV=2 - [SH3L  | 1.00  | 1.00  | 1.46 | 4.55 |
|  | ▲ | P03952 | Plasma kallikrein OS=Homo sapiens GN=KLKB1 PE=1 SV=1 - [KLKB1_HUMAN]                                | 10.00 | 10.00 | 1.96 | 4.55 |
|  | ▲ | Q969H8 | UPF0556 protein C19orf10 OS=Homo sapiens GN=C19orf10 PE=1 SV=1 - [CS010_HUMAN]                      | 6.00  | 6.00  | 1.90 | 4.53 |
|  | ▲ | P35318 | ADM OS=Homo sapiens GN=ADM PE=1 SV=1 - [ADML_HUMAN]                                                 | 2.00  | 2.00  | 1.38 | 4.45 |
|  | ▲ | P82979 | SAP domain-containing ribonucleoprotein OS=Homo sapiens GN=SARNP PE=1 SV=3 - [SARNP_HUMAN]          | 1.00  | 1.00  | 1.70 | 4.43 |
|  | ▲ | Q5SSJ5 | Heterochromatin protein 1-binding protein 3 OS=Homo sapiens GN=HP1BP3 PE=1 SV=1 - [HP1B3_HUMAN]     | 1.00  | 1.00  | 0.70 | 4.41 |
|  | ▲ | P27797 | Calreticulin OS=Homo sapiens GN=CALR PE=1 SV=1 - [CALR_HUMAN]                                       | 15.00 | 15.00 | 1.54 | 4.37 |
|  | ▲ | Q07065 | Cytoskeleton-associated protein 4 OS=Homo sapiens GN=CKAP4 PE=1 SV=2 - [CKAP4_HUMAN]                | 1.00  | 1.00  | 0.96 | 4.34 |
|  | ▲ | Q17RC7 | SEC6-like protein C14orf73 OS=Homo sapiens GN=C14orf73 PE=2 SV=2 - [CN073_HUMAN]                    | 1.00  | 1.00  | 1.10 | 4.31 |
|  | ▲ | Q9H3N1 | Thioredoxin-related transmembrane protein 1 OS=Homo sapiens GN=TMX1 PE=1 SV=1 - [TMX1_HUMAN]        | 1.00  | 1.00  | 1.07 | 4.31 |
|  | ▲ | Q9BUD6 | Spondin-2 OS=Homo sapiens GN=SPON2 PE=1 SV=2 - [SPON2_HUMAN]                                        | 4.00  | 4.00  | 1.52 | 4.30 |
|  | ▲ | Q13444 | Disintegrin and metalloproteinase domain-containing protein 15 OS=Homo sapiens GN=ADAM15 PE=1 SV=3  | 2.00  | 2.00  | 1.01 | 4.28 |
|  | ▲ | P80511 | Protein S100-A12 OS=Homo sapiens GN=S100A12 PE=1 SV=2 - [S10AC_HUMAN]                               | 3.00  | 3.00  | 1.86 | 4.27 |
|  | ▲ | Q96A32 | Myosin regulatory light chain 2, skeletal muscle isoform OS=Homo sapiens GN=MYLPF PE=2 SV=1 - [MLRS | 1.00  | 1.00  | 1.38 | 4.26 |
|  | ▲ | Q9UMX5 | Neudesin OS=Homo sapiens GN=NENF PE=1 SV=1 - [NENF_HUMAN]                                           | 7.00  | 7.00  | 1.70 | 4.17 |
|  | ▲ | Q9Y5Z4 | Heme-binding protein 2 OS=Homo sapiens GN=HEBP2 PE=1 SV=1 - [HEBP2_HUMAN]                           | 6.00  | 6.00  | 1.48 | 4.17 |
|  | ▲ | P00747 | Plasminogen OS=Homo sapiens GN=PLG PE=1 SV=2 - [PLMN_HUMAN]                                         | 35.00 | 35.00 | 1.94 | 4.14 |
|  | ▲ | P01814 | Ig heavy chain V-II region OU OS=Homo sapiens PE=1 SV=1 - [HV201_HUMAN]                             | 1.00  | 1.00  | 1.90 | 4.14 |
|  | ▲ | Q96Q06 | Perilipin-4 OS=Homo sapiens GN=PLIN4 PE=2 SV=2 - [PLIN4_HUMAN]                                      | 2.00  | 2.00  | 1.78 | 4.12 |
|  | ▲ | Q12983 | BCL2/adenovirus E1B 19 kDa protein-interacting protein 3 OS=Homo sapiens GN=BNIP3 PE=1 SV=2 - [BNIP | 1.00  | 1.00  | 1.32 | 4.10 |
|  | ▲ | Q9BRA2 | Thioredoxin domain-containing protein 17 OS=Homo sapiens GN=TXNDC17 PE=1 SV=1 - [TXD17_HUMAN]       | 2.00  | 2.00  | 1.38 | 4.05 |
|  | ▲ | Q05682 | Caldesmon OS=Homo sapiens GN=CALD1 PE=1 SV=2 - [CALD1_HUMAN]                                        | 5.00  | 5.00  | 1.32 | 4.03 |
|  | ▲ | O60240 | Perilipin-1 OS=Homo sapiens GN=PLIN1 PE=2 SV=2 - [PLIN1_HUMAN]                                      | 2.00  | 2.00  | 0.91 | 3.98 |
|  | ▲ | P23588 | Eukaryotic translation initiation factor 4B OS=Homo sapiens GN=EIF4B PE=1 SV=2 - [IF4B_HUMAN]       | 2.00  | 2.00  | 1.24 | 3.95 |
|  | ▲ | P05109 | Protein S100-A8 OS=Homo sapiens GN=S100A8 PE=1 SV=1 - [S10A8_HUMAN]                                 | 9.00  | 9.00  | 1.93 | 3.92 |
|  | ▲ | P06732 | Creatine kinase M-type OS=Homo sapiens GN=CKM PE=1 SV=2 - [KCRM_HUMAN]                              | 2.00  | 2.00  | 1.23 | 3.90 |
|  | ▲ | P13497 | Bone morphogenetic protein 1 OS=Homo sapiens GN=BMP1 PE=1 SV=2 - [BMP1_HUMAN]                       | 2.00  | 2.00  | 1.44 | 3.90 |
|  | ▲ | Q9BXX0 | EMILIN-2 OS=Homo sapiens GN=EMILIN2 PE=1 SV=3 - [EMIL2_HUMAN]                                       | 5.00  | 5.00  | 1.89 | 3.89 |
|  | ▲ | Q8WWX9 | Selenoprotein M OS=Homo sapiens GN=SELM PE=1 SV=3 - [SELM_HUMAN]                                    | 2.00  | 2.00  | 1.42 | 3.88 |
|  | ▲ | Q9UBE0 | SUMO-activating enzyme subunit 1 OS=Homo sapiens GN=SAE1 PE=1 SV=1 - [SAE1_HUMAN]                   | 1.00  | 1.00  | 1.29 | 3.87 |
|  | ▲ | Q8NHH1 | Tubulin polyglutamylase TTL11 OS=Homo sapiens GN=TTL11 PE=2 SV=1 - [TTL11_HUMAN]                    | 1.00  | 1.00  | 1.05 | 3.86 |
|  | ▲ | O14561 | Acyl carrier protein, mitochondrial OS=Homo sapiens GN=NDUFAB1 PE=1 SV=3 - [ACPM_HUMAN]             | 2.00  | 2.00  | 1.28 | 3.86 |
|  | ▲ | Q8NI22 | Multiple coagulation factor deficiency protein 2 OS=Homo sapiens GN=MCFD2 PE=1 SV=1 - [MCFD2_HUM    | 1.00  | 1.00  | 1.67 | 3.84 |
|  | ▲ | Q96FJ2 | Dynein light chain 2, cytoplasmic OS=Homo sapiens GN=DYNLL2 PE=1 SV=1 - [DYL2_HUMAN]                | 2.00  | 3.00  | 0.95 | 3.80 |
|  | ▲ | P01857 | Ig gamma-1 chain C region OS=Homo sapiens GN=IGHG1 PE=1 SV=1 - [IGHG1_HUMAN]                        | 10.00 | 21.00 | 1.69 | 3.78 |
|  | ▲ | Q14061 | Cytochrome c oxidase copper chaperone OS=Homo sapiens GN=COX17 PE=1 SV=2 - [COX17_HUMAN]            | 2.00  | 2.00  | 1.74 | 3.77 |

|  |   |        |                                                                                                               |       |       |      |      |
|--|---|--------|---------------------------------------------------------------------------------------------------------------|-------|-------|------|------|
|  | ▲ | Q86SX6 | Glutaredoxin-related protein 5, mitochondrial OS=Homo sapiens GN=GLRX5 PE=1 SV=2 - [GLRX5_HUMAN]              | 1.00  | 1.00  | 1.80 | 3.77 |
|  | ▲ | P84243 | Histone H3.3 OS=Homo sapiens GN=H3F3A PE=1 SV=2 - [H33_HUMAN]                                                 | 1.00  | 1.00  | 1.26 | 3.74 |
|  | ▲ | O00244 | Copper transport protein ATOX1 OS=Homo sapiens GN=ATOX1 PE=1 SV=1 - [ATOX1_HUMAN]                             | 3.00  | 3.00  | 1.24 | 3.74 |
|  | ▲ | P01861 | Ig gamma-4 chain C region OS=Homo sapiens GN=IGHG4 PE=1 SV=1 - [IGHG4_HUMAN]                                  | 7.00  | 14.00 | 1.16 | 3.71 |
|  | ▲ | P02671 | Fibrinogen alpha chain OS=Homo sapiens GN=FGA PE=1 SV=2 - [FIBA_HUMAN]                                        | 33.00 | 33.00 | 1.79 | 3.66 |
|  | ▲ | Q13451 | Peptidyl-prolyl cis-trans isomerase FKBP5 OS=Homo sapiens GN=FKBP5 PE=1 SV=2 - [FKBP5_HUMAN]                  | 3.00  | 3.00  | 1.69 | 3.63 |
|  | ▲ | P07451 | Carbonic anhydrase 3 OS=Homo sapiens GN=CA3 PE=1 SV=3 - [CAH3_HUMAN]                                          | 6.00  | 6.00  | 1.98 | 3.63 |
|  | ▲ | Q969T9 | WW domain-binding protein 2 OS=Homo sapiens GN=WBP2 PE=1 SV=1 - [WBP2_HUMAN]                                  | 2.00  | 2.00  | 1.68 | 3.63 |
|  | ▲ | P00742 | Coagulation factor X OS=Homo sapiens GN=F10 PE=1 SV=2 - [FA10_HUMAN]                                          | 3.00  | 3.00  | 1.31 | 3.62 |
|  | ▲ | P08590 | Myosin light chain 3 OS=Homo sapiens GN=MYL3 PE=1 SV=3 - [MYL3_HUMAN]                                         | 4.00  | 4.00  | 1.70 | 3.61 |
|  | ▲ | P52758 | Ribonuclease UK114 OS=Homo sapiens GN=HRSP12 PE=1 SV=1 - [UK114_HUMAN]                                        | 6.00  | 6.00  | 1.14 | 3.58 |
|  | ▲ | P30048 | Thioredoxin-dependent peroxide reductase, mitochondrial OS=Homo sapiens GN=PRDX3 PE=1 SV=3 - [PRDX3_HUMAN]    | 3.00  | 3.00  | 1.36 | 3.55 |
|  | ▲ | P09012 | U1 small nuclear ribonucleoprotein A OS=Homo sapiens GN=SNRPA PE=1 SV=3 - [SNRPA_HUMAN]                       | 1.00  | 1.00  | 1.43 | 3.54 |
|  | ▲ | A6NKN8 | Purkinje cell protein 4-like protein 1 OS=Homo sapiens GN=PCP4L1 PE=2 SV=3 - [PC4L1_HUMAN]                    | 1.00  | 1.00  | 1.74 | 3.54 |
|  | ▲ | P01763 | Ig heavy chain V-III region WEA OS=Homo sapiens PE=1 SV=1 - [HV302_HUMAN]                                     | 1.00  | 2.00  | 1.52 | 3.53 |
|  | ▲ | Q6UWP8 | Suprabasin OS=Homo sapiens GN=SBSN PE=2 SV=1 - [SBSN_HUMAN]                                                   | 4.00  | 4.00  | 1.34 | 3.46 |
|  | ▲ | P02766 | Transthyretin OS=Homo sapiens GN=TTR PE=1 SV=1 - [TTHY_HUMAN]                                                 | 10.00 | 10.00 | 1.49 | 3.46 |
|  | ▲ | P01037 | Cystatin-SN OS=Homo sapiens GN=CST1 PE=1 SV=2 - [CYTN_HUMAN]                                                  | 3.00  | 5.00  | 1.29 | 3.46 |
|  | ▲ | P13671 | Complement component C6 OS=Homo sapiens GN=C6 PE=1 SV=3 - [CO6_HUMAN]                                         | 16.00 | 16.00 | 1.97 | 3.45 |
|  | ▲ | Q99969 | Retinoic acid receptor responder protein 2 OS=Homo sapiens GN=RARRES2 PE=1 SV=1 - [RARR2_HUMAN]               | 4.00  | 4.00  | 0.76 | 3.45 |
|  | ▲ | Q8WW12 | PEST proteolytic signal-containing nuclear protein OS=Homo sapiens GN=PCNP PE=1 SV=2 - [PCNP_HUMAN]           | 1.00  | 1.00  | 1.49 | 3.43 |
|  | ▲ | P01019 | Angiotensinogen OS=Homo sapiens GN=AGT PE=1 SV=1 - [ANGT_HUMAN]                                               | 14.00 | 14.00 | 1.92 | 3.40 |
|  | ▲ | P63208 | S-phase kinase-associated protein 1 OS=Homo sapiens GN=SKP1 PE=1 SV=2 - [SKP1_HUMAN]                          | 11.00 | 11.00 | 1.38 | 3.39 |
|  | ▲ | Q9UKK9 | ADP-sugar pyrophosphatase OS=Homo sapiens GN=NUDT5 PE=1 SV=1 - [NUDT5_HUMAN]                                  | 4.00  | 4.00  | 1.61 | 3.37 |
|  | ▲ | Q15149 | Plectin-1 OS=Homo sapiens GN=PLEC1 PE=1 SV=3 - [PLEC1_HUMAN]                                                  | 3.00  | 3.00  | 1.93 | 3.33 |
|  | ▲ | P09493 | Tropomyosin alpha-1 chain OS=Homo sapiens GN=TPM1 PE=1 SV=2 - [TPM1_HUMAN]                                    | 1.00  | 4.00  | 1.53 | 3.31 |
|  | ▲ | P02747 | Complement C1q subcomponent subunit C OS=Homo sapiens GN=C1QC PE=1 SV=3 - [C1QC_HUMAN]                        | 1.00  | 1.00  | 1.74 | 3.30 |
|  | ▲ | P01031 | Complement C5 OS=Homo sapiens GN=C5 PE=1 SV=4 - [CO5_HUMAN]                                                   | 21.00 | 21.00 | 1.74 | 3.30 |
|  | ▲ | P50552 | Vasodilator-stimulated phosphoprotein OS=Homo sapiens GN=VASP PE=1 SV=3 - [VASP_HUMAN]                        | 3.00  | 3.00  | 1.39 | 3.29 |
|  | ▲ | P22061 | Protein-L-isoaspartate(D-aspartate) O-methyltransferase OS=Homo sapiens GN=PCMT1 PE=1 SV=3 - [PIMT_HUMAN]     | 4.00  | 4.00  | 1.29 | 3.27 |
|  | ▲ | Q9NS69 | Mitochondrial import receptor subunit TOM22 homolog OS=Homo sapiens GN=TOMM22 PE=1 SV=3 - [TOMM22_HUMAN]      | 1.00  | 1.00  | 1.46 | 3.25 |
|  | ▲ | P01771 | Ig heavy chain V-III region HIL OS=Homo sapiens PE=1 SV=1 - [HV310_HUMAN]                                     | 2.00  | 2.00  | 1.72 | 3.25 |
|  | ▲ | P35749 | Myosin-11 OS=Homo sapiens GN=MYH11 PE=1 SV=3 - [MYH11_HUMAN]                                                  | 5.00  | 6.00  | 1.59 | 3.23 |
|  | ▲ | Q92496 | Complement factor H-related protein 4 OS=Homo sapiens GN=CFHR4 PE=1 SV=2 - [FHR4_HUMAN]                       | 4.00  | 4.00  | 1.84 | 3.23 |
|  | ▲ | Q02223 | Tumor necrosis factor receptor superfamily member 17 OS=Homo sapiens GN=TNFRSF17 PE=1 SV=1 - [TNFRSF17_HUMAN] | 1.00  | 1.00  | 0.89 | 3.23 |
|  | ▲ | P08709 | Coagulation factor VII OS=Homo sapiens GN=F7 PE=1 SV=1 - [FA7_HUMAN]                                          | 5.00  | 5.00  | 1.74 | 3.22 |

|  |   |        |                                                                                                                    |       |       |      |      |
|--|---|--------|--------------------------------------------------------------------------------------------------------------------|-------|-------|------|------|
|  | ▲ | Q96S96 | Phosphatidylethanolamine-binding protein 4 OS=Homo sapiens GN=PEBP4 PE=1 SV=3 - [PEBP4_HUMAN]                      | 7.00  | 7.00  | 1.18 | 3.21 |
|  | ▲ | Q86X29 | Lipolysis-stimulated lipoprotein receptor OS=Homo sapiens GN=LSR PE=1 SV=4 - [LSR_HUMAN]                           | 6.00  | 6.00  | 1.33 | 3.20 |
|  | ▲ | P82930 | 28S ribosomal protein S34, mitochondrial OS=Homo sapiens GN=MRPS34 PE=1 SV=2 - [RT34_HUMAN]                        | 1.00  | 1.00  | 1.39 | 3.20 |
|  | ▲ | P23396 | 40S ribosomal protein S3 OS=Homo sapiens GN=RPS3 PE=1 SV=2 - [RS3_HUMAN]                                           | 1.00  | 1.00  | 0.89 | 3.19 |
|  | ▲ | Q9UN36 | Protein NDRG2 OS=Homo sapiens GN=NDRG2 PE=1 SV=2 - [NDRG2_HUMAN]                                                   | 2.00  | 2.00  | 1.17 | 3.18 |
|  | ▲ | P11171 | Protein 4.1 OS=Homo sapiens GN=EPB41 PE=1 SV=4 - [41_HUMAN]                                                        | 1.00  | 1.00  | 0.85 | 3.18 |
|  | ▲ | Q13508 | Ecto-ADP-ribosyltransferase 3 OS=Homo sapiens GN=ART3 PE=1 SV=2 - [NAR3_HUMAN]                                     | 11.00 | 11.00 | 1.85 | 3.18 |
|  | ▲ | P01815 | Ig heavy chain V-II region COR OS=Homo sapiens PE=1 SV=1 - [HV202_HUMAN]                                           | 1.00  | 1.00  | 1.84 | 3.17 |
|  | ▲ | O95084 | Serine protease 23 OS=Homo sapiens GN=PRSS23 PE=1 SV=1 - [PRS23_HUMAN]                                             | 2.00  | 2.00  | 1.19 | 3.15 |
|  | ▲ | Q92688 | Acidic leucine-rich nuclear phosphoprotein 32 family member B OS=Homo sapiens GN=ANP32B PE=1 SV=1 - [ANP32B_HUMAN] | 1.00  | 1.00  | 1.16 | 3.13 |
|  | ▲ | Q641Q3 | Meteorin-like protein OS=Homo sapiens GN=METRNL PE=2 SV=1 - [METRL_HUMAN]                                          | 1.00  | 1.00  | 1.09 | 3.10 |
|  | ▲ | Q86UE4 | Protein LYRIC OS=Homo sapiens GN=MTDH PE=1 SV=2 - [LYRIC_HUMAN]                                                    | 2.00  | 2.00  | 0.85 | 3.09 |
|  | ▲ | Q96HC4 | PDZ and LIM domain protein 5 OS=Homo sapiens GN=PDLIM5 PE=1 SV=4 - [PDLI5_HUMAN]                                   | 2.00  | 2.00  | 1.24 | 3.08 |
|  | ▲ | P37802 | Transgelin-2 OS=Homo sapiens GN=TAGLN2 PE=1 SV=3 - [TAGL2_HUMAN]                                                   | 8.00  | 8.00  | 0.73 | 3.08 |
|  | ▲ | P81605 | Dermcidin OS=Homo sapiens GN=DCD PE=1 SV=2 - [DCD_HUMAN]                                                           | 7.00  | 7.00  | 1.32 | 3.07 |
|  | ▲ | Q96L50 | Peptidylprolyl isomerase-like 5 OS=Homo sapiens GN=PPIL5 PE=1 SV=2 - [LLR1_HUMAN]                                  | 1.00  | 1.00  | 1.42 | 3.07 |
|  | ▲ | P49908 | Selenoprotein P OS=Homo sapiens GN=SEPP1 PE=1 SV=3 - [SEPP1_HUMAN]                                                 | 5.00  | 5.00  | 1.68 | 3.05 |
|  | ▲ | Q01524 | Defensin-6 OS=Homo sapiens GN=DEFA6 PE=1 SV=1 - [DEF6_HUMAN]                                                       | 2.00  | 2.00  | 1.88 | 3.04 |
|  | ▲ | Q9P2E9 | Ribosome-binding protein 1 OS=Homo sapiens GN=RRBP1 PE=1 SV=4 - [RRBP1_HUMAN]                                      | 6.00  | 6.00  | 1.43 | 3.04 |
|  | ▲ | P42167 | Lamina-associated polypeptide 2, isoforms beta/gamma OS=Homo sapiens GN=TMPO PE=1 SV=2 - [LAP2B_HUMAN]             | 1.00  | 1.00  | 1.11 | 3.04 |
|  | ▲ | Q86TD4 | Sarcalumenin OS=Homo sapiens GN=SRL PE=2 SV=2 - [SRCA_HUMAN]                                                       | 2.00  | 2.00  | 1.48 | 3.04 |
|  | ▲ | P78539 | Sushi repeat-containing protein SRPX OS=Homo sapiens GN=SRPX PE=2 SV=1 - [SRPX_HUMAN]                              | 1.00  | 1.00  | 1.58 | 3.02 |
|  | ▲ | Q92932 | Receptor-type tyrosine-protein phosphatase N2 OS=Homo sapiens GN=PTPRN2 PE=1 SV=2 - [PTPR2_HUMAN]                  | 3.00  | 3.00  | 1.67 | 3.01 |
|  | ▲ | Q99972 | Myocilin OS=Homo sapiens GN=MYOC PE=1 SV=2 - [MYOC_HUMAN]                                                          | 11.00 | 11.00 | 1.50 | 3.00 |
|  | ▲ | Q8NHM4 | Putative trypsin-6 OS=Homo sapiens GN=TRY6 PE=5 SV=1 - [TRY6_HUMAN]                                                | 1.00  | 3.00  | 1.40 | 3.00 |
|  | ▲ | P07237 | Protein disulfide-isomerase OS=Homo sapiens GN=P4HB PE=1 SV=3 - [PDIA1_HUMAN]                                      | 11.00 | 11.00 | 1.52 | 2.98 |
|  | ▲ | Q9H8Y8 | Golgi reassembly-stacking protein 2 OS=Homo sapiens GN=GORASP2 PE=1 SV=3 - [GORS2_HUMAN]                           | 1.00  | 1.00  | 1.71 | 2.98 |
|  | ▲ | Q8N8N7 | Prostaglandin reductase 2 OS=Homo sapiens GN=PTGR2 PE=1 SV=1 - [PTGR2_HUMAN]                                       | 7.00  | 7.00  | 1.27 | 2.96 |
|  | ▲ | P56159 | GDNF family receptor alpha-1 OS=Homo sapiens GN=GFRA1 PE=2 SV=2 - [GFRA1_HUMAN]                                    | 1.00  | 1.00  | 1.45 | 2.96 |
|  | ▲ | P00451 | Coagulation factor VIII OS=Homo sapiens GN=F8 PE=1 SV=1 - [FA8_HUMAN]                                              | 1.00  | 1.00  | 1.59 | 2.96 |
|  | ▲ | Q13361 | Microfibrillar-associated protein 5 OS=Homo sapiens GN=MFAP5 PE=1 SV=1 - [MFAP5_HUMAN]                             | 3.00  | 3.00  | 1.89 | 2.94 |
|  | ▲ | P30508 | HLA class I histocompatibility antigen, Cw-12 alpha chain OS=Homo sapiens GN=HLA-C PE=1 SV=2 - [1C12_HUMAN]        | 3.00  | 5.00  | 1.31 | 2.94 |
|  | ▲ | P24666 | Low molecular weight phosphotyrosine protein phosphatase OS=Homo sapiens GN=ACP1 PE=1 SV=3 - [PPAC1_HUMAN]         | 2.00  | 2.00  | 0.80 | 2.93 |
|  | ▲ | Q9UBY9 | Heat shock protein beta-7 OS=Homo sapiens GN=HSPB7 PE=1 SV=1 - [HSPB7_HUMAN]                                       | 1.00  | 1.00  | 1.75 | 2.92 |
|  | ▲ | P01343 | Insulin-like growth factor IA OS=Homo sapiens GN=IGF1 PE=1 SV=1 - [IGF1A_HUMAN]                                    | 2.00  | 2.00  | 1.46 | 2.91 |
|  | ▲ | P09486 | SPARC OS=Homo sapiens GN=SPARC PE=1 SV=1 - [SPRC_HUMAN]                                                            | 1.00  | 1.00  | 1.82 | 2.91 |

|  |   |        |                                                                                                                       |       |       |      |      |
|--|---|--------|-----------------------------------------------------------------------------------------------------------------------|-------|-------|------|------|
|  | ▲ | Q71DI3 | Histone H3.2 OS=Homo sapiens GN=HIST2H3A PE=1 SV=3 - [H32_HUMAN]                                                      | 1.00  | 1.00  | 1.37 | 2.91 |
|  | ▲ | Q09666 | Neuroblast differentiation-associated protein AHNAK OS=Homo sapiens GN=AHNAK PE=1 SV=2 - [AHNAK_HUMAN]                | 61.00 | 61.00 | 1.45 | 2.90 |
|  | ▲ | O60506 | Heterogeneous nuclear ribonucleoprotein Q OS=Homo sapiens GN=SYNCRIP PE=1 SV=2 - [HNRQP_HUMAN]                        | 1.00  | 1.00  | 1.08 | 2.90 |
|  | ▲ | P61978 | Heterogeneous nuclear ribonucleoprotein K OS=Homo sapiens GN=HNRNPK PE=1 SV=1 - [HNRPK_HUMAN]                         | 1.00  | 1.00  | 0.90 | 2.90 |
|  | ▲ | Q96C90 | Protein phosphatase 1 regulatory subunit 14B OS=Homo sapiens GN=PPP1R14B PE=1 SV=3 - [PP14B_HUMAN]                    | 1.00  | 1.00  | 1.50 | 2.89 |
|  | ▲ | P00167 | Cytochrome b5 OS=Homo sapiens GN=CYB5A PE=1 SV=2 - [CYB5_HUMAN]                                                       | 2.00  | 2.00  | 1.76 | 2.89 |
|  | ▲ | P20908 | Collagen alpha-1(V) chain OS=Homo sapiens GN=COL5A1 PE=1 SV=3 - [CO5A1_HUMAN]                                         | 2.00  | 2.00  | 1.55 | 2.87 |
|  | ▲ | Q9UKY7 | Protein CDV3 homolog OS=Homo sapiens GN=CDV3 PE=1 SV=1 - [CDV3_HUMAN]                                                 | 3.00  | 3.00  | 1.26 | 2.85 |
|  | ▲ | P50281 | Matrix metalloproteinase-14 OS=Homo sapiens GN=MMP14 PE=1 SV=2 - [MMP14_HUMAN]                                        | 1.00  | 1.00  | 1.23 | 2.84 |
|  | ▲ | P37840 | Alpha-synuclein OS=Homo sapiens GN=SNCA PE=1 SV=1 - [SYUA_HUMAN]                                                      | 4.00  | 4.00  | 1.93 | 2.83 |
|  | ▲ | O75781 | Paralemmin OS=Homo sapiens GN=PALM PE=1 SV=2 - [PALM_HUMAN]                                                           | 3.00  | 3.00  | 1.23 | 2.83 |
|  | ▲ | Q07812 | Apoptosis regulator BAX OS=Homo sapiens GN=BAX PE=1 SV=1 - [BAX_HUMAN]                                                | 4.00  | 4.00  | 1.74 | 2.83 |
|  | ▲ | Q92575 | UBX domain-containing protein 4 OS=Homo sapiens GN=UBXN4 PE=1 SV=2 - [UBXN4_HUMAN]                                    | 1.00  | 1.00  | 1.58 | 2.82 |
|  | ▲ | Q9NRR1 | Cytokine-like protein 1 OS=Homo sapiens GN=CYTL1 PE=1 SV=1 - [CYTL1_HUMAN]                                            | 2.00  | 2.00  | 1.29 | 2.81 |
|  | ▲ | P35754 | Glutaredoxin-1 OS=Homo sapiens GN=GLRX PE=1 SV=2 - [GLRX1_HUMAN]                                                      | 5.00  | 5.00  | 1.43 | 2.81 |
|  | ▲ | P35579 | Myosin-9 OS=Homo sapiens GN=MYH9 PE=1 SV=4 - [MYH9_HUMAN]                                                             | 13.00 | 14.00 | 1.46 | 2.81 |
|  | ▲ | P01008 | Antithrombin-III OS=Homo sapiens GN=SERPINC1 PE=1 SV=1 - [ANT3_HUMAN]                                                 | 27.00 | 27.00 | 1.86 | 2.80 |
|  | ▲ | Q99497 | Protein DJ-1 OS=Homo sapiens GN=PARK7 PE=1 SV=2 - [PARK7_HUMAN]                                                       | 11.00 | 11.00 | 0.89 | 2.79 |
|  | ▲ | P02749 | Beta-2-glycoprotein 1 OS=Homo sapiens GN=APOH PE=1 SV=3 - [APOH_HUMAN]                                                | 17.00 | 17.00 | 1.39 | 2.78 |
|  | ▲ | P33241 | Lymphocyte-specific protein 1 OS=Homo sapiens GN=LSP1 PE=1 SV=1 - [LSP1_HUMAN]                                        | 3.00  | 3.00  | 1.29 | 2.78 |
|  | ▲ | O00763 | Acetyl-CoA carboxylase 2 OS=Homo sapiens GN=ACACB PE=1 SV=2 - [ACACB_HUMAN]                                           | 1.00  | 1.00  | 0.80 | 2.76 |
|  | ▲ | Q9HD89 | Resistin OS=Homo sapiens GN=RETN PE=2 SV=1 - [RETN_HUMAN]                                                             | 5.00  | 5.00  | 1.26 | 2.75 |
|  | ▲ | P55058 | Phospholipid transfer protein OS=Homo sapiens GN=PLTP PE=1 SV=1 - [PLTP_HUMAN]                                        | 4.00  | 4.00  | 1.45 | 2.74 |
|  | ▲ | O14817 | Tetraspanin-4 OS=Homo sapiens GN=TSPAN4 PE=1 SV=1 - [TSN4_HUMAN]                                                      | 1.00  | 1.00  | 1.44 | 2.73 |
|  | ▲ | O00479 | High mobility group nucleosome-binding domain-containing protein 4 OS=Homo sapiens GN=HMGN4 PE=1 SV=1 - [HMGN4_HUMAN] | 1.00  | 1.00  | 1.31 | 2.72 |
|  | ▲ | P01743 | Ig heavy chain V-I region HG3 OS=Homo sapiens PE=4 SV=1 - [HV102_HUMAN]                                               | 2.00  | 3.00  | 1.76 | 2.72 |
|  | ▲ | O60664 | Perilipin-3 OS=Homo sapiens GN=PLIN3 PE=1 SV=2 - [PLIN3_HUMAN]                                                        | 7.00  | 7.00  | 1.21 | 2.70 |
|  | ▲ | P47897 | GlutaminyI-tRNA synthetase OS=Homo sapiens GN=QARS PE=1 SV=1 - [SYQ_HUMAN]                                            | 1.00  | 1.00  | 1.35 | 2.70 |
|  | ▲ | O60814 | Histone H2B type 1-K OS=Homo sapiens GN=HIST1H2BK PE=1 SV=3 - [H2B1K_HUMAN]                                           | 2.00  | 2.00  | 1.69 | 2.69 |
|  | ▲ | P01859 | Ig gamma-2 chain C region OS=Homo sapiens GN=IGHG2 PE=1 SV=2 - [IGHG2_HUMAN]                                          | 8.00  | 16.00 | 2.00 | 2.66 |
|  | ▲ | O43237 | Cytoplasmic dynein 1 light intermediate chain 2 OS=Homo sapiens GN=DYNC1LI2 PE=1 SV=1 - [DC1L2_HUMAN]                 | 1.00  | 1.00  | 1.90 | 2.66 |
|  | ▲ | P78563 | Double-stranded RNA-specific editase 1 OS=Homo sapiens GN=ADARB1 PE=1 SV=1 - [RED1_HUMAN]                             | 1.00  | 1.00  | 1.18 | 2.65 |
|  | ▲ | Q9UDY2 | Tight junction protein ZO-2 OS=Homo sapiens GN=TJP2 PE=1 SV=1 - [ZO2_HUMAN]                                           | 1.00  | 1.00  | 1.02 | 2.63 |
|  | ▲ | Q9Y4L1 | Hypoxia up-regulated protein 1 OS=Homo sapiens GN=HYOU1 PE=1 SV=1 - [HYOU1_HUMAN]                                     | 9.00  | 9.00  | 1.51 | 2.63 |
|  | ▲ | Q9Y5C1 | Angiopoietin-related protein 3 OS=Homo sapiens GN=ANGPTL3 PE=1 SV=1 - [ANGL3_HUMAN]                                   | 4.00  | 4.00  | 1.65 | 2.63 |
|  | ▲ | P04070 | Vitamin K-dependent protein C OS=Homo sapiens GN=PROC PE=1 SV=1 - [PROC_HUMAN]                                        | 2.00  | 2.00  | 0.93 | 2.61 |

|  |   |        |                                                                                                       |       |       |      |      |
|--|---|--------|-------------------------------------------------------------------------------------------------------|-------|-------|------|------|
|  | ▲ | Q15738 | Sterol-4-alpha-carboxylate 3-dehydrogenase, decarboxylating OS=Homo sapiens GN=NSDHL PE=1 SV=2 - [N   | 1.00  | 1.00  | 1.58 | 2.60 |
|  | ▲ | P49257 | Protein ERGIC-53 OS=Homo sapiens GN=LMAN1 PE=1 SV=2 - [LMAN1_HUMAN]                                   | 2.00  | 2.00  | 1.38 | 2.59 |
|  | ▲ | Q9BSH5 | Haloacid dehalogenase-like hydrolase domain-containing protein 3 OS=Homo sapiens GN=HDHD3 PE=1 SV=    | 1.00  | 1.00  | 1.41 | 2.59 |
|  | ▲ | Q16891 | Mitochondrial inner membrane protein OS=Homo sapiens GN=IMMT PE=1 SV=1 - [IMMT_HUMAN]                 | 2.00  | 2.00  | 0.95 | 2.55 |
|  | ▲ | Q86YT9 | Junctional adhesion molecule-like OS=Homo sapiens GN=AMICA1 PE=1 SV=1 - [JAML1_HUMAN]                 | 1.00  | 1.00  | 1.59 | 2.55 |
|  | ▲ | P18065 | Insulin-like growth factor-binding protein 2 OS=Homo sapiens GN=IGFBP2 PE=1 SV=2 - [IBP2_HUMAN]       | 10.00 | 10.00 | 1.21 | 2.55 |
|  | ▲ | P00748 | Coagulation factor XII OS=Homo sapiens GN=F12 PE=1 SV=2 - [FA12_HUMAN]                                | 6.00  | 6.00  | 1.18 | 2.55 |
|  | ▲ | P25325 | 3-mercaptopyruvate sulfurtransferase OS=Homo sapiens GN=MPST PE=1 SV=3 - [THTM_HUMAN]                 | 7.00  | 7.00  | 1.01 | 2.54 |
|  | ▲ | Q14574 | Desmocollin-3 OS=Homo sapiens GN=DSC3 PE=1 SV=3 - [DSC3_HUMAN]                                        | 3.00  | 3.00  | 0.98 | 2.53 |
|  | ▲ | Q9UHD8 | Septin-9 OS=Homo sapiens GN=SEPT9 PE=1 SV=2 - [SEPT9_HUMAN]                                           | 1.00  | 1.00  | 1.97 | 2.53 |
|  | ▲ | P41439 | Folate receptor gamma OS=Homo sapiens GN=FOLR3 PE=1 SV=1 - [FOLR3_HUMAN]                              | 3.00  | 5.00  | 0.78 | 2.53 |
|  | ▲ | O15372 | Eukaryotic translation initiation factor 3 subunit H OS=Homo sapiens GN=EIF3H PE=1 SV=1 - [EIF3H_HUMA | 1.00  | 1.00  | 0.67 | 2.52 |
|  | ▲ | P29279 | Connective tissue growth factor OS=Homo sapiens GN=CTGF PE=1 SV=2 - [CTGF_HUMAN]                      | 8.00  | 8.00  | 1.70 | 2.52 |
|  | ▲ | P52597 | Heterogeneous nuclear ribonucleoprotein F OS=Homo sapiens GN=HNRNPF PE=1 SV=3 - [HNRPF_HUMAN]         | 1.00  | 1.00  | 1.30 | 2.52 |
|  | ▲ | O43390 | Heterogeneous nuclear ribonucleoprotein R OS=Homo sapiens GN=HNRNPR PE=1 SV=1 - [HNRPR_HUMAN]         | 2.00  | 2.00  | 1.22 | 2.51 |
|  | ▲ | P38117 | Electron transfer flavoprotein subunit beta OS=Homo sapiens GN=ETFB PE=1 SV=3 - [ETFB_HUMAN]          | 1.00  | 1.00  | 1.18 | 2.51 |
|  | ▲ | Q99439 | Calponin-2 OS=Homo sapiens GN=CNN2 PE=1 SV=4 - [CNN2_HUMAN]                                           | 1.00  | 1.00  | 1.31 | 2.51 |
|  | ▲ | P31146 | Coronin-1A OS=Homo sapiens GN=CORO1A PE=1 SV=4 - [COR1A_HUMAN]                                        | 2.00  | 2.00  | 1.91 | 2.51 |
|  | ▲ | Q15847 | Adipose most abundant gene transcript 2 protein OS=Homo sapiens GN=APM2 PE=1 SV=1 - [APM2_HUMAN]      | 5.00  | 5.00  | 1.85 | 2.50 |
|  | ▲ | Q15942 | Zyxin OS=Homo sapiens GN=ZYX PE=1 SV=1 - [ZYX_HUMAN]                                                  | 3.00  | 3.00  | 1.75 | 2.50 |
|  | ▲ | P60985 | Keratinocyte differentiation-associated protein OS=Homo sapiens GN=KRTDAP PE=1 SV=1 - [KTDAP_HUM      | 1.00  | 1.00  | 0.98 | 2.50 |
|  | ▲ | Q9NP55 | Protein Plunc OS=Homo sapiens GN=PLUNC PE=1 SV=1 - [PLUNC_HUMAN]                                      | 4.00  | 4.00  | 1.44 | 2.49 |
|  | ▲ | Q687X5 | Metalloreductase STEAP4 OS=Homo sapiens GN=STEAP4 PE=1 SV=1 - [STEA4_HUMAN]                           | 1.00  | 1.00  | 1.29 | 2.49 |
|  | ▲ | Q15517 | Corneodesmosin OS=Homo sapiens GN=CDSN PE=1 SV=3 - [CDSN_HUMAN]                                       | 4.00  | 4.00  | 1.73 | 2.49 |
|  | ▲ | O14983 | Sarcoplasmic/endoplasmic reticulum calcium ATPase 1 OS=Homo sapiens GN=ATP2A1 PE=1 SV=1 - [AT2A1      | 1.00  | 1.00  | 1.42 | 2.48 |
|  | ▲ | Q9H361 | Polyadenylate-binding protein 3 OS=Homo sapiens GN=PABPC3 PE=1 SV=2 - [PABP3_HUMAN]                   | 2.00  | 2.00  | 1.32 | 2.47 |
|  | ▲ | Q9BVG4 | UPF0368 protein Cxorf26 OS=Homo sapiens GN=CXorf26 PE=1 SV=1 - [CX026_HUMAN]                          | 1.00  | 1.00  | 1.13 | 2.46 |
|  | ▲ | P38646 | Stress-70 protein, mitochondrial OS=Homo sapiens GN=HSPA9 PE=1 SV=2 - [GRP75_HUMAN]                   | 2.00  | 2.00  | 1.57 | 2.45 |
|  | ▲ | Q9Y279 | V-set and immunoglobulin domain-containing protein 4 OS=Homo sapiens GN=VSIG4 PE=1 SV=1 - [VSIG4_I    | 9.00  | 9.00  | 1.56 | 2.45 |
|  | ▲ | Q6E0U4 | Dermokine OS=Homo sapiens GN=DMKN PE=1 SV=3 - [DMKN_HUMAN]                                            | 4.00  | 4.00  | 1.69 | 2.45 |
|  | ▲ | P62993 | Growth factor receptor-bound protein 2 OS=Homo sapiens GN=GRB2 PE=1 SV=1 - [GRB2_HUMAN]               | 3.00  | 3.00  | 1.52 | 2.44 |
|  | ▲ | P02743 | Serum amyloid P-component OS=Homo sapiens GN=APCS PE=1 SV=2 - [SAMP_HUMAN]                            | 5.00  | 5.00  | 1.31 | 2.43 |
|  | ▲ | P19338 | Nucleolin OS=Homo sapiens GN=NCL PE=1 SV=3 - [NUCL_HUMAN]                                             | 2.00  | 2.00  | 0.96 | 2.43 |
|  | ▲ | P18136 | Ig kappa chain V-III region HIC OS=Homo sapiens PE=2 SV=1 - [KV313_HUMAN]                             | 1.00  | 6.00  | 1.73 | 2.41 |
|  | ▲ | P37837 | Transaldolase OS=Homo sapiens GN=TALDO1 PE=1 SV=2 - [TALDO_HUMAN]                                     | 5.00  | 5.00  | 1.51 | 2.40 |
|  | ▲ | Q5THK1 | Uncharacterized protein C22orf30 OS=Homo sapiens GN=C22orf30 PE=1 SV=1 - [CV030_HUMAN]                | 1.00  | 1.00  | 1.48 | 2.40 |

|  |   |        |                                                                                                       |       |       |      |      |
|--|---|--------|-------------------------------------------------------------------------------------------------------|-------|-------|------|------|
|  | ▲ | P35527 | Keratin, type I cytoskeletal 9 OS=Homo sapiens GN=KRT9 PE=1 SV=3 - [K1C9_HUMAN]                       | 12.00 | 13.00 | 1.50 | 2.39 |
|  | ▲ | Q9Y3C8 | Ubiquitin-fold modifier-conjugating enzyme 1 OS=Homo sapiens GN=UFC1 PE=1 SV=3 - [UFC1_HUMAN]         | 2.00  | 2.00  | 1.33 | 2.39 |
|  | ▲ | P00738 | Haptoglobin OS=Homo sapiens GN=HP PE=1 SV=1 - [HPT_HUMAN]                                             | 12.00 | 23.00 | 1.45 | 2.39 |
|  | ▲ | Q7Z434 | Mitochondrial antiviral-signaling protein OS=Homo sapiens GN=MAVS PE=1 SV=2 - [MAVS_HUMAN]            | 1.00  | 1.00  | 1.39 | 2.38 |
|  | ▲ | O14791 | Apolipoprotein L1 OS=Homo sapiens GN=APOL1 PE=1 SV=5 - [APOL1_HUMAN]                                  | 3.00  | 3.00  | 1.23 | 2.37 |
|  | ▲ | Q10567 | AP-1 complex subunit beta-1 OS=Homo sapiens GN=AP1B1 PE=1 SV=2 - [AP1B1_HUMAN]                        | 3.00  | 5.00  | 1.22 | 2.37 |
|  | ▲ | Q16643 | Drebrin OS=Homo sapiens GN=DBN1 PE=1 SV=4 - [DREB_HUMAN]                                              | 2.00  | 2.00  | 1.63 | 2.36 |
|  | ▲ | P14866 | Heterogeneous nuclear ribonucleoprotein L OS=Homo sapiens GN=HNRNPL PE=1 SV=2 - [HNRPL_HUMAN]         | 1.00  | 1.00  | 1.11 | 2.35 |
|  | ▲ | Q86V88 | Magnesium-dependent phosphatase 1 OS=Homo sapiens GN=MDP1 PE=1 SV=1 - [MGDP1_HUMAN]                   | 2.00  | 2.00  | 1.08 | 2.35 |
|  | ▲ | Q14696 | LDLR chaperone MESD OS=Homo sapiens GN=MESDC2 PE=1 SV=2 - [MESD_HUMAN]                                | 1.00  | 1.00  | 1.28 | 2.35 |
|  | ▲ | P04003 | C4b-binding protein alpha chain OS=Homo sapiens GN=C4BPA PE=1 SV=2 - [C4BPA_HUMAN]                    | 4.00  | 4.00  | 1.39 | 2.34 |
|  | ▲ | O75223 | Gamma-glutamylcyclotransferase OS=Homo sapiens GN=GGCT PE=1 SV=1 - [GGCT_HUMAN]                       | 7.00  | 7.00  | 1.12 | 2.34 |
|  | ▲ | O95477 | ATP-binding cassette sub-family A member 1 OS=Homo sapiens GN=ABCA1 PE=1 SV=2 - [ABCA1_HUMAN]         | 1.00  | 1.00  | 1.37 | 2.34 |
|  | ▲ | Q9NR12 | PDZ and LIM domain protein 7 OS=Homo sapiens GN=PDLIM7 PE=1 SV=1 - [PDLI7_HUMAN]                      | 2.00  | 2.00  | 1.57 | 2.32 |
|  | ▲ | Q6IBS0 | Twinfilin-2 OS=Homo sapiens GN=TWF2 PE=1 SV=2 - [TWF2_HUMAN]                                          | 2.00  | 2.00  | 1.36 | 2.32 |
|  | ▲ | P01708 | Ig lambda chain V-II region BUR OS=Homo sapiens PE=1 SV=1 - [LV205_HUMAN]                             | 1.00  | 2.00  | 1.97 | 2.31 |
|  | ▲ | O75367 | Core histone macro-H2A.1 OS=Homo sapiens GN=H2AFY PE=1 SV=4 - [H2AY_HUMAN]                            | 1.00  | 1.00  | 1.69 | 2.29 |
|  | ▲ | P30101 | Protein disulfide-isomerase A3 OS=Homo sapiens GN=PDIA3 PE=1 SV=4 - [PDIA3_HUMAN]                     | 6.00  | 6.00  | 1.37 | 2.29 |
|  | ▲ | O15467 | C-C motif chemokine 16 OS=Homo sapiens GN=CCL16 PE=1 SV=1 - [CCL16_HUMAN]                             | 1.00  | 1.00  | 1.08 | 2.28 |
|  | ▲ | P30740 | Leukocyte elastase inhibitor OS=Homo sapiens GN=SERPINB1 PE=1 SV=1 - [ILEU_HUMAN]                     | 7.00  | 7.00  | 1.31 | 2.28 |
|  | ▲ | Q8NBK3 | Sulfatase-modifying factor 1 OS=Homo sapiens GN=SUMF1 PE=1 SV=3 - [SUMF1_HUMAN]                       | 3.00  | 3.00  | 1.71 | 2.28 |
|  | ▲ | Q08830 | Fibrinogen-like protein 1 OS=Homo sapiens GN=FGL1 PE=1 SV=3 - [FGL1_HUMAN]                            | 2.00  | 2.00  | 1.04 | 2.27 |
|  | ▲ | P46976 | Glycogenin-1 OS=Homo sapiens GN=GYG1 PE=1 SV=4 - [GLYG_HUMAN]                                         | 2.00  | 2.00  | 1.22 | 2.26 |
|  | ▲ | O43504 | Hepatitis B virus X-interacting protein OS=Homo sapiens GN=HBXIP PE=1 SV=1 - [HBXIP_HUMAN]            | 2.00  | 2.00  | 1.16 | 2.26 |
|  | ▲ | O15145 | Actin-related protein 2/3 complex subunit 3 OS=Homo sapiens GN=ARPC3 PE=1 SV=3 - [ARPC3_HUMAN]        | 2.00  | 2.00  | 0.94 | 2.24 |
|  | ▲ | P01596 | Ig kappa chain V-I region CAR OS=Homo sapiens PE=1 SV=1 - [KV104_HUMAN]                               | 2.00  | 3.00  | 1.43 | 2.24 |
|  | ▲ | Q9BV57 | 1,2-dihydroxy-3-keto-5-methylthiopentene dioxygenase OS=Homo sapiens GN=ADI1 PE=1 SV=1 - [MTND_HUMAN] | 1.00  | 1.00  | 1.10 | 2.24 |
|  | ▲ | Q9UKJ1 | Paired immunoglobulin-like type 2 receptor alpha OS=Homo sapiens GN=PILRA PE=1 SV=3 - [PILRA_HUMAN]   | 2.00  | 2.00  | 1.84 | 2.24 |
|  | ▲ | Q06323 | Proteasome activator complex subunit 1 OS=Homo sapiens GN=PSME1 PE=1 SV=1 - [PSME1_HUMAN]             | 2.00  | 2.00  | 1.48 | 2.23 |
|  | ▲ | P10599 | Thioredoxin OS=Homo sapiens GN=TXN PE=1 SV=3 - [THIO_HUMAN]                                           | 7.00  | 7.00  | 1.16 | 2.22 |
|  | ▲ | P08727 | Keratin, type I cytoskeletal 19 OS=Homo sapiens GN=KRT19 PE=1 SV=3 - [K1C19_HUMAN]                    | 4.00  | 9.00  | 1.07 | 2.22 |
|  | ▲ | P26641 | Elongation factor 1-gamma OS=Homo sapiens GN=EEF1G PE=1 SV=3 - [EF1G_HUMAN]                           | 5.00  | 5.00  | 1.69 | 2.21 |
|  | ▲ | P80419 | Ig heavy chain V-III region GAR OS=Homo sapiens PE=1 SV=1 - [HV322_HUMAN]                             | 2.00  | 2.00  | 1.00 | 2.21 |
|  | ▲ | P61604 | 10 kDa heat shock protein, mitochondrial OS=Homo sapiens GN=HSPE1 PE=1 SV=2 - [CH10_HUMAN]            | 4.00  | 4.00  | 1.32 | 2.20 |
|  | ▲ | P02545 | Lamin-A/C OS=Homo sapiens GN=LMNA PE=1 SV=1 - [LMNA_HUMAN]                                            | 4.00  | 4.00  | 1.63 | 2.20 |
|  | ▲ | P51884 | Lumican OS=Homo sapiens GN=LUM PE=1 SV=2 - [LUM_HUMAN]                                                | 14.00 | 14.00 | 1.65 | 2.20 |

|  |   |        |                                                                                                                             |       |       |      |      |
|--|---|--------|-----------------------------------------------------------------------------------------------------------------------------|-------|-------|------|------|
|  | ▲ | Q8IX05 | CD302 antigen OS=Homo sapiens GN=CD302 PE=1 SV=1 - [CD302_HUMAN]                                                            | 1.00  | 1.00  | 1.46 | 2.19 |
|  | ▲ | P61086 | Ubiquitin-conjugating enzyme E2 K OS=Homo sapiens GN=UBE2K PE=1 SV=3 - [UBE2K_HUMAN]                                        | 4.00  | 4.00  | 0.99 | 2.19 |
|  | ▲ | O00339 | Matrilin-2 OS=Homo sapiens GN=MATN2 PE=1 SV=3 - [MATN2_HUMAN]                                                               | 1.00  | 1.00  | 1.78 | 2.19 |
|  | ▲ | O95633 | Follistatin-related protein 3 OS=Homo sapiens GN=FSTL3 PE=1 SV=1 - [FSTL3_HUMAN]                                            | 4.00  | 4.00  | 1.55 | 2.18 |
|  | ▲ | Q15904 | V-type proton ATPase subunit S1 OS=Homo sapiens GN=ATP6AP1 PE=1 SV=2 - [VAS1_HUMAN]                                         | 5.00  | 5.00  | 1.36 | 2.18 |
|  | ▲ | P07225 | Vitamin K-dependent protein S OS=Homo sapiens GN=PROS1 PE=1 SV=1 - [PROS_HUMAN]                                             | 6.00  | 6.00  | 1.37 | 2.18 |
|  | ▲ | Q15843 | NEDD8 OS=Homo sapiens GN=NEDD8 PE=1 SV=1 - [NEDD8_HUMAN]                                                                    | 1.00  | 1.00  | 0.82 | 2.17 |
|  | ▲ | P20039 | HLA class II histocompatibility antigen, DRB1-11 beta chain OS=Homo sapiens GN=HLA-DRB1 PE=2 SV=1 - [DRB1_HUMAN]            | 2.00  | 2.00  | 0.53 | 2.17 |
|  | ▲ | Q9Y2V2 | Calcium-regulated heat stable protein 1 OS=Homo sapiens GN=CARHSP1 PE=1 SV=2 - [CHSP1_HUMAN]                                | 2.00  | 2.00  | 0.92 | 2.16 |
|  | ▲ | P29622 | Kallistatin OS=Homo sapiens GN=SERPINA4 PE=1 SV=3 - [KAIN_HUMAN]                                                            | 16.00 | 16.00 | 1.15 | 2.16 |
|  | ▲ | P54725 | UV excision repair protein RAD23 homolog A OS=Homo sapiens GN=RAD23A PE=1 SV=1 - [RD23A_HUMAN]                              | 2.00  | 3.00  | 1.90 | 2.15 |
|  | ▲ | P52272 | Heterogeneous nuclear ribonucleoprotein M OS=Homo sapiens GN=HNRNPM PE=1 SV=3 - [HNRPM_HUMAN]                               | 2.00  | 2.00  | 1.04 | 2.15 |
|  | ▲ | Q5VY80 | Retinoic acid early transcript 1L protein OS=Homo sapiens GN=RAET1L PE=2 SV=1 - [RET1L_HUMAN]                               | 1.00  | 1.00  | 1.98 | 2.15 |
|  | ▲ | Q1KMD3 | Heterogeneous nuclear ribonucleoprotein U-like protein 2 OS=Homo sapiens GN=HNRNPUL2 PE=1 SV=1 - [HNPUL2_HUMAN]             | 3.00  | 3.00  | 1.93 | 2.14 |
|  | ▲ | Q9P0L0 | Vesicle-associated membrane protein-associated protein A OS=Homo sapiens GN=VAPA PE=1 SV=3 - [VAPA_HUMAN]                   | 1.00  | 1.00  | 1.31 | 2.14 |
|  | ▲ | Q08623 | Haloacid dehalogenase-like hydrolase domain-containing protein 1A OS=Homo sapiens GN=HDHD1A PE=1 SV=1 - [HDHD1A_HUMAN]      | 4.00  | 4.00  | 1.01 | 2.14 |
|  | ▲ | P01598 | Ig kappa chain V-I region EU OS=Homo sapiens PE=1 SV=1 - [KV106_HUMAN]                                                      | 2.00  | 3.00  | 1.68 | 2.14 |
|  | ▲ | P35858 | Insulin-like growth factor-binding protein complex acid labile subunit OS=Homo sapiens GN=IGFALS PE=1 SV=1 - [IGFALS_HUMAN] | 6.00  | 6.00  | 1.15 | 2.14 |
|  | ▲ | O76070 | Gamma-synuclein OS=Homo sapiens GN=SNCG PE=1 SV=2 - [SYUG_HUMAN]                                                            | 5.00  | 5.00  | 1.10 | 2.13 |
|  | ▲ | Q9UBP4 | Dickkopf-related protein 3 OS=Homo sapiens GN=DKK3 PE=1 SV=1 - [DKK3_HUMAN]                                                 | 5.00  | 5.00  | 1.59 | 2.13 |
|  | ▲ | P01600 | Ig kappa chain V-I region Hau OS=Homo sapiens PE=1 SV=1 - [KV108_HUMAN]                                                     | 1.00  | 2.00  | 1.58 | 2.13 |
|  | ▲ | P13796 | Plastin-2 OS=Homo sapiens GN=LCP1 PE=1 SV=5 - [PLSL_HUMAN]                                                                  | 19.00 | 25.00 | 1.41 | 2.13 |
|  | ▲ | O43865 | Putative adenosylhomocysteinase 2 OS=Homo sapiens GN=AHCYL1 PE=1 SV=2 - [SAHH2_HUMAN]                                       | 1.00  | 2.00  | 1.82 | 2.13 |
|  | ▲ | Q4KMP7 | TBC1 domain family member 10B OS=Homo sapiens GN=TBC1D10B PE=1 SV=3 - [TB10B_HUMAN]                                         | 2.00  | 2.00  | 1.57 | 2.12 |
|  | ▲ | P06753 | Tropomyosin alpha-3 chain OS=Homo sapiens GN=TPM3 PE=1 SV=1 - [TPM3_HUMAN]                                                  | 1.00  | 4.00  | 1.69 | 2.12 |
|  | ▲ | Q86Y82 | Syntaxin-12 OS=Homo sapiens GN=STX12 PE=1 SV=1 - [STX12_HUMAN]                                                              | 1.00  | 1.00  | 0.93 | 2.12 |
|  | ▲ | P05156 | Complement factor I OS=Homo sapiens GN=CFI PE=1 SV=1 - [CFAI_HUMAN]                                                         | 19.00 | 19.00 | 1.81 | 2.12 |
|  | ▲ | P48052 | Carboxypeptidase A2 OS=Homo sapiens GN=CPA2 PE=1 SV=3 - [CBPA2_HUMAN]                                                       | 1.00  | 1.00  | 1.43 | 2.11 |
|  | ▲ | P02794 | Ferritin heavy chain OS=Homo sapiens GN=FTH1 PE=1 SV=2 - [FRIH_HUMAN]                                                       | 6.00  | 6.00  | 0.81 | 2.11 |
|  | ▲ | Q9NP84 | Tumor necrosis factor receptor superfamily member 12A OS=Homo sapiens GN=TNFRSF12A PE=1 SV=1 - [TNFRSF12A_HUMAN]            | 1.00  | 1.00  | 1.86 | 2.10 |
|  | ▲ | O75347 | Tubulin-specific chaperone A OS=Homo sapiens GN=TBCA PE=1 SV=3 - [TBCA_HUMAN]                                               | 5.00  | 5.00  | 0.55 | 2.10 |
|  | ▲ | P82980 | Retinol-binding protein 5 OS=Homo sapiens GN=RBP5 PE=1 SV=3 - [RET5_HUMAN]                                                  | 4.00  | 4.00  | 1.06 | 2.09 |
|  | ▲ | P09958 | Furin OS=Homo sapiens GN=FURIN PE=1 SV=2 - [FURIN_HUMAN]                                                                    | 2.00  | 2.00  | 1.42 | 2.08 |
|  | ▲ | P58335 | Anthrax toxin receptor 2 OS=Homo sapiens GN=ANTXR2 PE=1 SV=4 - [ANTR2_HUMAN]                                                | 3.00  | 3.00  | 1.87 | 2.08 |
|  | ▲ | P49773 | Histidine triad nucleotide-binding protein 1 OS=Homo sapiens GN=HINT1 PE=1 SV=2 - [HINT1_HUMAN]                             | 1.00  | 1.00  | 1.23 | 2.08 |
|  | ▲ | P51888 | Prolargin OS=Homo sapiens GN=PRELP PE=1 SV=1 - [PRELP_HUMAN]                                                                | 1.00  | 1.00  | 1.16 | 2.08 |



|   |   |                                                       |                                                                                                                            |       |       |      |      |
|---|---|-------------------------------------------------------|----------------------------------------------------------------------------------------------------------------------------|-------|-------|------|------|
|   | ▲ | Q99952                                                | Tyrosine-protein phosphatase non-receptor type 18 OS=Homo sapiens GN=PTPN18 PE=1 SV=2 - [PTN18_HUMAN]                      | 1.00  | 1.00  | 1.03 | 2.08 |
|   | ▲ | Q9NUQ9                                                | Protein FAM49B OS=Homo sapiens GN=FAM49B PE=1 SV=1 - [FA49B_HUMAN]                                                         | 6.00  | 6.00  | 1.20 | 2.06 |
|   | ▲ | P12724                                                | Eosinophil cationic protein OS=Homo sapiens GN=RNASE3 PE=1 SV=2 - [ECP_HUMAN]                                              | 3.00  | 3.00  | 1.38 | 2.05 |
|   | ▲ | Q9Y6W5                                                | Wiskott-Aldrich syndrome protein family member 2 OS=Homo sapiens GN=WASF2 PE=1 SV=3 - [WASF2_HUMAN]                        | 1.00  | 1.00  | 1.19 | 2.05 |
|   | ▲ | O95861                                                | 3'(2'),5'-bisphosphate nucleotidase 1 OS=Homo sapiens GN=BPNT1 PE=1 SV=1 - [BPNT1_HUMAN]                                   | 7.00  | 7.00  | 1.57 | 2.05 |
|   | ▲ | P26368                                                | Splicing factor U2AF 65 kDa subunit OS=Homo sapiens GN=U2AF2 PE=1 SV=4 - [U2AF2_HUMAN]                                     | 1.00  | 1.00  | 1.35 | 2.04 |
|   | ▲ | O95747                                                | Serine/threonine-protein kinase OSR1 OS=Homo sapiens GN=OXSR1 PE=1 SV=1 - [OXSR1_HUMAN]                                    | 2.00  | 2.00  | 1.42 | 2.04 |
|   | ▲ | P21980                                                | Protein-glutamine gamma-glutamyltransferase 2 OS=Homo sapiens GN=TGM2 PE=1 SV=2 - [TGM2_HUMAN]                             | 4.00  | 4.00  | 1.14 | 2.04 |
|   | ▲ | Q8TE58                                                | A disintegrin and metalloproteinase with thrombospondin motifs 15 OS=Homo sapiens GN=ADAMTS15 PE=2 SV=1 - [ADAMTS15_HUMAN] | 1.00  | 1.00  | 0.87 | 2.03 |
|   | ▲ | Q8WW15                                                | Choline transporter-like protein 1 OS=Homo sapiens GN=SLC44A1 PE=1 SV=1 - [CTL1_HUMAN]                                     | 1.00  | 1.00  | 1.82 | 2.03 |
|   | ▲ | Q96AB3                                                | Isochorismatase domain-containing protein 2, mitochondrial OS=Homo sapiens GN=ISOC2 PE=1 SV=1 - [ISOC2_HUMAN]              | 1.00  | 1.00  | 1.51 | 2.02 |
|   | ▲ | P07307                                                | Asialoglycoprotein receptor 2 OS=Homo sapiens GN=ASGR2 PE=1 SV=2 - [ASGR2_HUMAN]                                           | 5.00  | 5.00  | 1.49 | 2.02 |
|   | ▲ | Q9Y490                                                | Talin-1 OS=Homo sapiens GN=TLN1 PE=1 SV=3 - [TLN1_HUMAN]                                                                   | 16.00 | 16.00 | 1.61 | 2.02 |
|   | ▲ | Q9C0C2                                                | 182 kDa tankyrase-1-binding protein OS=Homo sapiens GN=TNKS1BP1 PE=1 SV=3 - [TB182_HUMAN]                                  | 1.00  | 1.00  | 1.00 | 2.02 |
|   | ▲ | P01604                                                | Ig kappa chain V-I region Kue OS=Homo sapiens PE=1 SV=1 - [KV112_HUMAN]                                                    | 2.00  | 2.00  | 1.56 | 2.01 |
|   | ▲ | Q8N5J2                                                | Protein FAM63A OS=Homo sapiens GN=FAM63A PE=1 SV=1 - [FA63A_HUMAN]                                                         | 1.00  | 1.00  | 1.65 | 2.01 |
|   | ▲ | O60234                                                | Glia maturation factor gamma OS=Homo sapiens GN=GMFG PE=1 SV=1 - [GMFG_HUMAN]                                              | 1.00  | 2.00  | 1.83 | 2.00 |
|   | ▲ | P04179                                                | Superoxide dismutase [Mn], mitochondrial OS=Homo sapiens GN=SOD2 PE=1 SV=2 - [SODM_HUMAN]                                  | 5.00  | 5.00  | 1.14 | 2.00 |
|   |   | <b>Down-Regulated Proteins in two Subgroups (109)</b> |                                                                                                                            |       |       |      |      |
| ▽ | ▽ | P13647                                                | Keratin, type II cytoskeletal 5 OS=Homo sapiens GN=KRT5 PE=1 SV=3 - [K2C5_HUMAN]                                           | 5.00  | 13.00 | 0.47 | 0.48 |
| ▽ | ▽ | P54578                                                | Ubiquitin carboxyl-terminal hydrolase 14 OS=Homo sapiens GN=USP14 PE=1 SV=3 - [UBP14_HUMAN]                                | 1.00  | 1.00  | 0.36 | 0.48 |
| ▽ | ▽ | P21281                                                | V-type proton ATPase subunit B, brain isoform OS=Homo sapiens GN=ATP6V1B2 PE=1 SV=3 - [VATB2_HUMAN]                        | 1.00  | 1.00  | 0.42 | 0.48 |
| ▽ | ▽ | O43895                                                | Xaa-Pro aminopeptidase 2 OS=Homo sapiens GN=XPNPEP2 PE=1 SV=3 - [XPP2_HUMAN]                                               | 3.00  | 3.00  | 0.47 | 0.48 |
| ▽ | ▽ | Q9UGB7                                                | Inositol oxygenase OS=Homo sapiens GN=MIOX PE=1 SV=1 - [MIOX_HUMAN]                                                        | 2.00  | 2.00  | 0.34 | 0.47 |
| ▽ | ▽ | P61457                                                | Pterin-4-alpha-carbinolamine dehydratase OS=Homo sapiens GN=PCBD1 PE=1 SV=2 - [PHS_HUMAN]                                  | 1.00  | 1.00  | 0.29 | 0.47 |
| ▽ | ▽ | P02538                                                | Keratin, type II cytoskeletal 6A OS=Homo sapiens GN=KRT6A PE=1 SV=3 - [K2C6A_HUMAN]                                        | 5.00  | 14.00 | 0.40 | 0.47 |
| ▽ | ▽ | Q66K79                                                | Carboxypeptidase Z OS=Homo sapiens GN=CPZ PE=1 SV=2 - [CBPZ_HUMAN]                                                         | 3.00  | 3.00  | 0.45 | 0.47 |
| ▽ | ▽ | Q9Y6U3                                                | Adseverin OS=Homo sapiens GN=SCIN PE=1 SV=4 - [ADSV_HUMAN]                                                                 | 2.00  | 2.00  | 0.47 | 0.46 |
| ▽ | ▽ | P13797                                                | Plastin-3 OS=Homo sapiens GN=PLS3 PE=1 SV=4 - [PLST_HUMAN]                                                                 | 4.00  | 10.00 | 0.48 | 0.44 |
| ▽ | ▽ | P48061                                                | Stromal cell-derived factor 1 OS=Homo sapiens GN=CXCL12 PE=1 SV=1 - [SDF1_HUMAN]                                           | 2.00  | 2.00  | 0.39 | 0.44 |
| ▽ | ▽ | Q8N2U0                                                | UPF0451 protein C17orf61 OS=Homo sapiens GN=C17orf61 PE=2 SV=1 - [CQ061_HUMAN]                                             | 2.00  | 2.00  | 0.33 | 0.44 |
| ▽ | ▽ | Q9Y5K6                                                | CD2-associated protein OS=Homo sapiens GN=CD2AP PE=1 SV=1 - [CD2AP_HUMAN]                                                  | 2.00  | 2.00  | 0.49 | 0.44 |
| ▽ | ▽ | Q68BL7                                                | Olfactomedin-like protein 2A OS=Homo sapiens GN=OLFML2A PE=2 SV=1 - [OLM2A_HUMAN]                                          | 1.00  | 1.00  | 0.44 | 0.43 |
| ▽ | ▽ | P15907                                                | Beta-galactoside alpha-2,6-sialyltransferase 1 OS=Homo sapiens GN=ST6GAL1 PE=1 SV=1 - [SIAT1_HUMAN]                        | 1.00  | 1.00  | 0.38 | 0.43 |
| ▽ | ▽ | P37235                                                | Hippocalcin-like protein 1 OS=Homo sapiens GN=HPCAL1 PE=1 SV=3 - [HPCL1_HUMAN]                                             | 2.00  | 2.00  | 0.43 | 0.43 |
| ▽ | ▽ | P22732                                                | Solute carrier family 2, facilitated glucose transporter member 5 OS=Homo sapiens GN=SLC2A5 PE=1 SV=1 - [SLC2A5_HUMAN]     | 4.00  | 4.00  | 0.47 | 0.42 |

|   |   |        |                                                                                                                 |       |       |      |      |
|---|---|--------|-----------------------------------------------------------------------------------------------------------------|-------|-------|------|------|
| ▽ | ▽ | Q9UL25 | Ras-related protein Rab-21 OS=Homo sapiens GN=RAB21 PE=1 SV=3 - [RAB21_HUMAN]                                   | 1.00  | 1.00  | 0.50 | 0.42 |
| ▽ | ▽ | P36543 | V-type proton ATPase subunit E 1 OS=Homo sapiens GN=ATP6V1E1 PE=1 SV=1 - [VATE1_HUMAN]                          | 4.00  | 4.00  | 0.49 | 0.41 |
| ▽ | ▽ | Q86UN2 | Reticulon-4 receptor-like 1 OS=Homo sapiens GN=RTN4RL1 PE=2 SV=1 - [R4RL1_HUMAN]                                | 1.00  | 1.00  | 0.48 | 0.41 |
| ▽ | ▽ | P55822 | SH3 domain-binding glutamic acid-rich protein OS=Homo sapiens GN=SH3BGR PE=1 SV=3 - [SH3BG_HUMAN]               | 1.00  | 1.00  | 0.39 | 0.39 |
| ▽ | ▽ | Q9Y5H7 | Protocadherin alpha-5 OS=Homo sapiens GN=PCDHA5 PE=1 SV=1 - [PCDA5_HUMAN]                                       | 2.00  | 2.00  | 0.49 | 0.39 |
| ▽ | ▽ | O75695 | Protein XRP2 OS=Homo sapiens GN=RP2 PE=1 SV=4 - [XRP2_HUMAN]                                                    | 1.00  | 1.00  | 0.45 | 0.38 |
| ▽ | ▽ | P01189 | Pro-opiomelanocortin OS=Homo sapiens GN=POMC PE=1 SV=2 - [COLI_HUMAN]                                           | 2.00  | 2.00  | 0.38 | 0.38 |
| ▽ | ▽ | P35321 | Cornifin-A OS=Homo sapiens GN=SPRR1A PE=1 SV=2 - [SPR1A_HUMAN]                                                  | 3.00  | 3.00  | 0.49 | 0.37 |
| ▽ | ▽ | Q9NQS3 | Poliovirus receptor-related protein 3 OS=Homo sapiens GN=PVRL3 PE=1 SV=1 - [PVRL3_HUMAN]                        | 2.00  | 2.00  | 0.47 | 0.37 |
| ▽ | ▽ | P08238 | Heat shock protein HSP 90-beta OS=Homo sapiens GN=HSP90AB1 PE=1 SV=4 - [HS90B_HUMAN]                            | 3.00  | 9.00  | 0.45 | 0.37 |
| ▽ | ▽ | P08473 | Neprilysin OS=Homo sapiens GN=MME PE=1 SV=2 - [NEP_HUMAN]                                                       | 26.00 | 26.00 | 0.37 | 0.36 |
| ▽ | ▽ | P56199 | Integrin alpha-1 OS=Homo sapiens GN=ITGA1 PE=1 SV=2 - [ITA1_HUMAN]                                              | 1.00  | 1.00  | 0.50 | 0.36 |
| ▽ | ▽ | A0AVF1 | Tetratricopeptide repeat protein 26 OS=Homo sapiens GN=TTC26 PE=2 SV=1 - [TTC26_HUMAN]                          | 1.00  | 1.00  | 0.48 | 0.36 |
| ▽ | ▽ | Q8WWT9 | Solute carrier family 13 member 3 OS=Homo sapiens GN=SLC13A3 PE=2 SV=1 - [S13A3_HUMAN]                          | 1.00  | 1.00  | 0.49 | 0.35 |
| ▽ | ▽ | P98161 | Polycystin-1 OS=Homo sapiens GN=PKD1 PE=1 SV=3 - [PKD1_HUMAN]                                                   | 1.00  | 1.00  | 0.48 | 0.35 |
| ▽ | ▽ | P52434 | DNA-directed RNA polymerases I, II, and III subunit RPABC3 OS=Homo sapiens GN=POLR2H PE=1 SV=4 - [POLR2H_HUMAN] | 1.00  | 1.00  | 0.46 | 0.35 |
| ▽ | ▽ | P55017 | Solute carrier family 12 member 3 OS=Homo sapiens GN=SLC12A3 PE=1 SV=2 - [S12A3_HUMAN]                          | 6.00  | 6.00  | 0.42 | 0.35 |
| ▽ | ▽ | O43511 | Pendrin OS=Homo sapiens GN=SLC26A4 PE=1 SV=1 - [S26A4_HUMAN]                                                    | 2.00  | 2.00  | 0.33 | 0.35 |
| ▽ | ▽ | P14555 | Phospholipase A2, membrane associated OS=Homo sapiens GN=PLA2G2A PE=1 SV=2 - [PA2GA_HUMAN]                      | 1.00  | 1.00  | 0.30 | 0.34 |
| ▽ | ▽ | P07602 | Proactivator polypeptide OS=Homo sapiens GN=PSAP PE=1 SV=2 - [SAP_HUMAN]                                        | 18.00 | 18.00 | 0.45 | 0.33 |
| ▽ | ▽ | Q495M3 | Proton-coupled amino acid transporter 2 OS=Homo sapiens GN=SLC36A2 PE=2 SV=1 - [S36A2_HUMAN]                    | 3.00  | 3.00  | 0.49 | 0.33 |
| ▽ | ▽ | Q9H9H4 | Vacuolar protein sorting-associated protein 37B OS=Homo sapiens GN=VPS37B PE=1 SV=1 - [VP37B_HUMAN]             | 2.00  | 2.00  | 0.46 | 0.33 |
| ▽ | ▽ | P13646 | Keratin, type I cytoskeletal 13 OS=Homo sapiens GN=KRT13 PE=1 SV=4 - [K1C13_HUMAN]                              | 1.00  | 4.00  | 0.40 | 0.33 |
| ▽ | ▽ | P29972 | Aquaporin-1 OS=Homo sapiens GN=AQP1 PE=1 SV=3 - [AQP1_HUMAN]                                                    | 2.00  | 2.00  | 0.47 | 0.33 |
| ▽ | ▽ | P08758 | Annexin A5 OS=Homo sapiens GN=ANXA5 PE=1 SV=2 - [ANXA5_HUMAN]                                                   | 13.00 | 13.00 | 0.42 | 0.33 |
| ▽ | ▽ | P55209 | Nucleosome assembly protein 1-like 1 OS=Homo sapiens GN=NAP1L1 PE=1 SV=1 - [NP1L1_HUMAN]                        | 1.00  | 1.00  | 0.43 | 0.32 |
| ▽ | ▽ | Q99584 | Protein S100-A13 OS=Homo sapiens GN=S100A13 PE=1 SV=1 - [S10AD_HUMAN]                                           | 4.00  | 4.00  | 0.44 | 0.31 |
| ▽ | ▽ | P07288 | Prostate-specific antigen OS=Homo sapiens GN=KLK3 PE=1 SV=2 - [KLK3_HUMAN]                                      | 11.00 | 12.00 | 0.45 | 0.31 |
| ▽ | ▽ | P08637 | Low affinity immunoglobulin gamma Fc region receptor III-A OS=Homo sapiens GN=FCGR3A PE=2 SV=2 - [FCGR3A_HUMAN] | 1.00  | 2.00  | 0.39 | 0.30 |
| ▽ | ▽ | Q8N163 | Protein KIAA1967 OS=Homo sapiens GN=KIAA1967 PE=1 SV=2 - [K1967_HUMAN]                                          | 1.00  | 1.00  | 0.46 | 0.30 |
| ▽ | ▽ | Q9ULC0 | Endomucin OS=Homo sapiens GN=EMCN PE=1 SV=2 - [MUCEN_HUMAN]                                                     | 3.00  | 3.00  | 0.50 | 0.30 |
| ▽ | ▽ | O00194 | Ras-related protein Rab-27B OS=Homo sapiens GN=RAB27B PE=1 SV=4 - [RB27B_HUMAN]                                 | 3.00  | 4.00  | 0.43 | 0.30 |
| ▽ | ▽ | P08133 | Annexin A6 OS=Homo sapiens GN=ANXA6 PE=1 SV=3 - [ANXA6_HUMAN]                                                   | 3.00  | 3.00  | 0.42 | 0.30 |
| ▽ | ▽ | P20337 | Ras-related protein Rab-3B OS=Homo sapiens GN=RAB3B PE=1 SV=2 - [RAB3B_HUMAN]                                   | 3.00  | 4.00  | 0.35 | 0.30 |
| ▽ | ▽ | Q9UIK5 | Tomoregulin-2 OS=Homo sapiens GN=TMEFF2 PE=1 SV=1 - [TEFF2_HUMAN]                                               | 1.00  | 1.00  | 0.47 | 0.29 |
| ▽ | ▽ | P16066 | Atrial natriuretic peptide receptor 1 OS=Homo sapiens GN=NPR1 PE=1 SV=1 - [ANPRA_HUMAN]                         | 1.00  | 1.00  | 0.44 | 0.29 |

|   |   |        |                                                                                                             |       |       |      |      |
|---|---|--------|-------------------------------------------------------------------------------------------------------------|-------|-------|------|------|
| ▽ | ▽ | P51654 | Glypican-3 OS=Homo sapiens GN=GPC3 PE=1 SV=1 - [GPC3_HUMAN]                                                 | 4.00  | 4.00  | 0.45 | 0.29 |
| ▽ | ▽ | P47972 | Neuronal pentraxin-2 OS=Homo sapiens GN=NPTX2 PE=1 SV=2 - [NPTX2_HUMAN]                                     | 1.00  | 1.00  | 0.43 | 0.28 |
| ▽ | ▽ | P31431 | Syndecan-4 OS=Homo sapiens GN=SDC4 PE=1 SV=2 - [SDC4_HUMAN]                                                 | 4.00  | 4.00  | 0.50 | 0.28 |
| ▽ | ▽ | Q13867 | Bleomycin hydrolase OS=Homo sapiens GN=BLMH PE=1 SV=1 - [BLMH_HUMAN]                                        | 4.00  | 4.00  | 0.29 | 0.28 |
| ▽ | ▽ | Q14108 | Lysosome membrane protein 2 OS=Homo sapiens GN=SCARB2 PE=1 SV=2 - [SCRB2_HUMAN]                             | 2.00  | 2.00  | 0.30 | 0.28 |
| ▽ | ▽ | P23458 | Tyrosine-protein kinase JAK1 OS=Homo sapiens GN=JAK1 PE=1 SV=2 - [JAK1_HUMAN]                               | 1.00  | 1.00  | 0.45 | 0.27 |
| ▽ | ▽ | Q9Y376 | Calcium-binding protein 39 OS=Homo sapiens GN=CAB39 PE=1 SV=1 - [CAB39_HUMAN]                               | 1.00  | 1.00  | 0.34 | 0.27 |
| ▽ | ▽ | P30626 | Sorcin OS=Homo sapiens GN=SRI PE=1 SV=1 - [SORCN_HUMAN]                                                     | 4.00  | 4.00  | 0.23 | 0.27 |
| ▽ | ▽ | Q8N4F0 | Bactericidal/permeability-increasing protein-like 1 OS=Homo sapiens GN=BPIL1 PE=1 SV=2 - [BPIL1_HUMAN]      | 1.00  | 1.00  | 0.42 | 0.27 |
| ▽ | ▽ | P21926 | CD9 antigen OS=Homo sapiens GN=CD9 PE=1 SV=4 - [CD9_HUMAN]                                                  | 3.00  | 3.00  | 0.35 | 0.26 |
| ▽ | ▽ | Q6UX73 | Uncharacterized protein C16orf89 OS=Homo sapiens GN=C16orf89 PE=2 SV=2 - [CP089_HUMAN]                      | 7.00  | 7.00  | 0.44 | 0.26 |
| ▽ | ▽ | O43692 | Peptidase inhibitor 15 OS=Homo sapiens GN=PI15 PE=1 SV=1 - [PI15_HUMAN]                                     | 2.00  | 3.00  | 0.46 | 0.26 |
| ▽ | ▽ | Q08188 | Protein-glutamine gamma-glutamyltransferase E OS=Homo sapiens GN=TGM3 PE=1 SV=4 - [TGM3_HUMAN]              | 4.00  | 4.00  | 0.37 | 0.25 |
| ▽ | ▽ | Q9UK41 | Vacuolar protein sorting-associated protein 28 homolog OS=Homo sapiens GN=VPS28 PE=1 SV=1 - [VPS28_HUMAN]   | 8.00  | 8.00  | 0.49 | 0.25 |
| ▽ | ▽ | Q6IPM2 | IQ domain-containing protein E OS=Homo sapiens GN=IQCE PE=1 SV=2 - [IQCE_HUMAN]                             | 1.00  | 1.00  | 0.39 | 0.24 |
| ▽ | ▽ | Q9BV36 | Melanophilin OS=Homo sapiens GN=MLPH PE=1 SV=1 - [MELPH_HUMAN]                                              | 1.00  | 1.00  | 0.35 | 0.24 |
| ▽ | ▽ | P55259 | Pancreatic secretory granule membrane major glycoprotein GP2 OS=Homo sapiens GN=GP2 PE=2 SV=3 - [GP2_HUMAN] | 8.00  | 8.00  | 0.48 | 0.23 |
| ▽ | ▽ | P01266 | Thyroglobulin OS=Homo sapiens GN=TG PE=1 SV=5 - [THYG_HUMAN]                                                | 1.00  | 1.00  | 0.43 | 0.23 |
| ▽ | ▽ | Q08629 | Testican-1 OS=Homo sapiens GN=SPOCK1 PE=1 SV=1 - [TICN1_HUMAN]                                              | 2.00  | 2.00  | 0.34 | 0.23 |
| ▽ | ▽ | P12277 | Creatine kinase B-type OS=Homo sapiens GN=CKB PE=1 SV=1 - [KCRB_HUMAN]                                      | 9.00  | 9.00  | 0.38 | 0.23 |
| ▽ | ▽ | O95183 | Vesicle-associated membrane protein 5 OS=Homo sapiens GN=VAMP5 PE=1 SV=1 - [VAMP5_HUMAN]                    | 1.00  | 1.00  | 0.49 | 0.22 |
| ▽ | ▽ | O00219 | Hyaluronan synthase 3 OS=Homo sapiens GN=HAS3 PE=2 SV=3 - [HAS3_HUMAN]                                      | 1.00  | 1.00  | 0.46 | 0.22 |
| ▽ | ▽ | Q9NQ84 | G-protein coupled receptor family C group 5 member C OS=Homo sapiens GN=GPRC5C PE=1 SV=2 - [GPC5C_HUMAN]    | 7.00  | 7.00  | 0.45 | 0.22 |
| ▽ | ▽ | Q9Y3R5 | Protein dopey-2 OS=Homo sapiens GN=DOPEY2 PE=1 SV=4 - [DOP2_HUMAN]                                          | 3.00  | 3.00  | 0.38 | 0.22 |
| ▽ | ▽ | Q8IYJ3 | Synaptotagmin-like protein 1 OS=Homo sapiens GN=SYTL1 PE=1 SV=1 - [SYTL1_HUMAN]                             | 1.00  | 1.00  | 0.29 | 0.21 |
| ▽ | ▽ | Q9BTM9 | Ubiquitin-related modifier 1 homolog OS=Homo sapiens GN=URM1 PE=1 SV=1 - [URM1_HUMAN]                       | 2.00  | 2.00  | 0.22 | 0.21 |
| ▽ | ▽ | Q9UBV8 | Peflin OS=Homo sapiens GN=PEF1 PE=1 SV=1 - [PEF1_HUMAN]                                                     | 3.00  | 3.00  | 0.46 | 0.20 |
| ▽ | ▽ | P20138 | Myeloid cell surface antigen CD33 OS=Homo sapiens GN=CD33 PE=1 SV=2 - [CD33_HUMAN]                          | 1.00  | 1.00  | 0.49 | 0.20 |
| ▽ | ▽ | P06870 | Kallikrein-1 OS=Homo sapiens GN=KLK1 PE=1 SV=2 - [KLK1_HUMAN]                                               | 9.00  | 9.00  | 0.47 | 0.19 |
| ▽ | ▽ | P15309 | Prostatic acid phosphatase OS=Homo sapiens GN=ACPP PE=1 SV=3 - [PPAP_HUMAN]                                 | 12.00 | 12.00 | 0.31 | 0.19 |
| ▽ | ▽ | P28907 | ADP-ribosyl cyclase 1 OS=Homo sapiens GN=CD38 PE=1 SV=2 - [CD38_HUMAN]                                      | 2.00  | 2.00  | 0.23 | 0.19 |
| ▽ | ▽ | P51159 | Ras-related protein Rab-27A OS=Homo sapiens GN=RAB27A PE=1 SV=3 - [RB27A_HUMAN]                             | 2.00  | 3.00  | 0.29 | 0.19 |
| ▽ | ▽ | Q9H9K5 | Uncharacterized protein LP9056 OS=Homo sapiens GN=LP9056 PE=2 SV=1 - [L9056_HUMAN]                          | 1.00  | 1.00  | 0.38 | 0.19 |
| ▽ | ▽ | P24855 | Deoxyribonuclease-1 OS=Homo sapiens GN=DNASE1 PE=1 SV=1 - [DNAS1_HUMAN]                                     | 8.00  | 8.00  | 0.42 | 0.19 |
| ▽ | ▽ | Q9Y277 | Voltage-dependent anion-selective channel protein 3 OS=Homo sapiens GN=VDAC3 PE=1 SV=1 - [VDAC3_HUMAN]      | 1.00  | 1.00  | 0.12 | 0.18 |
| ▽ | ▽ | Q9H1C7 | UPF0467 protein C5orf32 OS=Homo sapiens GN=C5orf32 PE=2 SV=1 - [CE032_HUMAN]                                | 1.00  | 1.00  | 0.39 | 0.18 |

|   |   |                                                           |                                                                                                       |       |       |      |      |
|---|---|-----------------------------------------------------------|-------------------------------------------------------------------------------------------------------|-------|-------|------|------|
| ▽ | ▽ | Q96PX8                                                    | SLIT and NTRK-like protein 1 OS=Homo sapiens GN=SLITRK1 PE=1 SV=2 - [SLIK1_HUMAN]                     | 2.00  | 2.00  | 0.33 | 0.18 |
| ▽ | ▽ | Q9H0B8                                                    | Cysteine-rich secretory protein LCCL domain-containing 2 OS=Homo sapiens GN=CRISPLD2 PE=1 SV=1 - [C   | 5.00  | 6.00  | 0.31 | 0.18 |
| ▽ | ▽ | P08118                                                    | Beta-microseminoprotein OS=Homo sapiens GN=MSMB PE=1 SV=1 - [MSMB_HUMAN]                              | 2.00  | 2.00  | 0.26 | 0.18 |
| ▽ | ▽ | O14494                                                    | Lipid phosphate phosphohydrolase 1 OS=Homo sapiens GN=PPAP2A PE=1 SV=1 - [LPP1_HUMAN]                 | 3.00  | 3.00  | 0.42 | 0.17 |
| ▽ | ▽ | Q99732                                                    | Lipopolysaccharide-induced tumor necrosis factor-alpha factor OS=Homo sapiens GN=LITAF PE=1 SV=2 - [L | 1.00  | 1.00  | 0.35 | 0.17 |
| ▽ | ▽ | Q16348                                                    | Solute carrier family 15 member 2 OS=Homo sapiens GN=SLC15A2 PE=2 SV=2 - [S15A2_HUMAN]                | 1.00  | 1.00  | 0.35 | 0.17 |
| ▽ | ▽ | P21439                                                    | Multidrug resistance protein 3 OS=Homo sapiens GN=ABCB4 PE=1 SV=2 - [MDR3_HUMAN]                      | 1.00  | 1.00  | 0.36 | 0.17 |
| ▽ | ▽ | Q9NZH0                                                    | G-protein coupled receptor family C group 5 member B OS=Homo sapiens GN=GPRC5B PE=2 SV=2 - [GPC5      | 2.00  | 2.00  | 0.43 | 0.17 |
| ▽ | ▽ | P19835                                                    | Bile salt-activated lipase OS=Homo sapiens GN=CEL PE=1 SV=3 - [CEL_HUMAN]                             | 17.00 | 17.00 | 0.42 | 0.17 |
| ▽ | ▽ | Q9UBC9                                                    | Small proline-rich protein 3 OS=Homo sapiens GN=SPRR3 PE=1 SV=2 - [SPRR3_HUMAN]                       | 11.00 | 11.00 | 0.42 | 0.16 |
| ▽ | ▽ | O15393                                                    | Transmembrane protease serine 2 OS=Homo sapiens GN=TMPRSS2 PE=1 SV=3 - [TMPS2_HUMAN]                  | 4.00  | 4.00  | 0.41 | 0.16 |
| ▽ | ▽ | P14410                                                    | Sucrase-isomaltase, intestinal OS=Homo sapiens GN=SI PE=1 SV=5 - [SUIS_HUMAN]                         | 1.00  | 2.00  | 0.27 | 0.15 |
| ▽ | ▽ | P01225                                                    | Follitropin subunit beta OS=Homo sapiens GN=FSHB PE=1 SV=2 - [FSHB_HUMAN]                             | 2.00  | 2.00  | 0.44 | 0.15 |
| ▽ | ▽ | P28906                                                    | Hematopoietic progenitor cell antigen CD34 OS=Homo sapiens GN=CD34 PE=1 SV=2 - [CD34_HUMAN]           | 1.00  | 1.00  | 0.43 | 0.15 |
| ▽ | ▽ | O43653                                                    | Prostate stem cell antigen OS=Homo sapiens GN=PSCA PE=1 SV=1 - [PSCA_HUMAN]                           | 1.00  | 1.00  | 0.06 | 0.15 |
| ▽ | ▽ | O15173                                                    | Membrane-associated progesterone receptor component 2 OS=Homo sapiens GN=PGRMC2 PE=1 SV=1 - [PGR      | 1.00  | 2.00  | 0.25 | 0.13 |
| ▽ | ▽ | Q9UBG3                                                    | Cornulin OS=Homo sapiens GN=CRNN PE=1 SV=1 - [CRNN_HUMAN]                                             | 4.00  | 4.00  | 0.12 | 0.13 |
| ▽ | ▽ | Q9H159                                                    | Cadherin-19 OS=Homo sapiens GN=CDH19 PE=2 SV=1 - [CAD19_HUMAN]                                        | 1.00  | 1.00  | 0.44 | 0.12 |
| ▽ | ▽ | O95460                                                    | Matrilin-4 OS=Homo sapiens GN=MATN4 PE=1 SV=3 - [MATN4_HUMAN]                                         | 2.00  | 2.00  | 0.20 | 0.11 |
| ▽ | ▽ | Q3L8U1                                                    | Chromodomain-helicase-DNA-binding protein 9 OS=Homo sapiens GN=CHD9 PE=1 SV=2 - [CHD9_HUMAN]          | 1.00  | 1.00  | 0.37 | 0.10 |
|   |   | <b>Down-Regulated Proteins in any one Subgroups (428)</b> |                                                                                                       |       |       |      |      |
| ▽ |   | P02792                                                    | Ferritin light chain OS=Homo sapiens GN=FTL PE=1 SV=2 - [FRIL_HUMAN]                                  | 7.00  | 7.00  | 0.43 | 1.68 |
| ▽ |   | P08779                                                    | Keratin, type I cytoskeletal 16 OS=Homo sapiens GN=KRT16 PE=1 SV=4 - [K1C16_HUMAN]                    | 2.00  | 8.00  | 0.38 | 1.61 |
| ▽ |   | Q93088                                                    | Betaine--homocysteine S-methyltransferase 1 OS=Homo sapiens GN=BHMT PE=1 SV=2 - [BHMT1_HUMAN]         | 10.00 | 13.00 | 0.43 | 1.48 |
| ▽ |   | O75891                                                    | 10-formyltetrahydrofolate dehydrogenase OS=Homo sapiens GN=ALDH1L1 PE=1 SV=2 - [FTHFD_HUMAN]          | 4.00  | 4.00  | 0.44 | 1.37 |
| ▽ |   | Q9UKL6                                                    | Phosphatidylcholine transfer protein OS=Homo sapiens GN=PCTP PE=1 SV=1 - [PPCT_HUMAN]                 | 1.00  | 1.00  | 0.48 | 1.35 |
| ▽ |   | P61925                                                    | cAMP-dependent protein kinase inhibitor alpha OS=Homo sapiens GN=PKIA PE=1 SV=2 - [IPKA_HUMAN]        | 1.00  | 1.00  | 0.42 | 1.30 |
| ▽ |   | P20711                                                    | Aromatic-L-amino-acid decarboxylase OS=Homo sapiens GN=DDC PE=1 SV=1 - [DDC_HUMAN]                    | 5.00  | 5.00  | 0.40 | 1.15 |
| ▽ |   | Q15020                                                    | Squamous cell carcinoma antigen recognized by T-cells 3 OS=Homo sapiens GN=SART3 PE=1 SV=1 - [SART    | 2.00  | 2.00  | 0.49 | 1.15 |
| ▽ |   | P19971                                                    | Thymidine phosphorylase OS=Homo sapiens GN=TYMP PE=1 SV=2 - [TYPH_HUMAN]                              | 2.00  | 2.00  | 0.29 | 1.15 |
| ▽ |   | P49368                                                    | T-complex protein 1 subunit gamma OS=Homo sapiens GN=CCT3 PE=1 SV=4 - [TCPG_HUMAN]                    | 1.00  | 1.00  | 0.49 | 0.97 |
| ▽ |   | Q14117                                                    | Dihydropyrimidinase OS=Homo sapiens GN=DPYS PE=1 SV=1 - [DPYS_HUMAN]                                  | 1.00  | 1.00  | 0.48 | 0.93 |
| ▽ |   | Q92597                                                    | Protein NDRG1 OS=Homo sapiens GN=NDRG1 PE=1 SV=1 - [NDRG1_HUMAN]                                      | 3.00  | 3.00  | 0.45 | 0.92 |
| ▽ |   | O75874                                                    | Isocitrate dehydrogenase [NADP] cytoplasmic OS=Homo sapiens GN=IDH1 PE=1 SV=2 - [IDHC_HUMAN]          | 14.00 | 14.00 | 0.44 | 0.77 |
| ▽ |   | P00352                                                    | Retinal dehydrogenase 1 OS=Homo sapiens GN=ALDH1A1 PE=1 SV=2 - [AL1A1_HUMAN]                          | 14.00 | 15.00 | 0.48 | 0.77 |
| ▽ |   | P35558                                                    | Phosphoenolpyruvate carboxykinase, cytosolic [GTP] OS=Homo sapiens GN=PCK1 PE=1 SV=3 - [PCKGC_H       | 3.00  | 3.00  | 0.47 | 0.71 |

|   |   |        |                                                                                                                       |       |       |      |      |
|---|---|--------|-----------------------------------------------------------------------------------------------------------------------|-------|-------|------|------|
| ▽ |   | A0AV96 | RNA-binding protein 47 OS=Homo sapiens GN=RBM47 PE=1 SV=1 - [RBM47_HUMAN]                                             | 1.00  | 1.00  | 0.49 | 0.70 |
| ▽ |   | Q8IZP2 | Putative protein FAM10A4 OS=Homo sapiens GN=FAM10A4 PE=5 SV=1 - [F10A4_HUMAN]                                         | 3.00  | 3.00  | 0.48 | 0.66 |
| ▽ |   | Q9H477 | Ribokinase OS=Homo sapiens GN=RBKS PE=1 SV=1 - [RBSK_HUMAN]                                                           | 2.00  | 2.00  | 0.45 | 0.66 |
| ▽ |   | P00568 | Adenylate kinase isoenzyme 1 OS=Homo sapiens GN=AK1 PE=1 SV=3 - [KAD1_HUMAN]                                          | 2.00  | 2.00  | 0.42 | 0.62 |
| ▽ |   | O75348 | V-type proton ATPase subunit G 1 OS=Homo sapiens GN=ATP6V1G1 PE=1 SV=3 - [VATG1_HUMAN]                                | 2.00  | 2.00  | 0.47 | 0.61 |
| ▽ |   | P54803 | Galactocerebrosidase OS=Homo sapiens GN=GALC PE=1 SV=2 - [GALC_HUMAN]                                                 | 2.00  | 2.00  | 0.47 | 0.59 |
| ▽ |   | Q96HF1 | Secreted frizzled-related protein 2 OS=Homo sapiens GN=SFRP2 PE=1 SV=2 - [SFRP2_HUMAN]                                | 1.00  | 1.00  | 0.49 | 0.58 |
| ▽ |   | Q96I24 | Far upstream element-binding protein 3 OS=Homo sapiens GN=FUBP3 PE=1 SV=2 - [FUBP3_HUMAN]                             | 1.00  | 1.00  | 0.41 | 0.58 |
| ▽ |   | Q9UK23 | N-acetylglucosamine-1-phosphodiester alpha-N-acetylglucosaminidase OS=Homo sapiens GN=NAGPA PE=2 SV=1 - [NAGPA_HUMAN] | 1.00  | 1.00  | 0.44 | 0.58 |
| ▽ |   | P05937 | Calbindin OS=Homo sapiens GN=CALB1 PE=1 SV=2 - [CALB1_HUMAN]                                                          | 7.00  | 7.00  | 0.42 | 0.58 |
| ▽ |   | Q9BZQ8 | Protein Niban OS=Homo sapiens GN=FAM129A PE=1 SV=1 - [NIBAN_HUMAN]                                                    | 1.00  | 1.00  | 0.43 | 0.56 |
| ▽ |   | Q00796 | Sorbitol dehydrogenase OS=Homo sapiens GN=SORD PE=1 SV=4 - [DHSO_HUMAN]                                               | 9.00  | 9.00  | 0.44 | 0.55 |
| ▽ |   | P35270 | Sepiapterin reductase OS=Homo sapiens GN=SPR PE=1 SV=1 - [SPRE_HUMAN]                                                 | 1.00  | 1.00  | 0.40 | 0.55 |
| ▽ |   | O43451 | Maltase-glucoamylase, intestinal OS=Homo sapiens GN=MGAM PE=1 SV=5 - [MGA_HUMAN]                                      | 32.00 | 33.00 | 0.50 | 0.54 |
| ▽ |   | P27348 | 14-3-3 protein theta OS=Homo sapiens GN=YWHAQ PE=1 SV=1 - [1433T_HUMAN]                                               | 1.00  | 4.00  | 0.45 | 0.54 |
| ▽ |   | Q8WW52 | Protein FAM151A OS=Homo sapiens GN=FAM151A PE=2 SV=2 - [F151A_HUMAN]                                                  | 4.00  | 4.00  | 0.32 | 0.53 |
| ▽ |   | O60294 | Leucine carboxyl methyltransferase 2 OS=Homo sapiens GN=LCMT2 PE=1 SV=3 - [LCMT2_HUMAN]                               | 1.00  | 1.00  | 0.43 | 0.52 |
| ▽ |   | Q9BWD1 | Acetyl-CoA acetyltransferase, cytosolic OS=Homo sapiens GN=ACAT2 PE=1 SV=2 - [THIC_HUMAN]                             | 1.00  | 1.00  | 0.46 | 0.52 |
| ▽ |   | Q9H6S3 | Epidermal growth factor receptor kinase substrate 8-like protein 2 OS=Homo sapiens GN=EPS8L2 PE=1 SV=2                | 6.00  | 6.00  | 0.47 | 0.52 |
| ▽ |   | P35908 | Keratin, type II cytoskeletal 2 epidermal OS=Homo sapiens GN=KRT2 PE=1 SV=2 - [K22E_HUMAN]                            | 10.00 | 15.00 | 0.37 | 0.50 |
| ▽ |   | P68402 | Platelet-activating factor acetylhydrolase IB subunit beta OS=Homo sapiens GN=PAFAH1B2 PE=1 SV=1 - [PAFAH1B2_HUMAN]   | 1.00  | 1.00  | 0.43 | 0.50 |
| ▽ |   | P19801 | Amiloride-sensitive amine oxidase [copper-containing] OS=Homo sapiens GN=ABP1 PE=1 SV=4 - [ABP1_HUMAN]                | 6.00  | 6.00  | 0.45 | 0.50 |
| ▽ |   | Q8N335 | Glycerol-3-phosphate dehydrogenase 1-like protein OS=Homo sapiens GN=GPD1L PE=1 SV=1 - [GPD1L_HUMAN]                  | 2.00  | 2.00  | 0.37 | 0.50 |
| ▽ |   | P16234 | Alpha-type platelet-derived growth factor receptor OS=Homo sapiens GN=PDGFRA PE=1 SV=1 - [PGFRA_HUMAN]                | 1.00  | 1.00  | 0.46 |      |
|   | ▽ | Q06418 | Tyrosine-protein kinase receptor TYRO3 OS=Homo sapiens GN=TYRO3 PE=1 SV=1 - [TYRO3_HUMAN]                             | 5.00  | 5.00  | 0.86 | 0.50 |
|   | ▽ | O75131 | Copine-3 OS=Homo sapiens GN=CPNE3 PE=1 SV=1 - [CPNE3_HUMAN]                                                           | 8.00  | 9.00  | 0.90 | 0.50 |
|   | ▽ | Q9BRK3 | Matrix-remodeling-associated protein 8 OS=Homo sapiens GN=MXRA8 PE=1 SV=1 - [MXRA8_HUMAN]                             | 7.00  | 7.00  | 1.03 | 0.50 |
|   | ▽ | P13598 | Intercellular adhesion molecule 2 OS=Homo sapiens GN=ICAM2 PE=1 SV=2 - [ICAM2_HUMAN]                                  | 4.00  | 4.00  | 1.15 | 0.50 |
|   | ▽ | Q9HBG4 | V-type proton ATPase 116 kDa subunit a isoform 4 OS=Homo sapiens GN=ATP6V0A4 PE=1 SV=1 - [VPP4_HUMAN]                 | 1.00  | 1.00  | 0.58 | 0.50 |
|   | ▽ | Q9H2A7 | C-X-C motif chemokine 16 OS=Homo sapiens GN=CXCL16 PE=2 SV=4 - [CXL16_HUMAN]                                          | 2.00  | 2.00  | 0.85 | 0.50 |
|   | ▽ | Q1EHB4 | Sodium-coupled monocarboxylate transporter 2 OS=Homo sapiens GN=SLC5A12 PE=2 SV=2 - [SC5AC_HUMAN]                     | 1.00  | 1.00  | 0.66 | 0.50 |
|   | ▽ | Q9BXP8 | Pappalysin-2 OS=Homo sapiens GN=PAPPA2 PE=1 SV=4 - [PAPP2_HUMAN]                                                      | 35.00 | 35.00 | 1.26 | 0.50 |
|   | ▽ | Q6W4X9 | Mucin-6 OS=Homo sapiens GN=MUC6 PE=1 SV=2 - [MUC6_HUMAN]                                                              | 2.00  | 2.00  | 0.98 | 0.50 |
|   | ▽ | Q96NY8 | Poliovirus receptor-related protein 4 OS=Homo sapiens GN=PVRL4 PE=1 SV=1 - [PVRL4_HUMAN]                              | 5.00  | 5.00  | 1.08 | 0.49 |
|   | ▽ | P25940 | Collagen alpha-3(V) chain OS=Homo sapiens GN=COL5A3 PE=1 SV=3 - [CO5A3_HUMAN]                                         | 5.00  | 5.00  | 0.85 | 0.49 |
|   | ▽ | Q9H3Z4 | DnaJ homolog subfamily C member 5 OS=Homo sapiens GN=DNAJC5 PE=1 SV=1 - [DNJC5_HUMAN]                                 | 1.00  | 1.00  | 0.72 | 0.49 |

|  |   |        |                                                                                                             |       |       |      |      |
|--|---|--------|-------------------------------------------------------------------------------------------------------------|-------|-------|------|------|
|  | ▽ | A6NGN9 | IgLON family member 5 OS=Homo sapiens GN=IGLON5 PE=2 SV=4 - [IGLO5_HUMAN]                                   | 2.00  | 2.00  | 1.07 | 0.49 |
|  | ▽ | P21266 | Glutathione S-transferase Mu 3 OS=Homo sapiens GN=GSTM3 PE=1 SV=3 - [GSTM3_HUMAN]                           | 11.00 | 11.00 | 0.60 | 0.49 |
|  | ▽ | Q16819 | Meprin A subunit alpha OS=Homo sapiens GN=MEP1A PE=2 SV=2 - [MEP1A_HUMAN]                                   | 4.00  | 4.00  | 1.02 | 0.49 |
|  | ▽ | Q9BRT3 | Uncharacterized protein C17orf37 OS=Homo sapiens GN=C17orf37 PE=2 SV=1 - [CQ037_HUMAN]                      | 3.00  | 3.00  | 0.75 | 0.49 |
|  | ▽ | P63000 | Ras-related C3 botulinum toxin substrate 1 OS=Homo sapiens GN=RAC1 PE=1 SV=1 - [RAC1_HUMAN]                 | 4.00  | 5.00  | 0.61 | 0.49 |
|  | ▽ | O60939 | Sodium channel subunit beta-2 OS=Homo sapiens GN=SCN2B PE=1 SV=1 - [SCN2B_HUMAN]                            | 1.00  | 1.00  | 1.58 | 0.49 |
|  | ▽ | P05090 | Apolipoprotein D OS=Homo sapiens GN=APOD PE=1 SV=1 - [APOD_HUMAN]                                           | 10.00 | 10.00 | 1.11 | 0.49 |
|  | ▽ | Q16827 | Receptor-type tyrosine-protein phosphatase O OS=Homo sapiens GN=PTPRO PE=1 SV=2 - [PTPRO_HUMAN]             | 1.00  | 1.00  | 0.86 | 0.49 |
|  | ▽ | P54753 | Ephrin type-B receptor 3 OS=Homo sapiens GN=EPHB3 PE=1 SV=2 - [EPHB3_HUMAN]                                 | 5.00  | 5.00  | 0.77 | 0.48 |
|  | ▽ | Q9NY97 | UDP-GlcNAc:betaGal beta-1,3-N-acetylglucosaminyltransferase 2 OS=Homo sapiens GN=B3GNT2 PE=1 SV=            | 5.00  | 5.00  | 0.82 | 0.48 |
|  | ▽ | P55285 | Cadherin-6 OS=Homo sapiens GN=CDH6 PE=1 SV=1 - [CADH6_HUMAN]                                                | 5.00  | 5.00  | 0.74 | 0.48 |
|  | ▽ | P41214 | Ligatin OS=Homo sapiens GN=LGTN PE=1 SV=3 - [LIGA_HUMAN]                                                    | 1.00  | 1.00  | 0.60 | 0.48 |
|  | ▽ | Q68D85 | Putative Ig-like domain-containing protein DKFZp686O24166/DKFZp686I21167 OS=Homo sapiens PE=2 SV=           | 3.00  | 3.00  | 0.69 | 0.48 |
|  | ▽ | Q13332 | Receptor-type tyrosine-protein phosphatase S OS=Homo sapiens GN=PTPRS PE=1 SV=2 - [PTPRS_HUMAN]             | 16.00 | 16.00 | 0.90 | 0.48 |
|  | ▽ | Q9H8L6 | Multimerin-2 OS=Homo sapiens GN=MMRN2 PE=1 SV=2 - [MMRN2_HUMAN]                                             | 6.00  | 6.00  | 0.65 | 0.48 |
|  | ▽ | P16401 | Histone H1.5 OS=Homo sapiens GN=HIST1H1B PE=1 SV=3 - [H15_HUMAN]                                            | 2.00  | 2.00  | 0.63 | 0.48 |
|  | ▽ | Q5D862 | Filaggrin-2 OS=Homo sapiens GN=FLG2 PE=1 SV=1 - [FILA2_HUMAN]                                               | 3.00  | 3.00  | 1.04 | 0.48 |
|  | ▽ | Q9BRG1 | Vacuolar protein-sorting-associated protein 25 OS=Homo sapiens GN=VPS25 PE=1 SV=1 - [VPS25_HUMAN]           | 2.00  | 2.00  | 0.77 | 0.48 |
|  | ▽ | Q9HCM3 | UPF0606 protein KIAA1549 OS=Homo sapiens GN=KIAA1549 PE=1 SV=3 - [K1549_HUMAN]                              | 2.00  | 2.00  | 0.83 | 0.48 |
|  | ▽ | P13645 | Keratin, type I cytoskeletal 10 OS=Homo sapiens GN=KRT10 PE=1 SV=6 - [K1C10_HUMAN]                          | 17.00 | 20.00 | 0.51 | 0.48 |
|  | ▽ | Q96RW7 | Hemicentin-1 OS=Homo sapiens GN=HMCN1 PE=1 SV=2 - [HMCN1_HUMAN]                                             | 8.00  | 8.00  | 0.82 | 0.48 |
|  | ▽ | O00144 | Frizzled-9 OS=Homo sapiens GN=FZD9 PE=2 SV=1 - [FZD9_HUMAN]                                                 | 1.00  | 1.00  | 0.88 | 0.48 |
|  | ▽ | Q92956 | Tumor necrosis factor receptor superfamily member 14 OS=Homo sapiens GN=TNFRSF14 PE=1 SV=3 - [TNR           | 4.00  | 4.00  | 1.01 | 0.48 |
|  | ▽ | P36957 | Dihydrolipoyllysine-residue succinyltransferase component of 2-oxoglutarate dehydrogenase complex, mitochon | 4.00  | 4.00  | 0.67 | 0.48 |
|  | ▽ | P07942 | Laminin subunit beta-1 OS=Homo sapiens GN=LAMB1 PE=1 SV=1 - [LAMB1_HUMAN]                                   | 6.00  | 7.00  | 0.96 | 0.48 |
|  | ▽ | Q6V017 | Protocadherin Fat 4 OS=Homo sapiens GN=FAT4 PE=2 SV=2 - [FAT4_HUMAN]                                        | 16.00 | 16.00 | 0.72 | 0.48 |
|  | ▽ | Q08334 | Interleukin-10 receptor subunit beta OS=Homo sapiens GN=IL10RB PE=1 SV=2 - [I10R2_HUMAN]                    | 2.00  | 2.00  | 1.00 | 0.47 |
|  | ▽ | Q96SL1 | Disrupted in renal carcinoma protein 2 OS=Homo sapiens GN=DIRC2 PE=2 SV=1 - [DIRC2_HUMAN]                   | 1.00  | 1.00  | 0.79 | 0.47 |
|  | ▽ | Q5VSG8 | Glycoprotein endo-alpha-1,2-mannosidase-like protein OS=Homo sapiens GN=MANEAL PE=2 SV=1 - [MANI            | 1.00  | 1.00  | 0.83 | 0.47 |
|  | ▽ | P02776 | Platelet factor 4 OS=Homo sapiens GN=PF4 PE=1 SV=2 - [PLF4_HUMAN]                                           | 2.00  | 2.00  | 0.98 | 0.47 |
|  | ▽ | O00322 | Uroplakin-1a OS=Homo sapiens GN=UPK1A PE=2 SV=1 - [UPK1A_HUMAN]                                             | 4.00  | 4.00  | 0.91 | 0.47 |
|  | ▽ | P69849 | Nodal modulator 3 OS=Homo sapiens GN=NOMO3 PE=2 SV=2 - [NOMO3_HUMAN]                                        | 1.00  | 1.00  | 0.90 | 0.47 |
|  | ▽ | O75339 | Cartilage intermediate layer protein 1 OS=Homo sapiens GN=CILP PE=1 SV=3 - [CILP1_HUMAN]                    | 2.00  | 2.00  | 0.65 | 0.47 |
|  | ▽ | Q9NY25 | C-type lectin domain family 5 member A OS=Homo sapiens GN=CLEC5A PE=1 SV=1 - [CLC5A_HUMAN]                  | 2.00  | 2.00  | 0.79 | 0.47 |
|  | ▽ | P31150 | Rab GDP dissociation inhibitor alpha OS=Homo sapiens GN=GDI1 PE=1 SV=2 - [GDIA_HUMAN]                       | 2.00  | 5.00  | 0.68 | 0.47 |
|  | ▽ | P07320 | Gamma-crystallin D OS=Homo sapiens GN=CRYGD PE=1 SV=3 - [CRGD_HUMAN]                                        | 1.00  | 1.00  | 0.65 | 0.47 |

|  |   |        |                                                                                                                                       |       |       |      |      |
|--|---|--------|---------------------------------------------------------------------------------------------------------------------------------------|-------|-------|------|------|
|  | ▽ | Q9UN37 | Vacuolar protein sorting-associated protein 4A OS=Homo sapiens GN=VPS4A PE=1 SV=1 - [VPS4A_HUMAN]                                     | 7.00  | 9.00  | 0.61 | 0.47 |
|  | ▽ | Q9H190 | Syntenin-2 OS=Homo sapiens GN=SDCBP2 PE=2 SV=2 - [SDCB2_HUMAN]                                                                        | 1.00  | 1.00  | 0.88 | 0.47 |
|  | ▽ | P61421 | V-type proton ATPase subunit d 1 OS=Homo sapiens GN=ATP6V0D1 PE=1 SV=1 - [VA0D1_HUMAN]                                                | 1.00  | 1.00  | 0.70 | 0.47 |
|  | ▽ | O43586 | Proline-serine-threonine phosphatase-interacting protein 1 OS=Homo sapiens GN=PSTPIP1 PE=1 SV=1 - [PIPF1_HUMAN]                       | 1.00  | 1.00  | 0.57 | 0.47 |
|  | ▽ | P36896 | Activin receptor type-1B OS=Homo sapiens GN=ACVR1B PE=1 SV=1 - [ACV1B_HUMAN]                                                          | 1.00  | 1.00  | 1.00 | 0.46 |
|  | ▽ | Q9GZX9 | Twisted gastrulation protein homolog 1 OS=Homo sapiens GN=TWSG1 PE=2 SV=1 - [TWSG1_HUMAN]                                             | 5.00  | 5.00  | 0.99 | 0.46 |
|  | ▽ | P34059 | N-acetylgalactosamine-6-sulfatase OS=Homo sapiens GN=GALNS PE=1 SV=1 - [GALNS_HUMAN]                                                  | 10.00 | 10.00 | 0.61 | 0.46 |
|  | ▽ | P60953 | Cell division control protein 42 homolog OS=Homo sapiens GN=CDC42 PE=1 SV=1 - [CDC42_HUMAN]                                           | 4.00  | 5.00  | 0.50 | 0.46 |
|  | ▽ | O60494 | Cubilin OS=Homo sapiens GN=CUBN PE=1 SV=4 - [CUBN_HUMAN]                                                                              | 63.00 | 63.00 | 0.68 | 0.46 |
|  | ▽ | P63092 | Guanine nucleotide-binding protein G(s) subunit alpha isoforms short OS=Homo sapiens GN=GNAS PE=1 SV=1 - [GNAS1_HUMAN]                | 6.00  | 6.00  | 0.65 | 0.46 |
|  | ▽ | Q13449 | Limbic system-associated membrane protein OS=Homo sapiens GN=LSAMP PE=1 SV=2 - [LSAMP_HUMAN]                                          | 3.00  | 3.00  | 0.70 | 0.46 |
|  | ▽ | Q15111 | Inactive phospholipase C-like protein 1 OS=Homo sapiens GN=PLCL1 PE=1 SV=3 - [PLCL1_HUMAN]                                            | 2.00  | 2.00  | 0.55 | 0.46 |
|  | ▽ | Q13162 | Peroxiredoxin-4 OS=Homo sapiens GN=PRDX4 PE=1 SV=1 - [PRDX4_HUMAN]                                                                    | 1.00  | 2.00  | 0.83 | 0.46 |
|  | ▽ | P53801 | Pituitary tumor-transforming gene 1 protein-interacting protein OS=Homo sapiens GN=PTTG1IP PE=1 SV=1 - [PTTG1IP_HUMAN]                | 2.00  | 2.00  | 0.76 | 0.46 |
|  | ▽ | O60888 | Protein CutA OS=Homo sapiens GN=CUTA PE=1 SV=2 - [CUTA_HUMAN]                                                                         | 6.00  | 6.00  | 0.67 | 0.46 |
|  | ▽ | Q9UJ99 | Cadherin-22 OS=Homo sapiens GN=CDH22 PE=2 SV=2 - [CAD22_HUMAN]                                                                        | 1.00  | 1.00  | 0.70 | 0.46 |
|  | ▽ | Q05707 | Collagen alpha-1(XIV) chain OS=Homo sapiens GN=COL14A1 PE=1 SV=3 - [COEA1_HUMAN]                                                      | 9.00  | 9.00  | 0.93 | 0.46 |
|  | ▽ | Q9UJ72 | Annexin A10 OS=Homo sapiens GN=ANXA10 PE=1 SV=3 - [ANX10_HUMAN]                                                                       | 1.00  | 1.00  | 1.43 | 0.46 |
|  | ▽ | Q8TB96 | T-cell immunomodulatory protein OS=Homo sapiens GN=ITFG1 PE=1 SV=1 - [TIP_HUMAN]                                                      | 4.00  | 4.00  | 0.69 | 0.46 |
|  | ▽ | Q96A22 | Uncharacterized protein C11orf52 OS=Homo sapiens GN=C11orf52 PE=1 SV=2 - [CK052_HUMAN]                                                | 1.00  | 1.00  | 0.72 | 0.46 |
|  | ▽ | Q8TDQ1 | CMRF35-like molecule 1 OS=Homo sapiens GN=CD300LF PE=1 SV=3 - [CLM1_HUMAN]                                                            | 2.00  | 2.00  | 0.82 | 0.46 |
|  | ▽ | P35241 | Radixin OS=Homo sapiens GN=RDX PE=1 SV=1 - [RADI_HUMAN]                                                                               | 3.00  | 8.00  | 0.69 | 0.46 |
|  | ▽ | P10253 | Lysosomal alpha-glucosidase OS=Homo sapiens GN=GAA PE=1 SV=3 - [LYAG_HUMAN]                                                           | 29.00 | 29.00 | 0.88 | 0.46 |
|  | ▽ | Q7Z7M0 | Multiple epidermal growth factor-like domains protein 8 OS=Homo sapiens GN=MEGF8 PE=1 SV=2 - [MEGF8_HUMAN]                            | 18.00 | 18.00 | 0.76 | 0.46 |
|  | ▽ | P09603 | Macrophage colony-stimulating factor 1 OS=Homo sapiens GN=CSF1 PE=1 SV=1 - [CSF1_HUMAN]                                               | 11.00 | 11.00 | 0.80 | 0.45 |
|  | ▽ | Q8IWU5 | Extracellular sulfatase Sulf-2 OS=Homo sapiens GN=SULF2 PE=1 SV=1 - [SULF2_HUMAN]                                                     | 3.00  | 3.00  | 0.79 | 0.45 |
|  | ▽ | Q9BUN1 | Uncharacterized protein C1orf56 OS=Homo sapiens GN=C1orf56 PE=1 SV=1 - [CA056_HUMAN]                                                  | 1.00  | 1.00  | 0.67 | 0.45 |
|  | ▽ | Q96QR1 | Secretoglobin family 3A member 1 OS=Homo sapiens GN=SCGB3A1 PE=1 SV=2 - [SG3A1_HUMAN]                                                 | 1.00  | 1.00  | 0.50 | 0.45 |
|  | ▽ | P0C7U0 | Extracellular leucine-rich repeat and fibronectin type-III domain-containing protein 1 OS=Homo sapiens GN=ELN PE=1 SV=1 - [ELN_HUMAN] | 1.00  | 1.00  | 0.93 | 0.45 |
|  | ▽ | P24821 | Tenascin OS=Homo sapiens GN=TNC PE=1 SV=3 - [TENA_HUMAN]                                                                              | 29.00 | 29.00 | 0.86 | 0.45 |
|  | ▽ | Q08345 | Epithelial discoidin domain-containing receptor 1 OS=Homo sapiens GN=DDR1 PE=1 SV=1 - [DDR1_HUMAN]                                    | 5.00  | 5.00  | 0.93 | 0.45 |
|  | ▽ | P62879 | Guanine nucleotide-binding protein G(I)/G(S)/G(T) subunit beta-2 OS=Homo sapiens GN=GNB2 PE=1 SV=3 - [GNB2_HUMAN]                     | 5.00  | 5.00  | 0.65 | 0.45 |
|  | ▽ | Q06481 | Amyloid-like protein 2 OS=Homo sapiens GN=APLP2 PE=1 SV=2 - [APLP2_HUMAN]                                                             | 12.00 | 12.00 | 0.65 | 0.45 |
|  | ▽ | P01130 | Low-density lipoprotein receptor OS=Homo sapiens GN=LDLR PE=1 SV=1 - [LDLR_HUMAN]                                                     | 2.00  | 2.00  | 1.16 | 0.45 |
|  | ▽ | A8MVW5 | HEPACAM family member 2 OS=Homo sapiens GN=HEPACAM2 PE=2 SV=1 - [HECA2_HUMAN]                                                         | 1.00  | 1.00  | 0.98 | 0.45 |
|  | ▽ | Q8TAB3 | Protocadherin-19 OS=Homo sapiens GN=PCDH19 PE=1 SV=3 - [PCD19_HUMAN]                                                                  | 2.00  | 2.00  | 0.73 | 0.45 |



|  |   |        |                                                                                                           |       |       |      |      |
|--|---|--------|-----------------------------------------------------------------------------------------------------------|-------|-------|------|------|
|  | ▽ | P32418 | Sodium/calcium exchanger 1 OS=Homo sapiens GN=SLC8A1 PE=1 SV=3 - [NAC1_HUMAN]                             | 3.00  | 3.00  | 0.65 | 0.45 |
|  | ▽ | O00526 | Uroplakin-2 OS=Homo sapiens GN=UPK2 PE=2 SV=2 - [UPK2_HUMAN]                                              | 4.00  | 4.00  | 0.78 | 0.44 |
|  | ▽ | P54289 | Voltage-dependent calcium channel subunit alpha-2/delta-1 OS=Homo sapiens GN=CACNA2D1 PE=1 SV=3 -         | 4.00  | 4.00  | 0.73 | 0.44 |
|  | ▽ | P08519 | Apolipoprotein(a) OS=Homo sapiens GN=LPA PE=1 SV=1 - [APOA_HUMAN]                                         | 5.00  | 5.00  | 0.98 | 0.44 |
|  | ▽ | P21802 | Fibroblast growth factor receptor 2 OS=Homo sapiens GN=FGFR2 PE=1 SV=1 - [FGFR2_HUMAN]                    | 4.00  | 4.00  | 0.71 | 0.44 |
|  | ▽ | P28827 | Receptor-type tyrosine-protein phosphatase mu OS=Homo sapiens GN=PTPRM PE=1 SV=2 - [PTPRM_HUMA]           | 1.00  | 1.00  | 0.76 | 0.44 |
|  | ▽ | Q9H461 | Frizzled-8 OS=Homo sapiens GN=FZD8 PE=2 SV=1 - [FZD8_HUMAN]                                               | 1.00  | 1.00  | 0.64 | 0.44 |
|  | ▽ | P22304 | Iduronate 2-sulfatase OS=Homo sapiens GN=IDS PE=1 SV=1 - [IDS_HUMAN]                                      | 6.00  | 6.00  | 0.67 | 0.44 |
|  | ▽ | P25189 | Myelin protein P0 OS=Homo sapiens GN=MPZ PE=1 SV=1 - [MYP0_HUMAN]                                         | 3.00  | 3.00  | 1.15 | 0.44 |
|  | ▽ | O00462 | Beta-mannosidase OS=Homo sapiens GN=MANBA PE=1 SV=3 - [MANBA_HUMAN]                                       | 17.00 | 17.00 | 0.78 | 0.44 |
|  | ▽ | P51688 | N-sulphoglucosamine sulphohydrolase OS=Homo sapiens GN=SGSH PE=1 SV=1 - [SPHM_HUMAN]                      | 9.00  | 9.00  | 0.51 | 0.44 |
|  | ▽ | Q9BY67 | Cell adhesion molecule 1 OS=Homo sapiens GN=CADM1 PE=1 SV=2 - [CADM1_HUMAN]                               | 10.00 | 10.00 | 0.69 | 0.44 |
|  | ▽ | P32004 | Neural cell adhesion molecule L1 OS=Homo sapiens GN=L1CAM PE=1 SV=2 - [L1CAM_HUMAN]                       | 11.00 | 11.00 | 0.81 | 0.44 |
|  | ▽ | O94910 | Latrophilin-1 OS=Homo sapiens GN=LPHN1 PE=1 SV=1 - [LPHN1_HUMAN]                                          | 7.00  | 7.00  | 0.85 | 0.44 |
|  | ▽ | P39059 | Collagen alpha-1(XV) chain OS=Homo sapiens GN=COL15A1 PE=1 SV=2 - [COFA1_HUMAN]                           | 13.00 | 13.00 | 0.79 | 0.44 |
|  | ▽ | Q9BXI6 | TBC1 domain family member 10A OS=Homo sapiens GN=TBC1D10A PE=1 SV=1 - [TB10A_HUMAN]                       | 1.00  | 1.00  | 0.51 | 0.43 |
|  | ▽ | Q9BQI6 | Ankyrin repeat domain-containing protein 32 OS=Homo sapiens GN=ANKRD32 PE=1 SV=2 - [ANR32_HUM]            | 1.00  | 1.00  | 0.76 | 0.43 |
|  | ▽ | P23284 | Peptidyl-prolyl cis-trans isomerase B OS=Homo sapiens GN=PPIB PE=1 SV=2 - [PIIB_HUMAN]                    | 5.00  | 5.00  | 0.51 | 0.43 |
|  | ▽ | P12259 | Coagulation factor V OS=Homo sapiens GN=F5 PE=1 SV=3 - [FA5_HUMAN]                                        | 4.00  | 4.00  | 0.76 | 0.43 |
|  | ▽ | P35555 | Fibrillin-1 OS=Homo sapiens GN=FBN1 PE=1 SV=2 - [FBN1_HUMAN]                                              | 38.00 | 38.00 | 0.89 | 0.43 |
|  | ▽ | O00182 | Galectin-9 OS=Homo sapiens GN=LGALS9 PE=1 SV=2 - [LEG9_HUMAN]                                             | 4.00  | 4.00  | 0.73 | 0.43 |
|  | ▽ | Q6EMK4 | Vasorin OS=Homo sapiens GN=VASN PE=1 SV=1 - [VASN_HUMAN]                                                  | 9.00  | 9.00  | 0.77 | 0.43 |
|  | ▽ | P53985 | Monocarboxylate transporter 1 OS=Homo sapiens GN=SLC16A1 PE=1 SV=2 - [MOT1_HUMAN]                         | 1.00  | 1.00  | 0.81 | 0.43 |
|  | ▽ | Q5SZK8 | FRAS1-related extracellular matrix protein 2 OS=Homo sapiens GN=FREM2 PE=1 SV=2 - [FREM2_HUMAN]           | 19.00 | 19.00 | 0.54 | 0.43 |
|  | ▽ | O43291 | Kunitz-type protease inhibitor 2 OS=Homo sapiens GN=SPINT2 PE=1 SV=2 - [SPIT2_HUMAN]                      | 3.00  | 3.00  | 0.88 | 0.43 |
|  | ▽ | Q6UWH4 | Protein FAM198B OS=Homo sapiens GN=FAM198B PE=2 SV=1 - [F198B_HUMAN]                                      | 1.00  | 1.00  | 0.76 | 0.43 |
|  | ▽ | Q9UNZ2 | NSFL1 cofactor p47 OS=Homo sapiens GN=NSFL1C PE=1 SV=2 - [NSF1C_HUMAN]                                    | 1.00  | 1.00  | 0.64 | 0.43 |
|  | ▽ | Q9Y240 | C-type lectin domain family 11 member A OS=Homo sapiens GN=CLEC11A PE=1 SV=1 - [CLC11_HUMAN]              | 1.00  | 1.00  | 0.77 | 0.43 |
|  | ▽ | Q15262 | Receptor-type tyrosine-protein phosphatase kappa OS=Homo sapiens GN=PTPRK PE=1 SV=2 - [PTPRK_HUM]         | 1.00  | 1.00  | 0.75 | 0.43 |
|  | ▽ | P61019 | Ras-related protein Rab-2A OS=Homo sapiens GN=RAB2A PE=1 SV=1 - [RAB2A_HUMAN]                             | 1.00  | 1.00  | 0.57 | 0.43 |
|  | ▽ | O15484 | Calpain-5 OS=Homo sapiens GN=CAPN5 PE=2 SV=2 - [CAN5_HUMAN]                                               | 2.00  | 2.00  | 0.69 | 0.42 |
|  | ▽ | Q96FE5 | Leucine-rich repeat and immunoglobulin-like domain-containing nogo receptor-interacting protein 1 OS=Homo | 1.00  | 1.00  | 0.88 | 0.42 |
|  | ▽ | P27105 | Erythrocyte band 7 integral membrane protein OS=Homo sapiens GN=STOM PE=1 SV=3 - [STOM_HUMAN]             | 9.00  | 9.00  | 0.56 | 0.42 |
|  | ▽ | P13987 | CD59 glycoprotein OS=Homo sapiens GN=CD59 PE=1 SV=1 - [CD59_HUMAN]                                        | 8.00  | 8.00  | 0.93 | 0.42 |
|  | ▽ | Q16832 | Discoidin domain-containing receptor 2 OS=Homo sapiens GN=DDR2 PE=1 SV=2 - [DDR2_HUMAN]                   | 4.00  | 4.00  | 0.93 | 0.42 |
|  | ▽ | Q13591 | Semaphorin-5A OS=Homo sapiens GN=SEMA5A PE=1 SV=3 - [SEM5A_HUMAN]                                         | 2.00  | 2.00  | 0.57 | 0.42 |



|  |   |        |                                                                                                                |       |       |      |      |
|--|---|--------|----------------------------------------------------------------------------------------------------------------|-------|-------|------|------|
|  | ▽ | Q9UF11 | Pleckstrin homology domain-containing family B member 1 OS=Homo sapiens GN=PLEKHB1 PE=1 SV=1 - [PLEKHB1_HUMAN] | 1.00  | 1.00  | 0.65 | 0.42 |
|  | ▽ | Q96JQ0 | Protocadherin-16 OS=Homo sapiens GN=DCHS1 PE=2 SV=1 - [PCD16_HUMAN]                                            | 6.00  | 6.00  | 0.81 | 0.42 |
|  | ▽ | Q8WV92 | MIT domain-containing protein 1 OS=Homo sapiens GN=MITD1 PE=1 SV=1 - [MITD1_HUMAN]                             | 2.00  | 2.00  | 0.67 | 0.42 |
|  | ▽ | Q9P2M7 | Cingulin OS=Homo sapiens GN=CGN PE=1 SV=2 - [CING_HUMAN]                                                       | 1.00  | 1.00  | 1.86 | 0.41 |
|  | ▽ | Q9NRA2 | Sialin OS=Homo sapiens GN=SLC17A5 PE=1 SV=2 - [S17A5_HUMAN]                                                    | 1.00  | 1.00  | 0.56 | 0.41 |
|  | ▽ | P07355 | Annexin A2 OS=Homo sapiens GN=ANXA2 PE=1 SV=2 - [ANXA2_HUMAN]                                                  | 12.00 | 12.00 | 0.63 | 0.41 |
|  | ▽ | Q13621 | Solute carrier family 12 member 1 OS=Homo sapiens GN=SLC12A1 PE=1 SV=2 - [S12A1_HUMAN]                         | 6.00  | 7.00  | 0.68 | 0.41 |
|  | ▽ | Q12794 | Hyaluronidase-1 OS=Homo sapiens GN=HYAL1 PE=1 SV=2 - [HYAL1_HUMAN]                                             | 7.00  | 7.00  | 0.52 | 0.41 |
|  | ▽ | Q99523 | Sortilin OS=Homo sapiens GN=SORT1 PE=1 SV=3 - [SORT_HUMAN]                                                     | 4.00  | 4.00  | 0.80 | 0.41 |
|  | ▽ | Q9H756 | Leucine-rich repeat-containing protein 19 OS=Homo sapiens GN=LRRC19 PE=2 SV=1 - [LRC19_HUMAN]                  | 2.00  | 2.00  | 0.81 | 0.41 |
|  | ▽ | P26718 | NKG2-D type II integral membrane protein OS=Homo sapiens GN=KLRK1 PE=1 SV=1 - [NKG2D_HUMAN]                    | 1.00  | 1.00  | 0.63 | 0.41 |
|  | ▽ | Q15746 | Myosin light chain kinase, smooth muscle OS=Homo sapiens GN=MYLK PE=1 SV=3 - [MYLK_HUMAN]                      | 2.00  | 2.00  | 0.53 | 0.41 |
|  | ▽ | P01589 | Interleukin-2 receptor subunit alpha OS=Homo sapiens GN=IL2RA PE=1 SV=1 - [IL2RA_HUMAN]                        | 3.00  | 3.00  | 1.16 | 0.41 |
|  | ▽ | Q9C0H2 | Protein tweety homolog 3 OS=Homo sapiens GN=TTYH3 PE=1 SV=3 - [TTYH3_HUMAN]                                    | 3.00  | 3.00  | 0.62 | 0.41 |
|  | ▽ | P19075 | Tetraspanin-8 OS=Homo sapiens GN=TSPAN8 PE=1 SV=1 - [TSN8_HUMAN]                                               | 2.00  | 2.00  | 0.69 | 0.41 |
|  | ▽ | P05067 | Amyloid beta A4 protein OS=Homo sapiens GN=APP PE=1 SV=3 - [A4_HUMAN]                                          | 10.00 | 10.00 | 0.67 | 0.41 |
|  | ▽ | Q16651 | Prostasin OS=Homo sapiens GN=PRSS8 PE=1 SV=1 - [PRSS8_HUMAN]                                                   | 3.00  | 3.00  | 0.87 | 0.41 |
|  | ▽ | O00560 | Syntenin-1 OS=Homo sapiens GN=SDCBP PE=1 SV=1 - [SDCB1_HUMAN]                                                  | 6.00  | 6.00  | 0.63 | 0.41 |
|  | ▽ | Q8NFBZ | Cell adhesion molecule 4 OS=Homo sapiens GN=CADM4 PE=1 SV=1 - [CADM4_HUMAN]                                    | 7.00  | 7.00  | 0.80 | 0.40 |
|  | ▽ | O75340 | Programmed cell death protein 6 OS=Homo sapiens GN=PDCD6 PE=1 SV=1 - [PDCD6_HUMAN]                             | 2.00  | 2.00  | 0.57 | 0.40 |
|  | ▽ | O43852 | Calumenin OS=Homo sapiens GN=CALU PE=1 SV=2 - [CALU_HUMAN]                                                     | 6.00  | 6.00  | 0.68 | 0.40 |
|  | ▽ | Q96J84 | Kin of IRRE-like protein 1 OS=Homo sapiens GN=KIRREL PE=1 SV=2 - [KIRR1_HUMAN]                                 | 7.00  | 7.00  | 0.79 | 0.40 |
|  | ▽ | Q5VY43 | Platelet endothelial aggregation receptor 1 OS=Homo sapiens GN=PEAR1 PE=1 SV=1 - [PEAR1_HUMAN]                 | 2.00  | 2.00  | 0.76 | 0.40 |
|  | ▽ | P11117 | Lysosomal acid phosphatase OS=Homo sapiens GN=ACP2 PE=1 SV=3 - [PPAL_HUMAN]                                    | 10.00 | 10.00 | 0.58 | 0.40 |
|  | ▽ | P08582 | Melanotransferrin OS=Homo sapiens GN=MF12 PE=1 SV=1 - [TRFM_HUMAN]                                             | 6.00  | 6.00  | 0.65 | 0.40 |
|  | ▽ | P61366 | Osteocrin OS=Homo sapiens GN=OSTN PE=2 SV=1 - [OSTN_HUMAN]                                                     | 1.00  | 1.00  | 1.16 | 0.40 |
|  | ▽ | P20916 | Myelin-associated glycoprotein OS=Homo sapiens GN=MAG PE=1 SV=1 - [MAG_HUMAN]                                  | 2.00  | 2.00  | 0.99 | 0.40 |
|  | ▽ | Q6UW56 | Apoptosis-related protein 3 OS=Homo sapiens GN=APR3 PE=1 SV=2 - [APR3_HUMAN]                                   | 1.00  | 1.00  | 1.05 | 0.40 |
|  | ▽ | Q6FHJ7 | Secreted frizzled-related protein 4 OS=Homo sapiens GN=SFRP4 PE=1 SV=2 - [SFRP4_HUMAN]                         | 3.00  | 3.00  | 0.72 | 0.40 |
|  | ▽ | Q8TDQ0 | Hepatitis A virus cellular receptor 2 OS=Homo sapiens GN=HAVCR2 PE=1 SV=2 - [TIMD3_HUMAN]                      | 3.00  | 3.00  | 0.92 | 0.40 |
|  | ▽ | Q8IWA5 | Choline transporter-like protein 2 OS=Homo sapiens GN=SLC44A2 PE=1 SV=2 - [CTL2_HUMAN]                         | 6.00  | 6.00  | 0.60 | 0.40 |
|  | ▽ | Q9UN70 | Protocadherin gamma-C3 OS=Homo sapiens GN=PCDHGC3 PE=1 SV=1 - [PCDGK_HUMAN]                                    | 7.00  | 7.00  | 0.73 | 0.40 |
|  | ▽ | P09525 | Annexin A4 OS=Homo sapiens GN=ANXA4 PE=1 SV=4 - [ANXA4_HUMAN]                                                  | 10.00 | 10.00 | 0.64 | 0.40 |
|  | ▽ | Q96GW7 | Brevican core protein OS=Homo sapiens GN=BCAN PE=1 SV=2 - [PGCB_HUMAN]                                         | 2.00  | 2.00  | 0.88 | 0.39 |
|  | ▽ | Q9Y4C0 | Neurexin-3-alpha OS=Homo sapiens GN=NRXN3 PE=2 SV=4 - [NRX3A_HUMAN]                                            | 3.00  | 3.00  | 1.00 | 0.39 |
|  | ▽ | Q96FZ7 | Charged multivesicular body protein 6 OS=Homo sapiens GN=CHMP6 PE=1 SV=3 - [CHMP6_HUMAN]                       | 1.00  | 1.00  | 0.53 | 0.39 |

|  |   |        |                                                                                                            |       |       |      |      |
|--|---|--------|------------------------------------------------------------------------------------------------------------|-------|-------|------|------|
|  | ▽ | O60896 | Receptor activity-modifying protein 3 OS=Homo sapiens GN=RAMP3 PE=2 SV=1 - [RAMP3_HUMAN]                   | 1.00  | 1.00  | 0.53 | 0.39 |
|  | ▽ | P11234 | Ras-related protein Ral-B OS=Homo sapiens GN=RALB PE=1 SV=1 - [RALB_HUMAN]                                 | 3.00  | 3.00  | 0.68 | 0.39 |
|  | ▽ | Q8NFI5 | Retinoic acid-induced protein 3 OS=Homo sapiens GN=GPRC5A PE=1 SV=2 - [RAI3_HUMAN]                         | 2.00  | 2.00  | 0.57 | 0.39 |
|  | ▽ | Q8IZF2 | Probable G-protein coupled receptor 116 OS=Homo sapiens GN=GPR116 PE=1 SV=3 - [GP116_HUMAN]                | 6.00  | 6.00  | 0.58 | 0.39 |
|  | ▽ | P55107 | Bone morphogenetic protein 3B OS=Homo sapiens GN=GDF10 PE=1 SV=1 - [BMP3B_HUMAN]                           | 1.00  | 1.00  | 0.58 | 0.39 |
|  | ▽ | P02462 | Collagen alpha-1(IV) chain OS=Homo sapiens GN=COL4A1 PE=1 SV=3 - [CO4A1_HUMAN]                             | 1.00  | 1.00  | 0.57 | 0.39 |
|  | ▽ | Q8N3J6 | Cell adhesion molecule 2 OS=Homo sapiens GN=CADM2 PE=2 SV=1 - [CADM2_HUMAN]                                | 4.00  | 4.00  | 0.88 | 0.39 |
|  | ▽ | P14384 | Carboxypeptidase M OS=Homo sapiens GN=CPM PE=1 SV=2 - [CBPM_HUMAN]                                         | 12.00 | 12.00 | 0.75 | 0.39 |
|  | ▽ | Q99715 | Collagen alpha-1(XII) chain OS=Homo sapiens GN=COL12A1 PE=1 SV=2 - [COCA1_HUMAN]                           | 25.00 | 25.00 | 0.72 | 0.39 |
|  | ▽ | Q9UPR5 | Sodium/calcium exchanger 2 OS=Homo sapiens GN=SLC8A2 PE=2 SV=2 - [NAC2_HUMAN]                              | 2.00  | 2.00  | 0.91 | 0.39 |
|  | ▽ | P61586 | Transforming protein RhoA OS=Homo sapiens GN=RHOA PE=1 SV=1 - [RHOA_HUMAN]                                 | 6.00  | 6.00  | 0.56 | 0.39 |
|  | ▽ | Q9UBX7 | Kallikrein-11 OS=Homo sapiens GN=KLK11 PE=1 SV=2 - [KLK11_HUMAN]                                           | 7.00  | 7.00  | 0.86 | 0.39 |
|  | ▽ | P35968 | Vascular endothelial growth factor receptor 2 OS=Homo sapiens GN=KDR PE=1 SV=2 - [VGFR2_HUMAN]             | 1.00  | 1.00  | 1.27 | 0.39 |
|  | ▽ | Q15375 | Ephrin type-A receptor 7 OS=Homo sapiens GN=EPHA7 PE=1 SV=3 - [EPHA7_HUMAN]                                | 7.00  | 7.00  | 0.81 | 0.39 |
|  | ▽ | Q13477 | Mucosal addressin cell adhesion molecule 1 OS=Homo sapiens GN=MADCAM1 PE=1 SV=2 - [MADCA_HUMAN]            | 5.00  | 5.00  | 0.68 | 0.39 |
|  | ▽ | P16870 | Carboxypeptidase E OS=Homo sapiens GN=CPE PE=1 SV=1 - [CBPE_HUMAN]                                         | 18.00 | 18.00 | 0.63 | 0.38 |
|  | ▽ | O75074 | Low-density lipoprotein receptor-related protein 3 OS=Homo sapiens GN=LRP3 PE=2 SV=2 - [LRP3_HUMAN]        | 1.00  | 1.00  | 0.97 | 0.38 |
|  | ▽ | A8K714 | Calcium-activated chloride channel regulator 1 OS=Homo sapiens GN=CLCA1 PE=1 SV=2 - [CLCA1_HUMAN]          | 1.00  | 1.00  | 0.77 | 0.38 |
|  | ▽ | Q12860 | Contactin-1 OS=Homo sapiens GN=CNTN1 PE=1 SV=1 - [CNTN1_HUMAN]                                             | 19.00 | 19.00 | 0.67 | 0.38 |
|  | ▽ | P54710 | Sodium/potassium-transporting ATPase subunit gamma OS=Homo sapiens GN=FXSD2 PE=1 SV=3 - [ATNG_HUMAN]       | 1.00  | 1.00  | 1.20 | 0.38 |
|  | ▽ | P17342 | Atrial natriuretic peptide receptor 3 OS=Homo sapiens GN=NPR3 PE=1 SV=2 - [ANPRC_HUMAN]                    | 2.00  | 2.00  | 0.61 | 0.38 |
|  | ▽ | P08294 | Extracellular superoxide dismutase [Cu-Zn] OS=Homo sapiens GN=SOD3 PE=1 SV=2 - [SODE_HUMAN]                | 9.00  | 9.00  | 0.66 | 0.38 |
|  | ▽ | O94991 | SLIT and NTRK-like protein 5 OS=Homo sapiens GN=SLITRK5 PE=1 SV=2 - [SLIK5_HUMAN]                          | 2.00  | 2.00  | 0.74 | 0.38 |
|  | ▽ | P11047 | Laminin subunit gamma-1 OS=Homo sapiens GN=LAMC1 PE=1 SV=3 - [LAMC1_HUMAN]                                 | 8.00  | 8.00  | 0.85 | 0.38 |
|  | ▽ | Q9HCN6 | Platelet glycoprotein VI OS=Homo sapiens GN=GP6 PE=1 SV=2 - [GPVI_HUMAN]                                   | 6.00  | 6.00  | 1.01 | 0.38 |
|  | ▽ | P23468 | Receptor-type tyrosine-protein phosphatase delta OS=Homo sapiens GN=PTPRD PE=1 SV=2 - [PTPRD_HUMAN]        | 2.00  | 2.00  | 0.69 | 0.38 |
|  | ▽ | Q96DA0 | Zymogen granule protein 16 homolog B OS=Homo sapiens GN=ZG16B PE=1 SV=3 - [ZG16B_HUMAN]                    | 6.00  | 6.00  | 0.97 | 0.38 |
|  | ▽ | P08174 | Complement decay-accelerating factor OS=Homo sapiens GN=CD55 PE=1 SV=4 - [DAF_HUMAN]                       | 13.00 | 13.00 | 1.25 | 0.38 |
|  | ▽ | O75631 | Uroplakin-3a OS=Homo sapiens GN=UPK3A PE=1 SV=3 - [UPK3A_HUMAN]                                            | 2.00  | 2.00  | 0.92 | 0.38 |
|  | ▽ | Q13291 | Signaling lymphocytic activation molecule OS=Homo sapiens GN=SLAMF1 PE=1 SV=1 - [SLAF1_HUMAN]              | 1.00  | 1.00  | 0.92 | 0.38 |
|  | ▽ | P04899 | Guanine nucleotide-binding protein G(i) subunit alpha-2 OS=Homo sapiens GN=GNAI2 PE=1 SV=3 - [GNAI2_HUMAN] | 4.00  | 5.00  | 0.68 | 0.38 |
|  | ▽ | P07476 | Involucrin OS=Homo sapiens GN=IVL PE=1 SV=2 - [INVO_HUMAN]                                                 | 3.00  | 3.00  | 0.54 | 0.38 |
|  | ▽ | P15151 | Poliovirus receptor OS=Homo sapiens GN=PVR PE=1 SV=2 - [PVR_HUMAN]                                         | 3.00  | 3.00  | 0.96 | 0.38 |
|  | ▽ | O43490 | Prominin-1 OS=Homo sapiens GN=PROM1 PE=1 SV=1 - [PROM1_HUMAN]                                              | 18.00 | 18.00 | 0.85 | 0.38 |
|  | ▽ | O00533 | Neural cell adhesion molecule L1-like protein OS=Homo sapiens GN=CHL1 PE=1 SV=3 - [CHL1_HUMAN]             | 18.00 | 18.00 | 0.87 | 0.38 |
|  | ▽ | Q99608 | Necdin OS=Homo sapiens GN=NDN PE=1 SV=1 - [NECD_HUMAN]                                                     | 1.00  | 1.00  | 0.57 | 0.37 |

|  |   |        |                                                                                                           |       |       |      |      |
|--|---|--------|-----------------------------------------------------------------------------------------------------------|-------|-------|------|------|
|  | ▽ | P01215 | Glycoprotein hormones alpha chain OS=Homo sapiens GN=CGA PE=1 SV=1 - [GLHA_HUMAN]                         | 1.00  | 1.00  | 0.92 | 0.37 |
|  | ▽ | Q92896 | Golgi apparatus protein 1 OS=Homo sapiens GN=GLG1 PE=1 SV=2 - [GSLG1_HUMAN]                               | 16.00 | 16.00 | 0.70 | 0.37 |
|  | ▽ | Q6UXB3 | Ly6/PLAUR domain-containing protein 2 OS=Homo sapiens GN=LYPD2 PE=2 SV=1 - [LYPD2_HUMAN]                  | 1.00  | 1.00  | 0.76 | 0.37 |
|  | ▽ | O75351 | Vacuolar protein sorting-associated protein 4B OS=Homo sapiens GN=VPS4B PE=1 SV=2 - [VPS4B_HUMAN]         | 4.00  | 6.00  | 0.61 | 0.37 |
|  | ▽ | P98155 | Very low-density lipoprotein receptor OS=Homo sapiens GN=VLDLR PE=1 SV=1 - [VLDLR_HUMAN]                  | 1.00  | 1.00  | 0.59 | 0.37 |
|  | ▽ | O94856 | Neurofascin OS=Homo sapiens GN=NFASC PE=1 SV=4 - [NFASC_HUMAN]                                            | 1.00  | 1.00  | 0.70 | 0.37 |
|  | ▽ | P01258 | Calcitonin OS=Homo sapiens GN=CALCA PE=1 SV=1 - [CALC_HUMAN]                                              | 3.00  | 3.00  | 0.70 | 0.37 |
|  | ▽ | P04180 | Phosphatidylcholine-sterol acyltransferase OS=Homo sapiens GN=LCAT PE=1 SV=1 - [LCAT_HUMAN]               | 7.00  | 7.00  | 0.78 | 0.37 |
|  | ▽ | Q92673 | Sortilin-related receptor OS=Homo sapiens GN=SORL1 PE=1 SV=2 - [SORL_HUMAN]                               | 16.00 | 16.00 | 0.69 | 0.37 |
|  | ▽ | O95998 | Interleukin-18-binding protein OS=Homo sapiens GN=IL18BP PE=1 SV=2 - [I18BP_HUMAN]                        | 4.00  | 4.00  | 0.99 | 0.37 |
|  | ▽ | Q9Y6W3 | Calpain-7 OS=Homo sapiens GN=CAPN7 PE=1 SV=1 - [CAN7_HUMAN]                                               | 10.00 | 10.00 | 0.58 | 0.37 |
|  | ▽ | Q12913 | Receptor-type tyrosine-protein phosphatase eta OS=Homo sapiens GN=PTPRJ PE=1 SV=3 - [PTPRJ_HUMAN]         | 11.00 | 11.00 | 0.59 | 0.37 |
|  | ▽ | Q86SR0 | Secreted Ly-6/uPAR-related protein 2 OS=Homo sapiens GN=SLURP2 PE=2 SV=1 - [SLUR2_HUMAN]                  | 2.00  | 2.00  | 0.56 | 0.37 |
|  | ▽ | Q08722 | Leukocyte surface antigen CD47 OS=Homo sapiens GN=CD47 PE=1 SV=1 - [CD47_HUMAN]                           | 1.00  | 1.00  | 0.93 | 0.37 |
|  | ▽ | O00592 | Podocalyxin-like protein 1 OS=Homo sapiens GN=PODXL PE=1 SV=2 - [PODXL_HUMAN]                             | 4.00  | 4.00  | 0.59 | 0.37 |
|  | ▽ | Q96EY5 | Multivesicular body subunit 12A OS=Homo sapiens GN=FAM125A PE=1 SV=1 - [F125A_HUMAN]                      | 3.00  | 3.00  | 0.63 | 0.37 |
|  | ▽ | Q8N6Q3 | CD177 antigen OS=Homo sapiens GN=CD177 PE=1 SV=2 - [CD177_HUMAN]                                          | 6.00  | 6.00  | 0.90 | 0.37 |
|  | ▽ | P78324 | Tyrosine-protein phosphatase non-receptor type substrate 1 OS=Homo sapiens GN=SIRPA PE=1 SV=1 - [SHPS     | 6.00  | 11.00 | 0.90 | 0.37 |
|  | ▽ | Q9NNX6 | CD209 antigen OS=Homo sapiens GN=CD209 PE=1 SV=1 - [CD209_HUMAN]                                          | 2.00  | 2.00  | 0.90 | 0.37 |
|  | ▽ | Q96FQ6 | Protein S100-A16 OS=Homo sapiens GN=S100A16 PE=1 SV=1 - [S10AG_HUMAN]                                     | 2.00  | 2.00  | 0.55 | 0.37 |
|  | ▽ | Q96FE7 | Phosphoinositide-3-kinase-interacting protein 1 OS=Homo sapiens GN=PIK3IP1 PE=1 SV=2 - [P3IP1_HUMAN]      | 3.00  | 3.00  | 0.81 | 0.37 |
|  | ▽ | O75882 | Attractin OS=Homo sapiens GN=ATRIN PE=1 SV=2 - [ATRIN_HUMAN]                                              | 20.00 | 20.00 | 0.86 | 0.37 |
|  | ▽ | Q8N386 | Leucine-rich repeat-containing protein 25 OS=Homo sapiens GN=LRRC25 PE=2 SV=2 - [LRC25_HUMAN]             | 2.00  | 2.00  | 0.72 | 0.37 |
|  | ▽ | Q8N271 | Prominin-2 OS=Homo sapiens GN=PROM2 PE=1 SV=1 - [PROM2_HUMAN]                                             | 7.00  | 7.00  | 0.64 | 0.37 |
|  | ▽ | Q8N9B8 | Ras-GEF domain-containing family member 1A OS=Homo sapiens GN=RASGEF1A PE=2 SV=2 - [RGF1A_H               | 1.00  | 1.00  | 0.73 | 0.37 |
|  | ▽ | Q5JXA9 | Signal-regulatory protein beta-2 OS=Homo sapiens GN=SIRPB2 PE=2 SV=1 - [SIRB2_HUMAN]                      | 2.00  | 2.00  | 1.22 | 0.37 |
|  | ▽ | O75019 | Leukocyte immunoglobulin-like receptor subfamily A member 1 OS=Homo sapiens GN=LILRA1 PE=2 SV=1 -         | 1.00  | 2.00  | 0.63 | 0.37 |
|  | ▽ | Q9UM47 | Neurogenic locus notch homolog protein 3 OS=Homo sapiens GN=NOTCH3 PE=1 SV=1 - [NOTC3_HUMAN]              | 2.00  | 2.00  | 0.67 | 0.37 |
|  | ▽ | Q9UNA0 | A disintegrin and metalloproteinase with thrombospondin motifs 5 OS=Homo sapiens GN=ADAMTS5 PE=1 SV       | 1.00  | 1.00  | 0.73 | 0.36 |
|  | ▽ | P09619 | Beta-type platelet-derived growth factor receptor OS=Homo sapiens GN=PDGFRB PE=1 SV=1 - [PGFRB_HU         | 4.00  | 4.00  | 0.84 | 0.36 |
|  | ▽ | P20062 | Transcobalamin-2 OS=Homo sapiens GN=TCN2 PE=1 SV=3 - [TCO2_HUMAN]                                         | 5.00  | 5.00  | 0.71 | 0.36 |
|  | ▽ | O00241 | Signal-regulatory protein beta-1 OS=Homo sapiens GN=SIRPB1 PE=1 SV=4 - [SIRB1_HUMAN]                      | 11.00 | 12.00 | 0.84 | 0.36 |
|  | ▽ | Q01973 | Tyrosine-protein kinase transmembrane receptor ROR1 OS=Homo sapiens GN=ROR1 PE=2 SV=2 - [ROR1_HU          | 4.00  | 5.00  | 1.05 | 0.36 |
|  | ▽ | Q9UHR4 | Brain-specific angiogenesis inhibitor 1-associated protein 2-like protein 1 OS=Homo sapiens GN=BAIAP2L1 P | 5.00  | 5.00  | 0.89 | 0.36 |
|  | ▽ | Q8WVQ1 | Soluble calcium-activated nucleotidase 1 OS=Homo sapiens GN=CANT1 PE=1 SV=1 - [CANT1_HUMAN]               | 4.00  | 4.00  | 0.60 | 0.36 |
|  | ▽ | Q8WWV6 | High affinity immunoglobulin alpha and immunoglobulin mu Fc receptor OS=Homo sapiens GN=FCAMR PE=         | 3.00  | 3.00  | 0.88 | 0.36 |

|  |   |        |                                                                                                     |       |       |      |      |
|--|---|--------|-----------------------------------------------------------------------------------------------------|-------|-------|------|------|
|  | ▽ | Q96P63 | Serpin B12 OS=Homo sapiens GN=SERPINB12 PE=1 SV=1 - [SPB12_HUMAN]                                   | 2.00  | 2.00  | 1.21 | 0.36 |
|  | ▽ | Q9Y287 | Integral membrane protein 2B OS=Homo sapiens GN=ITM2B PE=1 SV=1 - [ITM2B_HUMAN]                     | 3.00  | 3.00  | 0.50 | 0.36 |
|  | ▽ | P08183 | Multidrug resistance protein 1 OS=Homo sapiens GN=ABCB1 PE=1 SV=3 - [MDR1_HUMAN]                    | 5.00  | 5.00  | 0.51 | 0.36 |
|  | ▽ | P12830 | Cadherin-1 OS=Homo sapiens GN=CDH1 PE=1 SV=3 - [CADH1_HUMAN]                                        | 19.00 | 20.00 | 1.03 | 0.36 |
|  | ▽ | P50995 | Annexin A11 OS=Homo sapiens GN=ANXA11 PE=1 SV=1 - [ANX11_HUMAN]                                     | 14.00 | 14.00 | 0.62 | 0.36 |
|  | ▽ | P01210 | Proenkephalin-A OS=Homo sapiens GN=PENK PE=1 SV=1 - [PENK_HUMAN]                                    | 2.00  | 2.00  | 0.89 | 0.36 |
|  | ▽ | Q68CJ9 | Cyclic AMP-responsive element-binding protein 3-like protein 3 OS=Homo sapiens GN=CREB3L3 PE=1 SV=2 | 3.00  | 3.00  | 0.67 | 0.36 |
|  | ▽ | A6NL88 | Protein shisa-7 OS=Homo sapiens GN=SHISA7 PE=2 SV=3 - [SHSA7_HUMAN]                                 | 1.00  | 1.00  | 0.86 | 0.35 |
|  | ▽ | Q8NDC0 | MAPK-interacting and spindle-stabilizing protein-like OS=Homo sapiens GN=MAPK1IP1L PE=1 SV=4 - [MIS | 1.00  | 1.00  | 0.76 | 0.35 |
|  | ▽ | Q9GZM5 | Protein YIPF3 OS=Homo sapiens GN=YIPF3 PE=1 SV=1 - [YIPF3_HUMAN]                                    | 2.00  | 2.00  | 0.77 | 0.35 |
|  | ▽ | Q8TCZ2 | CD99 antigen-like protein 2 OS=Homo sapiens GN=CD99L2 PE=2 SV=1 - [C99L2_HUMAN]                     | 3.00  | 3.00  | 0.71 | 0.35 |
|  | ▽ | Q8N307 | Mucin-20 OS=Homo sapiens GN=MUC20 PE=1 SV=2 - [MUC20_HUMAN]                                         | 4.00  | 4.00  | 0.64 | 0.35 |
|  | ▽ | Q9UQV4 | Lysosome-associated membrane glycoprotein 3 OS=Homo sapiens GN=LAMP3 PE=1 SV=3 - [LAMP3_HUMA        | 3.00  | 3.00  | 0.73 | 0.35 |
|  | ▽ | P62330 | ADP-ribosylation factor 6 OS=Homo sapiens GN=ARF6 PE=1 SV=2 - [ARF6_HUMAN]                          | 2.00  | 2.00  | 0.84 | 0.35 |
|  | ▽ | O95297 | Myelin protein zero-like protein 1 OS=Homo sapiens GN=MPZL1 PE=1 SV=1 - [MPZL1_HUMAN]               | 2.00  | 2.00  | 0.71 | 0.35 |
|  | ▽ | P14138 | Endothelin-3 OS=Homo sapiens GN=EDN3 PE=1 SV=1 - [EDN3_HUMAN]                                       | 1.00  | 1.00  | 0.74 | 0.35 |
|  | ▽ | P16112 | Aggrecan core protein OS=Homo sapiens GN=ACAN PE=1 SV=2 - [PGCA_HUMAN]                              | 4.00  | 4.00  | 0.70 | 0.35 |
|  | ▽ | Q8WUT4 | Leucine-rich repeat neuronal protein 4 OS=Homo sapiens GN=LRRN4 PE=1 SV=3 - [LRRN4_HUMAN]           | 1.00  | 1.00  | 0.82 | 0.35 |
|  | ▽ | Q14393 | Growth arrest-specific protein 6 OS=Homo sapiens GN=GAS6 PE=1 SV=2 - [GAS6_HUMAN]                   | 3.00  | 3.00  | 0.55 | 0.35 |
|  | ▽ | P35443 | Thrombospondin-4 OS=Homo sapiens GN=THBS4 PE=1 SV=2 - [TSP4_HUMAN]                                  | 11.00 | 11.00 | 0.74 | 0.34 |
|  | ▽ | P84095 | Rho-related GTP-binding protein RhoG OS=Homo sapiens GN=RHOG PE=1 SV=1 - [RHOG_HUMAN]               | 1.00  | 2.00  | 0.55 | 0.34 |
|  | ▽ | P19022 | Cadherin-2 OS=Homo sapiens GN=CDH2 PE=1 SV=4 - [CADH2_HUMAN]                                        | 16.00 | 16.00 | 0.81 | 0.34 |
|  | ▽ | Q12864 | Cadherin-17 OS=Homo sapiens GN=CDH17 PE=1 SV=2 - [CAD17_HUMAN]                                      | 3.00  | 3.00  | 0.74 | 0.34 |
|  | ▽ | P61026 | Ras-related protein Rab-10 OS=Homo sapiens GN=RAB10 PE=1 SV=1 - [RAB10_HUMAN]                       | 4.00  | 4.00  | 0.52 | 0.34 |
|  | ▽ | Q16849 | Receptor-type tyrosine-protein phosphatase-like N OS=Homo sapiens GN=PTPRN PE=1 SV=1 - [PTPRN_HUM   | 5.00  | 5.00  | 0.59 | 0.34 |
|  | ▽ | P29508 | Serpin B3 OS=Homo sapiens GN=SERPINB3 PE=1 SV=2 - [SPB3_HUMAN]                                      | 4.00  | 8.00  | 1.20 | 0.34 |
|  | ▽ | Q9UBX1 | Cathepsin F OS=Homo sapiens GN=CTSF PE=1 SV=1 - [CATF_HUMAN]                                        | 2.00  | 2.00  | 0.74 | 0.34 |
|  | ▽ | Q9BYE9 | Cadherin-related family member 2 OS=Homo sapiens GN=CDHR2 PE=1 SV=2 - [CDHR2_HUMAN]                 | 17.00 | 17.00 | 0.64 | 0.34 |
|  | ▽ | Q9BXN2 | C-type lectin domain family 7 member A OS=Homo sapiens GN=CLEC7A PE=1 SV=1 - [CLC7A_HUMAN]          | 2.00  | 2.00  | 0.60 | 0.34 |
|  | ▽ | Q9NY26 | Zinc transporter ZIP1 OS=Homo sapiens GN=SLC39A1 PE=1 SV=1 - [S39A1_HUMAN]                          | 1.00  | 1.00  | 0.64 | 0.34 |
|  | ▽ | P24530 | Endothelin B receptor OS=Homo sapiens GN=EDNRB PE=1 SV=1 - [EDNRB_HUMAN]                            | 1.00  | 1.00  | 0.75 | 0.33 |
|  | ▽ | P98164 | Low-density lipoprotein receptor-related protein 2 OS=Homo sapiens GN=LRP2 PE=1 SV=3 - [LRP2_HUMAN] | 75.00 | 75.00 | 0.66 | 0.33 |
|  | ▽ | Q8WVV5 | Butyrophilin subfamily 2 member A2 OS=Homo sapiens GN=BTN2A2 PE=2 SV=2 - [BT2A2_HUMAN]              | 5.00  | 5.00  | 0.79 | 0.33 |
|  | ▽ | P04745 | Alpha-amylase 1 OS=Homo sapiens GN=AMY1A PE=1 SV=2 - [AMY1_HUMAN]                                   | 1.00  | 20.00 | 0.56 | 0.33 |
|  | ▽ | Q16769 | Glutaminy-peptide cyclotransferase OS=Homo sapiens GN=QPCT PE=1 SV=1 - [QPCT_HUMAN]                 | 11.00 | 11.00 | 0.79 | 0.33 |
|  | ▽ | Q8WUM4 | Programmed cell death 6-interacting protein OS=Homo sapiens GN=PDCD6IP PE=1 SV=1 - [PDC6I_HUMAN]    | 15.00 | 15.00 | 0.56 | 0.33 |

|  |   |        |                                                                                                                       |       |       |      |      |
|--|---|--------|-----------------------------------------------------------------------------------------------------------------------|-------|-------|------|------|
|  | ▽ | P13611 | Versican core protein OS=Homo sapiens GN=VCAN PE=1 SV=3 - [CSPG2_HUMAN]                                               | 8.00  | 8.00  | 0.72 | 0.33 |
|  | ▽ | P01229 | Lutropin subunit beta OS=Homo sapiens GN=LHB PE=1 SV=3 - [LSHB_HUMAN]                                                 | 1.00  | 1.00  | 0.55 | 0.33 |
|  | ▽ | Q8TBP5 | Membrane protein FAM174A OS=Homo sapiens GN=FAM174A PE=2 SV=1 - [F174A_HUMAN]                                         | 1.00  | 1.00  | 1.05 | 0.32 |
|  | ▽ | Q06828 | Fibromodulin OS=Homo sapiens GN=FMOD PE=1 SV=2 - [FMOD_HUMAN]                                                         | 1.00  | 1.00  | 0.57 | 0.32 |
|  | ▽ | Q5VW32 | BRO1 domain-containing protein BROX OS=Homo sapiens GN=BROX PE=1 SV=1 - [BROX_HUMAN]                                  | 6.00  | 6.00  | 0.65 | 0.32 |
|  | ▽ | Q12929 | Epidermal growth factor receptor kinase substrate 8 OS=Homo sapiens GN=EPS8 PE=1 SV=1 - [EPS8_HUMAN]                  | 6.00  | 6.00  | 0.66 | 0.32 |
|  | ▽ | Q2UY09 | Collagen alpha-1(XXVIII) chain OS=Homo sapiens GN=COL28A1 PE=2 SV=2 - [COSA1_HUMAN]                                   | 2.00  | 2.00  | 0.66 | 0.32 |
|  | ▽ | P10912 | Growth hormone receptor OS=Homo sapiens GN=GHR PE=1 SV=1 - [GHR_HUMAN]                                                | 2.00  | 2.00  | 0.81 | 0.32 |
|  | ▽ | P29992 | Guanine nucleotide-binding protein subunit alpha-11 OS=Homo sapiens GN=GNA11 PE=1 SV=2 - [GNA11_HUMAN]                | 2.00  | 5.00  | 0.57 | 0.32 |
|  | ▽ | Q9H4M9 | EH domain-containing protein 1 OS=Homo sapiens GN=EHD1 PE=1 SV=2 - [EHD1_HUMAN]                                       | 8.00  | 10.00 | 0.56 | 0.32 |
|  | ▽ | Q86TY3 | Uncharacterized protein C14orf37 OS=Homo sapiens GN=C14orf37 PE=2 SV=1 - [CN037_HUMAN]                                | 1.00  | 1.00  | 0.85 | 0.32 |
|  | ▽ | Q86UX2 | Inter-alpha-trypsin inhibitor heavy chain H5 OS=Homo sapiens GN=ITIH5 PE=2 SV=2 - [ITIH5_HUMAN]                       | 2.00  | 2.00  | 0.59 | 0.32 |
|  | ▽ | P20073 | Annexin A7 OS=Homo sapiens GN=ANXA7 PE=1 SV=3 - [ANXA7_HUMAN]                                                         | 7.00  | 7.00  | 0.54 | 0.32 |
|  | ▽ | P41181 | Aquaporin-2 OS=Homo sapiens GN=AQP2 PE=1 SV=1 - [AQP2_HUMAN]                                                          | 2.00  | 2.00  | 0.66 | 0.32 |
|  | ▽ | Q6GTX8 | Leukocyte-associated immunoglobulin-like receptor 1 OS=Homo sapiens GN=LAIR1 PE=1 SV=1 - [LAIR1_HUMAN]                | 3.00  | 4.00  | 0.79 | 0.32 |
|  | ▽ | P23471 | Receptor-type tyrosine-protein phosphatase zeta OS=Homo sapiens GN=PTPRZ1 PE=1 SV=4 - [PTPRZ_HUMAN]                   | 2.00  | 2.00  | 0.60 | 0.32 |
|  | ▽ | Q9HAR2 | Latrophilin-3 OS=Homo sapiens GN=LPHN3 PE=1 SV=2 - [LPHN3_HUMAN]                                                      | 1.00  | 1.00  | 0.81 | 0.32 |
|  | ▽ | O75976 | Carboxypeptidase D OS=Homo sapiens GN=CPD PE=1 SV=2 - [CBPD_HUMAN]                                                    | 1.00  | 1.00  | 0.75 | 0.31 |
|  | ▽ | Q9HCU0 | Endosialin OS=Homo sapiens GN=CD248 PE=1 SV=1 - [CD248_HUMAN]                                                         | 12.00 | 12.00 | 0.71 | 0.31 |
|  | ▽ | P40189 | Interleukin-6 receptor subunit beta OS=Homo sapiens GN=IL6ST PE=1 SV=2 - [IL6RB_HUMAN]                                | 9.00  | 9.00  | 0.76 | 0.31 |
|  | ▽ | P29323 | Ephrin type-B receptor 2 OS=Homo sapiens GN=EPHB2 PE=1 SV=5 - [EPHB2_HUMAN]                                           | 6.00  | 6.00  | 0.75 | 0.31 |
|  | ▽ | Q9P121 | Neurotrimin OS=Homo sapiens GN=NTM PE=1 SV=1 - [NTRI_HUMAN]                                                           | 4.00  | 5.00  | 0.65 | 0.31 |
|  | ▽ | P51148 | Ras-related protein Rab-5C OS=Homo sapiens GN=RAB5C PE=1 SV=2 - [RAB5C_HUMAN]                                         | 3.00  | 5.00  | 0.64 | 0.31 |
|  | ▽ | P35052 | Glypican-1 OS=Homo sapiens GN=GPC1 PE=1 SV=2 - [GPC1_HUMAN]                                                           | 14.00 | 14.00 | 0.52 | 0.31 |
|  | ▽ | Q9UBI6 | Guanine nucleotide-binding protein G(I)/G(S)/G(O) subunit gamma-12 OS=Homo sapiens GN=GNG12 PE=1 SV=1 - [GNG12_HUMAN] | 3.00  | 3.00  | 0.60 | 0.31 |
|  | ▽ | Q13873 | Bone morphogenetic protein receptor type-2 OS=Homo sapiens GN=BMPR2 PE=1 SV=2 - [BMPR2_HUMAN]                         | 4.00  | 4.00  | 0.89 | 0.31 |
|  | ▽ | Q9HBH0 | Rho-related GTP-binding protein RhoF OS=Homo sapiens GN=RHOPE=2 SV=1 - [RHOPE_HUMAN]                                  | 3.00  | 3.00  | 0.63 | 0.31 |
|  | ▽ | P00790 | Pepsin A OS=Homo sapiens GN=PGA3 PE=1 SV=1 - [PEPA_HUMAN]                                                             | 4.00  | 4.00  | 0.72 | 0.31 |
|  | ▽ | Q9UBD6 | Ammonium transporter Rh type C OS=Homo sapiens GN=RHCG PE=1 SV=1 - [RHCG_HUMAN]                                       | 2.00  | 2.00  | 0.82 | 0.31 |
|  | ▽ | Q9UPP1 | Histone lysine demethylase PHF8 OS=Homo sapiens GN=PHF8 PE=1 SV=3 - [PHF8_HUMAN]                                      | 1.00  | 1.00  | 0.70 | 0.31 |
|  | ▽ | P16070 | CD44 antigen OS=Homo sapiens GN=CD44 PE=1 SV=2 - [CD44_HUMAN]                                                         | 5.00  | 5.00  | 1.12 | 0.31 |
|  | ▽ | O00308 | NEDD4-like E3 ubiquitin-protein ligase WWP2 OS=Homo sapiens GN=WWP2 PE=1 SV=2 - [WWP2_HUMAN]                          | 1.00  | 1.00  | 0.52 | 0.31 |
|  | ▽ | Q9NPF0 | CD320 antigen OS=Homo sapiens GN=CD320 PE=1 SV=1 - [CD320_HUMAN]                                                      | 3.00  | 3.00  | 0.79 | 0.31 |
|  | ▽ | Q8IX04 | Ubiquitin-conjugating enzyme E2 variant 3 OS=Homo sapiens GN=UEVLD PE=1 SV=2 - [UEVLD_HUMAN]                          | 4.00  | 4.00  | 0.51 | 0.31 |
|  | ▽ | Q9UKY0 | Prion-like protein doppel OS=Homo sapiens GN=PRND PE=1 SV=2 - [PRND_HUMAN]                                            | 1.00  | 1.00  | 0.64 | 0.31 |
|  | ▽ | Q16363 | Laminin subunit alpha-4 OS=Homo sapiens GN=LAMA4 PE=1 SV=4 - [LAMA4_HUMAN]                                            | 3.00  | 3.00  | 0.65 | 0.30 |

|  |   |        |                                                                                                          |       |       |      |      |
|--|---|--------|----------------------------------------------------------------------------------------------------------|-------|-------|------|------|
|  | ▽ | A8K2U0 | Alpha-2-macroglobulin-like protein 1 OS=Homo sapiens GN=A2ML1 PE=1 SV=2 - [A2ML1_HUMAN]                  | 8.00  | 8.00  | 0.90 | 0.30 |
|  | ▽ | P12109 | Collagen alpha-1(VI) chain OS=Homo sapiens GN=COL6A1 PE=1 SV=3 - [CO6A1_HUMAN]                           | 31.00 | 31.00 | 0.68 | 0.30 |
|  | ▽ | Q7Z5N4 | Protein sidekick-1 OS=Homo sapiens GN=SDK1 PE=1 SV=3 - [SDK1_HUMAN]                                      | 1.00  | 1.00  | 1.64 | 0.30 |
|  | ▽ | Q86UN3 | Reticulon-4 receptor-like 2 OS=Homo sapiens GN=RTN4RL2 PE=1 SV=1 - [R4RL2_HUMAN]                         | 7.00  | 7.00  | 0.70 | 0.30 |
|  | ▽ | Q4LDE5 | Sushi, von Willebrand factor type A, EGF and pentraxin domain-containing protein 1 OS=Homo sapiens GN=SV | 2.00  | 2.00  | 0.60 | 0.30 |
|  | ▽ | P20336 | Ras-related protein Rab-3A OS=Homo sapiens GN=RAB3A PE=1 SV=1 - [RAB3A_HUMAN]                            | 1.00  | 3.00  | 0.62 | 0.30 |
|  | ▽ | Q14332 | Frizzled-2 OS=Homo sapiens GN=FZD2 PE=2 SV=1 - [FZD2_HUMAN]                                              | 2.00  | 3.00  | 0.89 | 0.30 |
|  | ▽ | P08962 | CD63 antigen OS=Homo sapiens GN=CD63 PE=1 SV=2 - [CD63_HUMAN]                                            | 2.00  | 2.00  | 0.67 | 0.30 |
|  | ▽ | Q9H9P2 | Chondrolectin OS=Homo sapiens GN=CHODL PE=2 SV=2 - [CHODL_HUMAN]                                         | 1.00  | 1.00  | 0.70 | 0.29 |
|  | ▽ | Q8WUF5 | RelA-associated inhibitor OS=Homo sapiens GN=PPP1R13L PE=1 SV=4 - [IASPP_HUMAN]                          | 1.00  | 1.00  | 1.26 | 0.29 |
|  | ▽ | Q9NU53 | Uncharacterized protein C6orf72 OS=Homo sapiens GN=C6orf72 PE=2 SV=1 - [CF072_HUMAN]                     | 5.00  | 5.00  | 0.68 | 0.29 |
|  | ▽ | P20151 | Kallikrein-2 OS=Homo sapiens GN=KLK2 PE=2 SV=1 - [KLK2_HUMAN]                                            | 2.00  | 3.00  | 0.59 | 0.29 |
|  | ▽ | Q9Y3E7 | Charged multivesicular body protein 3 OS=Homo sapiens GN=VPS24 PE=1 SV=3 - [CHMP3_HUMAN]                 | 2.00  | 2.00  | 0.56 | 0.29 |
|  | ▽ | Q92902 | Hermansky-Pudlak syndrome 1 protein OS=Homo sapiens GN=HPS1 PE=1 SV=2 - [HPS1_HUMAN]                     | 1.00  | 1.00  | 1.40 | 0.29 |
|  | ▽ | O14798 | Tumor necrosis factor receptor superfamily member 10C OS=Homo sapiens GN=TNFRSF10C PE=1 SV=3 - [T        | 3.00  | 3.00  | 0.91 | 0.29 |
|  | ▽ | Q9H7M9 | Platelet receptor Gi24 OS=Homo sapiens GN=C10orf54 PE=1 SV=2 - [GI24_HUMAN]                              | 1.00  | 1.00  | 0.64 | 0.29 |
|  | ▽ | Q86YL7 | Podoplanin OS=Homo sapiens GN=PDPN PE=1 SV=3 - [PDPN_HUMAN]                                              | 1.00  | 1.00  | 0.65 | 0.28 |
|  | ▽ | P10586 | Receptor-type tyrosine-protein phosphatase F OS=Homo sapiens GN=PTPRF PE=1 SV=2 - [PTPRF_HUMAN]          | 2.00  | 2.00  | 0.73 | 0.28 |
|  | ▽ | P22748 | Carbonic anhydrase 4 OS=Homo sapiens GN=CA4 PE=1 SV=2 - [CAH4_HUMAN]                                     | 1.00  | 1.00  | 0.62 | 0.28 |
|  | ▽ | Q9H665 | Transmembrane protein 149 OS=Homo sapiens GN=TMEM149 PE=2 SV=1 - [TM149_HUMAN]                           | 4.00  | 4.00  | 0.71 | 0.28 |
|  | ▽ | P07947 | Proto-oncogene tyrosine-protein kinase Yes OS=Homo sapiens GN=YES1 PE=1 SV=3 - [YES_HUMAN]               | 3.00  | 3.00  | 0.52 | 0.28 |
|  | ▽ | Q9UQB8 | Brain-specific angiogenesis inhibitor 1-associated protein 2 OS=Homo sapiens GN=BAIAP2 PE=1 SV=1 - [BA   | 2.00  | 2.00  | 0.54 | 0.28 |
|  | ▽ | P30530 | Tyrosine-protein kinase receptor UFO OS=Homo sapiens GN=AXL PE=1 SV=3 - [UFO_HUMAN]                      | 7.00  | 7.00  | 0.72 | 0.28 |
|  | ▽ | O00161 | Synaptosomal-associated protein 23 OS=Homo sapiens GN=SNAP23 PE=1 SV=1 - [SNP23_HUMAN]                   | 3.00  | 3.00  | 0.60 | 0.28 |
|  | ▽ | Q9H223 | EH domain-containing protein 4 OS=Homo sapiens GN=EHD4 PE=1 SV=1 - [EHD4_HUMAN]                          | 7.00  | 9.00  | 0.70 | 0.28 |
|  | ▽ | P15328 | Folate receptor alpha OS=Homo sapiens GN=FOLR1 PE=1 SV=3 - [FOLR1_HUMAN]                                 | 5.00  | 6.00  | 0.63 | 0.27 |
|  | ▽ | Q99835 | Smoothed homolog OS=Homo sapiens GN=SMO PE=1 SV=1 - [SMO_HUMAN]                                          | 4.00  | 4.00  | 0.66 | 0.27 |
|  | ▽ | Q8NFT8 | Delta and Notch-like epidermal growth factor-related receptor OS=Homo sapiens GN=DNER PE=1 SV=1 - [DN    | 2.00  | 2.00  | 0.70 | 0.27 |
|  | ▽ | P22891 | Vitamin K-dependent protein Z OS=Homo sapiens GN=PROZ PE=1 SV=2 - [PROZ_HUMAN]                           | 10.00 | 10.00 | 0.68 | 0.27 |
|  | ▽ | O75487 | Glypican-4 OS=Homo sapiens GN=GPC4 PE=1 SV=4 - [GPC4_HUMAN]                                              | 5.00  | 6.00  | 0.57 | 0.27 |
|  | ▽ | Q9P2B2 | Prostaglandin F2 receptor negative regulator OS=Homo sapiens GN=PTGFRN PE=1 SV=2 - [FPRP_HUMAN]          | 4.00  | 4.00  | 0.64 | 0.27 |
|  | ▽ | Q9NP79 | Vacuolar protein sorting-associated protein VTA1 homolog OS=Homo sapiens GN=VTA1 PE=1 SV=1 - [VTA1       | 4.00  | 4.00  | 0.50 | 0.27 |
|  | ▽ | Q969X1 | Transmembrane BAX inhibitor motif-containing protein 1 OS=Homo sapiens GN=TMBIM1 PE=1 SV=2 - [TM         | 2.00  | 2.00  | 0.56 | 0.27 |
|  | ▽ | Q99574 | Neuroserpin OS=Homo sapiens GN=SERPINI1 PE=1 SV=1 - [NEUS_HUMAN]                                         | 6.00  | 6.00  | 0.60 | 0.26 |
|  | ▽ | O75015 | Low affinity immunoglobulin gamma Fc region receptor III-B OS=Homo sapiens GN=FCGR3B PE=1 SV=2 - [       | 1.00  | 2.00  | 0.87 | 0.26 |
|  | ▽ | P28908 | Tumor necrosis factor receptor superfamily member 8 OS=Homo sapiens GN=TNFRSF8 PE=1 SV=1 - [TNR8_        | 1.00  | 1.00  | 1.17 | 0.26 |

|  |   |        |                                                                                                                  |       |       |      |      |
|--|---|--------|------------------------------------------------------------------------------------------------------------------|-------|-------|------|------|
|  | ▽ | Q96M61 | Melanoma-associated antigen B18 OS=Homo sapiens GN=MAGEB18 PE=1 SV=2 - [MAGBI_HUMAN]                             | 1.00  | 1.00  | 0.97 | 0.26 |
|  | ▽ | Q03403 | Trefoil factor 2 OS=Homo sapiens GN=TFF2 PE=1 SV=2 - [TFF2_HUMAN]                                                | 4.00  | 4.00  | 0.80 | 0.26 |
|  | ▽ | P05091 | Aldehyde dehydrogenase, mitochondrial OS=Homo sapiens GN=ALDH2 PE=1 SV=2 - [ALDH2_HUMAN]                         | 1.00  | 2.00  | 1.22 | 0.26 |
|  | ▽ | P60033 | CD81 antigen OS=Homo sapiens GN=CD81 PE=1 SV=1 - [CD81_HUMAN]                                                    | 1.00  | 1.00  | 0.69 | 0.26 |
|  | ▽ | Q6UY11 | Protein delta homolog 2 OS=Homo sapiens GN=DLK2 PE=2 SV=1 - [DLK2_HUMAN]                                         | 4.00  | 4.00  | 0.84 | 0.25 |
|  | ▽ | Q9BZZ2 | Sialoadhesin OS=Homo sapiens GN=SIGLEC1 PE=1 SV=2 - [SN_HUMAN]                                                   | 3.00  | 3.00  | 0.77 | 0.25 |
|  | ▽ | Q6DK17 | Transmembrane protein PVRIG OS=Homo sapiens GN=PVRIG PE=2 SV=1 - [PVRIG_HUMAN]                                   | 1.00  | 1.00  | 0.78 | 0.25 |
|  | ▽ | P12319 | High affinity immunoglobulin epsilon receptor subunit alpha OS=Homo sapiens GN=FCER1A PE=1 SV=1 - [FCER1A_HUMAN] | 1.00  | 1.00  | 0.57 | 0.25 |
|  | ▽ | P15941 | Mucin-1 OS=Homo sapiens GN=MUC1 PE=1 SV=3 - [MUC1_HUMAN]                                                         | 8.00  | 8.00  | 0.84 | 0.25 |
|  | ▽ | Q8IYS5 | Osteoclast-associated immunoglobulin-like receptor OS=Homo sapiens GN=OSCAR PE=2 SV=2 - [OSCAR_HUMAN]            | 4.00  | 4.00  | 0.75 | 0.25 |
|  | ▽ | Q07092 | Collagen alpha-1(XVI) chain OS=Homo sapiens GN=COL16A1 PE=1 SV=2 - [COGA1_HUMAN]                                 | 1.00  | 1.00  | 0.60 | 0.25 |
|  | ▽ | P48594 | Serpin B4 OS=Homo sapiens GN=SERPINB4 PE=1 SV=2 - [SPB4_HUMAN]                                                   | 2.00  | 6.00  | 0.75 | 0.24 |
|  | ▽ | Q9HBB8 | Cadherin-related family member 5 OS=Homo sapiens GN=CDHR5 PE=1 SV=3 - [CDHR5_HUMAN]                              | 4.00  | 4.00  | 0.89 | 0.24 |
|  | ▽ | P53990 | IST1 homolog OS=Homo sapiens GN=KIAA0174 PE=1 SV=1 - [IST1_HUMAN]                                                | 11.00 | 11.00 | 0.59 | 0.24 |
|  | ▽ | Q9NY72 | Sodium channel subunit beta-3 OS=Homo sapiens GN=SCN3B PE=1 SV=1 - [SCN3B_HUMAN]                                 | 1.00  | 1.00  | 0.61 | 0.24 |
|  | ▽ | Q8N2G4 | Ly6/PLAUR domain-containing protein 1 OS=Homo sapiens GN=LYPD1 PE=1 SV=2 - [LYPD1_HUMAN]                         | 1.00  | 1.00  | 0.55 | 0.24 |
|  | ▽ | Q99075 | Proheparin-binding EGF-like growth factor OS=Homo sapiens GN=HBEGF PE=1 SV=1 - [HBEGF_HUMAN]                     | 1.00  | 1.00  | 0.70 | 0.24 |
|  | ▽ | P08138 | Tumor necrosis factor receptor superfamily member 16 OS=Homo sapiens GN=NGFR PE=1 SV=1 - [TNFR16_HUMAN]          | 4.00  | 4.00  | 0.62 | 0.24 |
|  | ▽ | P36639 | 7,8-dihydro-8-oxoguanine triphosphatase OS=Homo sapiens GN=NUDT1 PE=1 SV=3 - [8ODP_HUMAN]                        | 4.00  | 4.00  | 0.66 | 0.23 |
|  | ▽ | P62070 | Ras-related protein R-Ras2 OS=Homo sapiens GN=RRAS2 PE=1 SV=1 - [RRAS2_HUMAN]                                    | 1.00  | 1.00  | 0.56 | 0.23 |
|  | ▽ | Q53GD3 | Choline transporter-like protein 4 OS=Homo sapiens GN=SLC44A4 PE=2 SV=1 - [CTL4_HUMAN]                           | 4.00  | 4.00  | 0.57 | 0.23 |
|  | ▽ | P43115 | Prostaglandin E2 receptor EP3 subtype OS=Homo sapiens GN=PTGER3 PE=2 SV=1 - [PE2R3_HUMAN]                        | 1.00  | 1.00  | 0.70 | 0.23 |
|  | ▽ | O95467 | Neuroendocrine secretory protein 55 OS=Homo sapiens GN=GNAS PE=2 SV=1 - [GNAS3_HUMAN]                            | 1.00  | 1.00  | 0.67 | 0.22 |
|  | ▽ | Q9UNN8 | Endothelial protein C receptor OS=Homo sapiens GN=PROCR PE=1 SV=1 - [EPCR_HUMAN]                                 | 4.00  | 4.00  | 0.92 | 0.22 |
|  | ▽ | P09758 | Tumor-associated calcium signal transducer 2 OS=Homo sapiens GN=TACSTD2 PE=1 SV=3 - [TACD2_HUMAN]                | 1.00  | 1.00  | 0.63 | 0.22 |
|  | ▽ | Q9UIV8 | Serpin B13 OS=Homo sapiens GN=SERPINB13 PE=2 SV=2 - [SPB13_HUMAN]                                                | 2.00  | 2.00  | 0.51 | 0.22 |
|  | ▽ | P50148 | Guanine nucleotide-binding protein G(q) subunit alpha OS=Homo sapiens GN=GNAQ PE=1 SV=4 - [GNAQ_HUMAN]           | 1.00  | 4.00  | 0.53 | 0.22 |
|  | ▽ | Q969L2 | Protein MAL2 OS=Homo sapiens GN=MAL2 PE=1 SV=1 - [MAL2_HUMAN]                                                    | 1.00  | 1.00  | 0.62 | 0.22 |
|  | ▽ | Q99816 | Tumor susceptibility gene 101 protein OS=Homo sapiens GN=TSG101 PE=1 SV=2 - [TS101_HUMAN]                        | 7.00  | 7.00  | 0.59 | 0.22 |
|  | ▽ | Q7LBR1 | Charged multivesicular body protein 1b OS=Homo sapiens GN=CHMP1B PE=1 SV=1 - [CHM1B_HUMAN]                       | 2.00  | 2.00  | 0.83 | 0.21 |
|  | ▽ | Q96HA4 | Uncharacterized protein C1orf159 OS=Homo sapiens GN=C1orf159 PE=2 SV=2 - [CA159_HUMAN]                           | 1.00  | 1.00  | 0.66 | 0.21 |
|  | ▽ | Q14982 | Opioid-binding protein/cell adhesion molecule OS=Homo sapiens GN=OPCML PE=1 SV=1 - [OPCM_HUMAN]                  | 5.00  | 6.00  | 0.60 | 0.20 |
|  | ▽ | Q01151 | CD83 antigen OS=Homo sapiens GN=CD83 PE=1 SV=1 - [CD83_HUMAN]                                                    | 1.00  | 1.00  | 0.57 | 0.20 |
|  | ▽ | O75144 | ICOS ligand OS=Homo sapiens GN=ICOSLG PE=1 SV=2 - [ICOSL_HUMAN]                                                  | 4.00  | 4.00  | 0.69 | 0.20 |
|  | ▽ | P80370 | Protein delta homolog 1 OS=Homo sapiens GN=DLK1 PE=1 SV=3 - [DLK1_HUMAN]                                         | 2.00  | 2.00  | 1.04 | 0.20 |
|  | ▽ | Q9NZZ3 | Charged multivesicular body protein 5 OS=Homo sapiens GN=CHMP5 PE=1 SV=1 - [CHMP5_HUMAN]                         | 5.00  | 5.00  | 0.54 | 0.20 |

|  |   |        |                                                                                            |       |       |      |      |
|--|---|--------|--------------------------------------------------------------------------------------------|-------|-------|------|------|
|  | ▽ | O43633 | Charged multivesicular body protein 2a OS=Homo sapiens GN=CHMP2A PE=1 SV=1 - [CHM2A_HUMAN] | 3.00  | 3.00  | 0.63 | 0.20 |
|  | ▽ | P04746 | Pancreatic alpha-amylase OS=Homo sapiens GN=AMY2A PE=1 SV=2 - [AMYP_HUMAN]                 | 4.00  | 22.00 | 0.66 | 0.20 |
|  | ▽ | P41217 | OX-2 membrane glycoprotein OS=Homo sapiens GN=CD200 PE=2 SV=3 - [OX2G_HUMAN]               | 4.00  | 4.00  | 0.73 | 0.19 |
|  | ▽ | P07204 | Thrombomodulin OS=Homo sapiens GN=THBD PE=1 SV=2 - [TRBM_HUMAN]                            | 4.00  | 4.00  | 0.62 | 0.19 |
|  | ▽ | O00337 | Sodium/nucleoside cotransporter 1 OS=Homo sapiens GN=SLC28A1 PE=2 SV=2 - [S28A1_HUMAN]     | 1.00  | 1.00  | 0.56 | 0.18 |
|  | ▽ | P01133 | Pro-epidermal growth factor OS=Homo sapiens GN=EGF PE=1 SV=2 - [EGF_HUMAN]                 | 34.00 | 34.00 | 0.50 | 0.18 |
|  | ▽ | Q9HCG8 | Pre-mRNA-splicing factor CWC22 homolog OS=Homo sapiens GN=CWC22 PE=1 SV=3 - [CWC22_HUMAN]  | 1.00  | 1.00  | 0.78 | 0.18 |
|  | ▽ | Q9UQN3 | Charged multivesicular body protein 2b OS=Homo sapiens GN=CHMP2B PE=1 SV=1 - [CHM2B_HUMAN] | 4.00  | 4.00  | 0.58 | 0.18 |
|  | ▽ | Q6UXI9 | Nephronectin OS=Homo sapiens GN=NPNT PE=2 SV=2 - [NPNT_HUMAN]                              | 1.00  | 1.00  | 0.63 | 0.18 |
|  | ▽ | Q9HD42 | Charged multivesicular body protein 1a OS=Homo sapiens GN=CHMP1A PE=1 SV=1 - [CHM1A_HUMAN] | 1.00  | 1.00  | 0.55 | 0.17 |
|  | ▽ | P19961 | Alpha-amylase 2B OS=Homo sapiens GN=AMY2B PE=1 SV=1 - [AMY2B_HUMAN]                        | 1.00  | 20.00 | 0.61 | 0.17 |
|  | ▽ | P07911 | Uromodulin OS=Homo sapiens GN=UMOD PE=1 SV=1 - [UROM_HUMAN]                                | 28.00 | 28.00 | 0.93 | 0.16 |
|  | ▽ | Q9UKR3 | Kallikrein-13 OS=Homo sapiens GN=KLK13 PE=2 SV=1 - [KLK13_HUMAN]                           | 3.00  | 3.00  | 0.51 | 0.16 |
|  | ▽ | P31944 | Caspase-14 OS=Homo sapiens GN=CASP14 PE=1 SV=2 - [CASPE_HUMAN]                             | 13.00 | 13.00 | 1.07 | 0.16 |
|  | ▽ | P09564 | T-cell antigen CD7 OS=Homo sapiens GN=CD7 PE=1 SV=1 - [CD7_HUMAN]                          | 2.00  | 2.00  | 0.64 | 0.15 |
|  | ▽ | O14594 | Neurocan core protein OS=Homo sapiens GN=NCAN PE=2 SV=3 - [NCAN_HUMAN]                     | 1.00  | 1.00  | 0.60 | 0.14 |
|  | ▽ | P31151 | Protein S100-A7 OS=Homo sapiens GN=S100A7 PE=1 SV=4 - [S10A7_HUMAN]                        | 5.00  | 5.00  | 0.95 | 0.12 |
|  |   |        |                                                                                            |       |       |      |      |
|  |   |        |                                                                                            |       |       |      |      |
